# Supplementary material
Source: Royal Society of Chemistry journal article supplement (doi:10.1039/d5cy01446h)
Supplement: d5cy01446h1.pdf [file d5cy01446h1.pdf]

## Electronic Supplementary Information

### **Ruthenium hydride catalyzed $\alpha$ -alkylation of ketones with primary alcohols for access to bioactive molecules using the borrowing hydrogen approach**

Ovender Singh,<sup>\*a, c</sup> Youngsuk Kim,<sup>c</sup> Rahul Chauhan,<sup>e</sup> Junseong Lee,<sup>a</sup> Nidhi Tyagi<sup>\*b</sup>

---

- a. Department of Chemistry, Chonnam National University, Gwangju 61186, Republic of Korea [ovendersingh@pusan.ac.kr](mailto:ovendersingh@pusan.ac.kr); [ovendersingh93@gmail.com](mailto:ovendersingh93@gmail.com)
- b. School of Chemical Sciences, Amity University Punjab, Sector 82A, IT City, International Airport Road, Mohali-140306, Punjab, India. Email: [nnaithani@pb.anity.edu](mailto:nnaithani@pb.anity.edu); [nidhityagi999@gmail.com](mailto:nidhityagi999@gmail.com)
- c. Pusan National University, Geumjeong-gu, Busan, Republic of Korea.
- d. Department of Chemistry, Indian Institute of Technology Roorkee, Roorkee 247667, Uttarakhand, India.

| Table of Content  |                                                                                                                                                                                                                    |          |
|-------------------|--------------------------------------------------------------------------------------------------------------------------------------------------------------------------------------------------------------------|----------|
| S. No.            | Experimental Details                                                                                                                                                                                               | Page No. |
| 1                 | Materials and Methods                                                                                                                                                                                              | 4        |
| 2.                | Single crystal X-ray crystallography details                                                                                                                                                                       | 4        |
| 3                 | Details of theoretical studies                                                                                                                                                                                     | 4        |
| <b>Figure S1</b>  | <sup>1</sup> H NMR spectrum of <b>a</b> ) ligand ( <b>L</b> <sup>1</sup> ) <b>b</b> ) complex <b>1</b> in CDCl <sub>3</sub> .                                                                                      | 5        |
| <b>Figure S2.</b> | a) Infrared spectrum of complex [L <sup>1</sup> RuH(CO)(PPh <sub>3</sub> ) <sub>2</sub> ]; b) Theoretically predicted IR spectra of complex <b>1</b>                                                               | 6        |
| <b>Figure S3</b>  | HRMS spectrum of ligand ( <b>L</b> <sup>1</sup> )                                                                                                                                                                  | 6        |
| <b>Figure S4</b>  | HRMS spectrum of complex [L <sup>1</sup> RuH(CO)(PPh <sub>3</sub> ) <sub>2</sub> ]                                                                                                                                 | 7        |
| <b>Figure S5.</b> | Cyclic voltammogram of <b>1</b> (1.0 mM) in THF vs Ag/AgCl. Electrolyte: Bu <sub>4</sub> NPF <sub>6</sub> (0.1 M), scan rate = 0.1 V/s.                                                                            | 7        |
| <b>Figure S6</b>  | (a) Optimized geometry of complex [L <sup>1</sup> RuH(CO)(PPh <sub>3</sub> ) <sub>2</sub> ] (b) Experimental and theoretical UV-Vis spectral analysis of complex <b>1</b>                                          | 8        |
| <b>Table S1</b>   | Co-ordinate parameters of complex [L <sup>1</sup> RuH(CO)(PPh <sub>3</sub> ) <sub>2</sub> ]                                                                                                                        | 9-11     |
| <b>Table S2</b>   | Crystal data and structure refinement for [L <sup>1</sup> RuH(CO)(PPh <sub>3</sub> ) <sub>2</sub> ]                                                                                                                | 12       |
| <b>Table S3</b>   | Bond Lengths for [L <sup>1</sup> RuH(CO)(PPh <sub>3</sub> ) <sub>2</sub> ]                                                                                                                                         | 13       |
| <b>Table S4</b>   | Bond Angles for [L <sup>1</sup> RuH(CO)(PPh <sub>3</sub> ) <sub>2</sub> ]                                                                                                                                          | 14-15    |
| <b>Table S5</b>   | Optimization of reaction conditions for α-alkylation in different solvents and bases                                                                                                                               | 16       |
| <b>Figure S7</b>  | Time dependent C-C coupled product formation during the reaction. <b>Reaction condition:</b> Acetophenone (1 mmol), benzyl alcohol (1 mmol), Cat. (0.1 mol%), base (0.15 equiv.), Solvent 2 mL at 120 °C for 24 h. | 17       |
| <b>Table S6</b>   | Effect of catalyst loading on the α-alkylation of ketones using primary alcohols catalytic reaction                                                                                                                | 17       |
| <b>Table S7</b>   | Catalytic performance metrics including reactants, % yields, TON, TOF, and reaction conditions                                                                                                                     | 18-19    |
| <b>Figure S8</b>  | <sup>1</sup> H NMR Spectrum (400 MHz, CDCl <sub>3</sub> ) of <b>P1</b>                                                                                                                                             | 20       |
| <b>Figure S9</b>  | <sup>13</sup> C{ <sup>1</sup> H} NMR Spectrum (125 MHz, CDCl <sub>3</sub> ) of <b>P1</b>                                                                                                                           | 20       |
| <b>Figure S10</b> | <sup>1</sup> H NMR Spectrum (400 MHz, CDCl <sub>3</sub> ) of <b>P2</b>                                                                                                                                             | 21       |
| <b>Figure S11</b> | <sup>13</sup> C{ <sup>1</sup> H} NMR Spectrum (125 MHz, CDCl <sub>3</sub> ) of <b>P2</b>                                                                                                                           | 21       |
| <b>Figure S12</b> | <sup>1</sup> H NMR Spectrum (400 MHz, CDCl <sub>3</sub> ) of <b>P3</b>                                                                                                                                             | 22       |
| <b>Figure S13</b> | <sup>13</sup> C{ <sup>1</sup> H} NMR Spectrum (125 MHz, CDCl <sub>3</sub> ) of <b>P3</b>                                                                                                                           | 22       |
| <b>Figure S14</b> | <sup>1</sup> H NMR Spectrum (400 MHz, CDCl <sub>3</sub> ) of <b>P4</b>                                                                                                                                             | 23       |
| <b>Figure S15</b> | <sup>13</sup> C{ <sup>1</sup> H} NMR Spectrum (125 MHz, CDCl <sub>3</sub> ) of <b>P4</b>                                                                                                                           | 23       |
| <b>Figure S16</b> | <sup>1</sup> H NMR Spectrum (400 MHz, CDCl <sub>3</sub> ) of <b>P5</b>                                                                                                                                             | 24       |
| <b>Figure S17</b> | <sup>13</sup> C{ <sup>1</sup> H} NMR Spectrum (125 MHz, CDCl <sub>3</sub> ) of <b>P5</b>                                                                                                                           | 24       |
| <b>Figure S18</b> | <sup>1</sup> H NMR Spectrum (400 MHz, CDCl <sub>3</sub> ) of <b>P6</b>                                                                                                                                             | 25       |
| <b>Figure S19</b> | <sup>13</sup> C{ <sup>1</sup> H} NMR Spectrum (100 MHz, CDCl <sub>3</sub> ) of <b>P6</b>                                                                                                                           | 25       |
| <b>Figure S20</b> | <sup>1</sup> H NMR Spectrum (400 MHz, CDCl <sub>3</sub> ) of <b>P7</b>                                                                                                                                             | 26       |
| <b>Figure S21</b> | <sup>13</sup> C{ <sup>1</sup> H} NMR Spectrum (100 MHz, CDCl <sub>3</sub> ) of <b>P7</b>                                                                                                                           | 26       |
| <b>Figure S22</b> | <sup>1</sup> H NMR Spectrum (400 MHz, CDCl <sub>3</sub> ) of <b>P8</b>                                                                                                                                             | 27       |
| <b>Figure S23</b> | <sup>13</sup> C{ <sup>1</sup> H} NMR Spectrum (100 MHz, CDCl <sub>3</sub> ) of <b>P8</b>                                                                                                                           | 27       |
| <b>Figure S24</b> | <sup>1</sup> H NMR Spectrum (400 MHz, CDCl <sub>3</sub> ) of <b>P9</b>                                                                                                                                             | 28       |
| <b>Figure S25</b> | <sup>13</sup> C{ <sup>1</sup> H} NMR Spectrum (100 MHz, CDCl <sub>3</sub> ) of <b>P9</b>                                                                                                                           | 28       |
| <b>Figure S26</b> | <sup>1</sup> H NMR Spectrum (400 MHz, CDCl <sub>3</sub> ) of <b>P10</b>                                                                                                                                            | 29       |
| <b>Figure S27</b> | <sup>13</sup> C{ <sup>1</sup> H} NMR Spectrum (100 MHz, CDCl <sub>3</sub> ) of <b>P10</b>                                                                                                                          | 29       |
| <b>Figure S28</b> | <sup>1</sup> H NMR Spectrum (400 MHz, CDCl <sub>3</sub> ) of <b>P11</b>                                                                                                                                            | 30       |
| <b>Figure S29</b> | <sup>13</sup> C{ <sup>1</sup> H} NMR Spectrum (100 MHz, CDCl <sub>3</sub> ) of <b>P11</b>                                                                                                                          | 30       |
| <b>Figure S30</b> | <sup>1</sup> H NMR Spectrum (400 MHz, CDCl <sub>3</sub> ) of <b>P12</b>                                                                                                                                            | 31       |
| <b>Figure S31</b> | <sup>13</sup> C{ <sup>1</sup> H} NMR Spectrum (100 MHz, CDCl <sub>3</sub> ) of <b>P12</b>                                                                                                                          | 31       |
| <b>Figure S32</b> | <sup>1</sup> H NMR Spectrum (400 MHz, CDCl <sub>3</sub> ) of <b>P13</b>                                                                                                                                            | 32       |
| <b>Figure S33</b> | <sup>13</sup> C NMR Spectrum (100 MHz, CDCl <sub>3</sub> ) of <b>P13</b>                                                                                                                                           | 32       |
| <b>Figure S34</b> | <sup>1</sup> H NMR Spectrum (400 MHz, CDCl <sub>3</sub> ) of <b>P14</b>                                                                                                                                            | 33       |
| <b>Figure S35</b> | <sup>13</sup> C{ <sup>1</sup> H} NMR Spectrum (100 MHz, CDCl <sub>3</sub> ) of <b>P14</b>                                                                                                                          | 33       |
| <b>Figure S36</b> | <sup>1</sup> H NMR Spectrum (400 MHz, CDCl <sub>3</sub> ) of <b>P15</b>                                                                                                                                            | 34       |
| <b>Figure S37</b> | <sup>13</sup> C{ <sup>1</sup> H} NMR Spectrum (125 MHz, CDCl <sub>3</sub> ) of <b>P15</b>                                                                                                                          | 34       |

|                   |                                                                                                        |    |
|-------------------|--------------------------------------------------------------------------------------------------------|----|
| <b>Figure S38</b> | <sup>1</sup> H NMR Spectrum (500 MHz, CDCl <sub>3</sub> ) of <b>P16</b>                                | 35 |
| <b>Figure S39</b> | <sup>13</sup> C{ <sup>1</sup> H} NMR Spectrum (125 MHz, CDCl <sub>3</sub> ) of <b>16</b>               | 35 |
| <b>Figure S40</b> | <sup>1</sup> H NMR Spectrum (400 MHz, CDCl <sub>3</sub> ) of <b>P17</b>                                | 36 |
| <b>Figure S41</b> | <sup>13</sup> C{ <sup>1</sup> H} NMR Spectrum (100 MHz, CDCl <sub>3</sub> ) of <b>P17</b>              | 36 |
| <b>Figure S42</b> | <sup>1</sup> H NMR Spectrum (500 MHz, CDCl <sub>3</sub> ) of <b>P18</b>                                | 37 |
| <b>Figure S43</b> | <sup>13</sup> C{ <sup>1</sup> H} NMR Spectrum (125 MHz, CDCl <sub>3</sub> ) of <b>P18</b>              | 37 |
| <b>Figure S44</b> | <sup>1</sup> H NMR Spectrum (500 MHz, CDCl <sub>3</sub> ) of <b>P19</b>                                | 38 |
| <b>Figure S45</b> | <sup>13</sup> C{ <sup>1</sup> H} NMR Spectrum (125 MHz, CDCl <sub>3</sub> ) of <b>P19</b>              | 38 |
| <b>Figure S46</b> | <sup>1</sup> H NMR Spectrum (400 MHz, CDCl <sub>3</sub> ) of <b>P20</b>                                | 39 |
| <b>Figure S47</b> | <sup>13</sup> C{ <sup>1</sup> H} NMR Spectrum (100 MHz, CDCl <sub>3</sub> ) of <b>P20</b>              | 39 |
| <b>Figure S48</b> | <sup>1</sup> H NMR Spectrum (400 MHz, CDCl <sub>3</sub> ) of <b>P21</b>                                | 40 |
| <b>Figure S49</b> | <sup>13</sup> C{ <sup>1</sup> H} NMR Spectrum (100 MHz, CDCl <sub>3</sub> ) of <b>P21</b>              | 40 |
| <b>Figure S50</b> | <sup>1</sup> H NMR Spectrum (500 MHz, DMSO-D <sub>6</sub> ) of <b>P22</b>                              | 41 |
| <b>Figure S51</b> | <sup>13</sup> C{ <sup>1</sup> H} NMR Spectrum (125 MHz, DMSO-D <sub>6</sub> ) of <b>P22</b>            | 41 |
| <b>Figure S52</b> | <sup>1</sup> H NMR Spectrum (500 MHz, CDCl <sub>3</sub> ) of <b>P23</b>                                | 42 |
| <b>Figure S53</b> | <sup>13</sup> C NMR Spectrum (125 MHz, CDCl <sub>3</sub> ) of <b>P23</b>                               | 42 |
| <b>Figure S54</b> | <sup>1</sup> H NMR Spectrum (500 MHz, CDCl <sub>3</sub> ) of <b>P24</b>                                | 43 |
| <b>Figure S55</b> | <sup>13</sup> C{ <sup>1</sup> H} NMR Spectrum (125 MHz, CDCl <sub>3</sub> ) of <b>P24</b>              | 43 |
| <b>Figure S56</b> | <sup>1</sup> H NMR Spectrum (500 MHz, CDCl <sub>3</sub> ) of <b>P25</b>                                | 44 |
| <b>Figure S57</b> | <sup>13</sup> C{ <sup>1</sup> H} NMR Spectrum (125 MHz, CDCl <sub>3</sub> ) of <b>P25</b>              | 44 |
| <b>Figure S58</b> | <sup>1</sup> H NMR Spectrum (500 MHz, CDCl <sub>3</sub> ) of <b>P26</b>                                | 45 |
| <b>Figure S59</b> | <sup>13</sup> C{ <sup>1</sup> H} NMR Spectrum (125 MHz, CDCl <sub>3</sub> ) of <b>P26</b>              | 45 |
| <b>Figure S60</b> | <sup>1</sup> H NMR Spectrum (500 MHz, CDCl <sub>3</sub> ) of <b>P27</b>                                | 46 |
| <b>Figure S61</b> | <sup>13</sup> C{ <sup>1</sup> H} NMR Spectrum (125 MHz, CDCl <sub>3</sub> ) of <b>P27</b>              | 46 |
| <b>Figure S62</b> | <sup>1</sup> H NMR Spectrum (500 MHz, CDCl <sub>3</sub> ) of <b>P28</b>                                | 47 |
| <b>Figure S63</b> | <sup>13</sup> C{ <sup>1</sup> H} NMR Spectrum (125 MHz, CDCl <sub>3</sub> ) of <b>P28</b>              | 47 |
| <b>Figure S64</b> | <sup>1</sup> H NMR Spectrum (500 MHz, CDCl <sub>3</sub> ) of <b>P29</b>                                | 48 |
| <b>Figure S65</b> | <sup>13</sup> C{ <sup>1</sup> H} NMR Spectrum (125 MHz, CDCl <sub>3</sub> ) of <b>P29</b>              | 48 |
| <b>Figure S66</b> | <sup>1</sup> H NMR Spectrum (500 MHz, CDCl <sub>3</sub> ) of <b>P30</b>                                | 49 |
| <b>Figure S67</b> | <sup>13</sup> C{ <sup>1</sup> H} NMR Spectrum (125 MHz, CDCl <sub>3</sub> ) of <b>P30</b>              | 49 |
| <b>Figure S68</b> | <sup>1</sup> H NMR Spectrum (500 MHz, CDCl <sub>3</sub> ) of <b>P31</b>                                | 50 |
| <b>Figure S69</b> | <sup>13</sup> C{ <sup>1</sup> H} NMR Spectrum (125 MHz, CDCl <sub>3</sub> ) of <b>P31</b>              | 50 |
| <b>Figure S70</b> | <sup>1</sup> H NMR Spectrum (500 MHz, CDCl <sub>3</sub> ) of <b>P32</b>                                | 51 |
| <b>Figure S71</b> | <sup>13</sup> C{ <sup>1</sup> H} NMR Spectrum (125 MHz, CDCl <sub>3</sub> ) of <b>P32</b>              | 51 |
| <b>Figure S72</b> | <sup>1</sup> H NMR Spectrum (500 MHz, CDCl <sub>3</sub> ) of <b>P33</b>                                | 52 |
| <b>Figure S73</b> | <sup>13</sup> C{ <sup>1</sup> H} NMR Spectrum (125 MHz, CDCl <sub>3</sub> ) of <b>P33</b>              | 52 |
| <b>Figure S74</b> | <sup>1</sup> H NMR Spectrum (500 MHz, CDCl <sub>3</sub> ) of <b>P34</b>                                | 53 |
| <b>Figure S75</b> | <sup>13</sup> C{ <sup>1</sup> H} NMR Spectrum (125 MHz, CDCl <sub>3</sub> ) of <b>P34</b>              | 53 |
| <b>Figure S76</b> | <sup>1</sup> H NMR Spectrum (500 MHz, CDCl <sub>3</sub> ) of <b>P35</b>                                | 54 |
| <b>Figure S77</b> | <sup>13</sup> C{ <sup>1</sup> H} NMR Spectrum (125 MHz, CDCl <sub>3</sub> ) of <b>P35</b>              | 54 |
| <b>Figure S78</b> | <sup>1</sup> H NMR Spectrum (500 MHz, CDCl <sub>3</sub> ) of <b>P36</b>                                | 55 |
| <b>Figure S79</b> | <sup>13</sup> C{ <sup>1</sup> H} NMR Spectrum (125 MHz, CDCl <sub>3</sub> ) of <b>P36</b>              | 55 |
| <b>Figure S80</b> | <sup>1</sup> H NMR Spectrum (500 MHz, CDCl <sub>3</sub> ) of <b>P37</b>                                | 56 |
| <b>Figure S81</b> | <sup>13</sup> C{ <sup>1</sup> H} NMR Spectrum (125 MHz, CDCl <sub>3</sub> ) of <b>P37</b>              | 56 |
| <b>Figure S82</b> | <sup>1</sup> H NMR Spectrum (500 MHz, CDCl <sub>3</sub> ) of <b>P38</b>                                | 57 |
| <b>Figure S83</b> | <sup>13</sup> C{ <sup>1</sup> H} NMR Spectrum (125 MHz, CDCl <sub>3</sub> ) of <b>P38</b>              | 57 |
| <b>Figure S84</b> | <sup>1</sup> H NMR Spectrum (500 MHz, CDCl <sub>3</sub> ) of <b>P39</b>                                | 58 |
| <b>Figure S85</b> | <sup>13</sup> C{ <sup>1</sup> H} NMR Spectrum (125 MHz, CDCl <sub>3</sub> ) of <b>P39</b>              | 58 |
| <b>Figure S86</b> | <sup>1</sup> H NMR Spectrum (500 MHz, CDCl <sub>3</sub> ) of <b>P40</b>                                | 59 |
| <b>Figure S87</b> | <sup>13</sup> C{ <sup>1</sup> H} NMR Spectrum (125 MHz, CDCl <sub>3</sub> ) of <b>P40</b>              | 59 |
| <b>Figure S88</b> | Determination of initial slopes for the product formation in the presence of excess PPh <sub>3</sub> . | 60 |
| <b>Figure S89</b> | HRMS spectrum of Intermediate C                                                                        | 61 |
| <b>Figure S90</b> | <sup>1</sup> H NMR Spectrum (500 MHz, CDCl <sub>3</sub> ).                                             | 61 |
| <b>Figure S91</b> | <sup>13</sup> C{ <sup>1</sup> H} NMR Spectrum (125 MHz, CDCl <sub>3</sub> )                            | 62 |
| <b>Figure S92</b> | GC-PDD Chromatograms                                                                                   | 62 |
| <b>Figure S93</b> | GC-MS spectra of styrene reduction                                                                     | 63 |
| <b>Scheme S1</b>  | Control experiments                                                                                    | 63 |
| <b>4.</b>         | References                                                                                             | 64 |

## 1. Methods and Materials Synthesis

Reagents were purchased from commercial suppliers (Sigma-Aldrich and Alfa Aesar stored under N<sub>2</sub> conditions, and used as it is. All reactions were performed under anaerobic and dry conditions by using N<sub>2</sub>-filled glove boxes. Ligand L1 (2-(2H-Benzotriazol-2-yl)-4,6-di-tert-pentylphenol), Trimethylamine and tris(triphenylphosphine)ruthenium(II) dichloride were purchased Sigma Aldrich. The formation and purity of synthesized compounds were confirmed by <sup>1</sup>H-NMR spectra collected on a Bruker 400 MHz, NMR spectrometer. IR spectra were obtained with a Bruker EQUINOX-55 spectrophotometer. The UV/Vis absorption spectra were recorded on a Shimadzu UV 3100 UV–Vis–NIR spectrophotometer. High resolution mass spectra (HRMS) were obtained on Agilent Q-TOF-Mass Spectrometer 6540-UHD LC/HRMS operating at 70 eV using direct inlet. Cyclic voltammetry experiments were conducted using an EmStat3-4WE potentiostat (PalmSens). A conventional three-electrode arrangement was using consisting a platinum wire as auxiliary electrode, glassy carbon as working electrode and the Ag(s)/AgCl as reference electrode. The measurement was performed in the presence of 0.1 M tetrabutylammonium hexafluorophosphate as the supporting electrolyte, using complex concentration 10<sup>-3</sup> M in THF in glove box under N<sub>2</sub>.

## 2. Single crystal X-ray crystallography study

The single crystal X-ray reflection data for complex [L<sup>1</sup>RuH(CO)(PPh<sub>3</sub>)<sub>2</sub>] was recorded on a Bruker APEX-II CCD-based diffractometer with graphite-monochromate d MoK $\alpha$  radiation (0.7107 Å). The hemisphere of reflection data was collected as  $\omega$  scan frames with 0.5% frame and an exposure time of 10 s/frame. The cell parameters were determined and refined using Bruker APEX2.<sup>1, 2</sup> The data were corrected for Lorentz and polarization effects and an empirical absorption correction was applied using the SADABS program.<sup>3</sup> The complex structure was solved by direct methods and refined by full matrix least-squares using the SHELXTL program package<sup>4</sup> and Olex26 with anisotropic thermal parameters for all non-hydrogen atoms.<sup>5</sup> Images were created with DIAMOND.<sup>6</sup> The relevant data are summarized in Table S1.

**3. Details of theoretical studies:** Geometry optimization calculations were performed using Gaussian 09 program package<sup>14</sup> for complex 1<sup>7</sup>. The complex was optimized using the B3LYP function and LANL2DZ basis set. The free energy change ( $\Delta G$ ) was calculated using the HOMO and LUMO gap between the two molecular orbitals. The Gauss View-5 graphical tool has been used for pictorial illustration of HOMO and LUMO frontier molecular orbitals<sup>8</sup>.

**4. Investigation: Homogeneity and Radical Participation:** General catalytic reaction is described as follows. (i) Acetophenone (0.1 mmol), benzyl alcohol (0.1 mmol) and base (0.15 eq) in toluene (2 mL) along with catalyst (0.1 mol%) and one drop of mercury was charged into a Schlenk tube under inert nitrogen atmosphere. (ii) Acetophenone (0.1 mmol), benzyl alcohol (0.1 mmol) and base (0.15 eq) in toluene (2 mL) along with catalyst (0.1 mol%) and TEMPO (0.1 mmol) was charged into a Schlenk tube under inert nitrogen atmosphere.

The reaction mixture was stirred at 120 °C, completion of reaction was monitored by thin layer chromatography (TLC). After 6 h, the reaction mixture was purified via column chromatography in hexane. The eluted solvent was evaporated and isolated products were analysed by <sup>1</sup>H/<sup>13</sup>C NMR techniques.

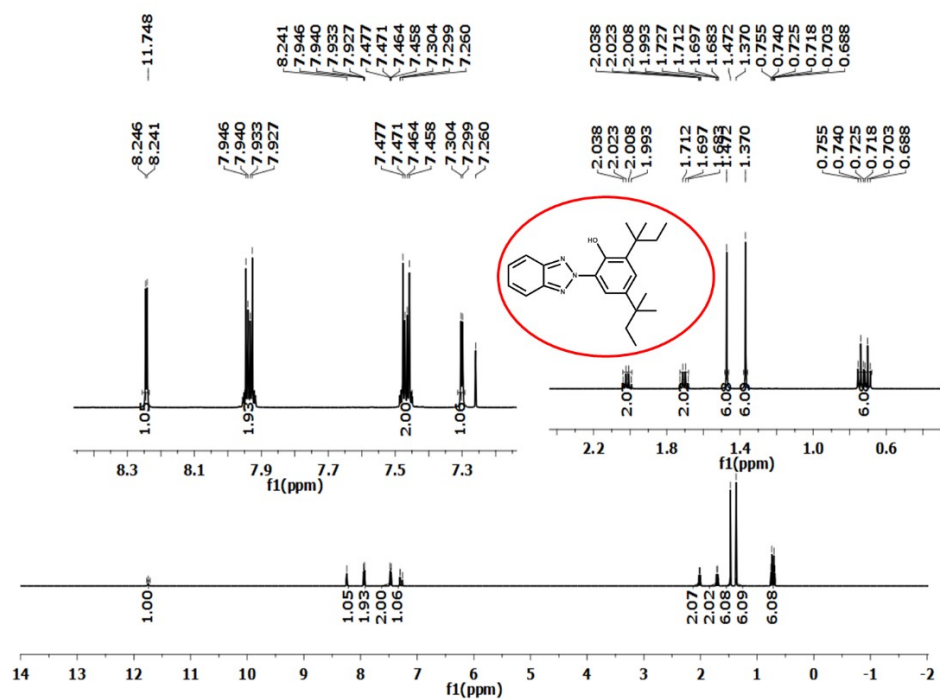

(a)

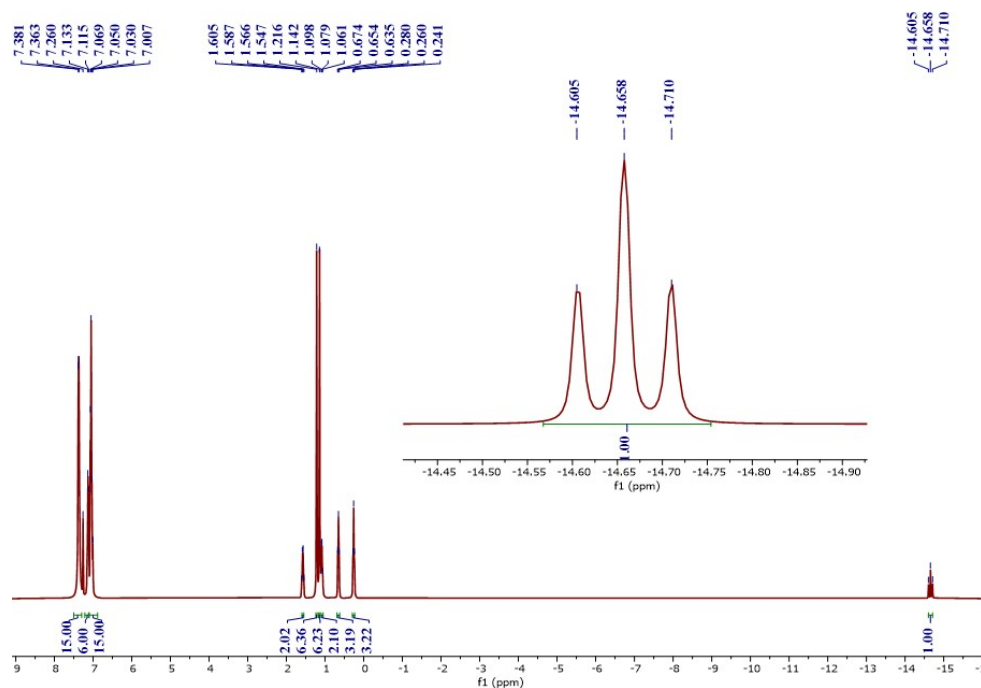

(b)

**Figure S1.** <sup>1</sup>H NMR spectrum of **a)** ligand (L<sup>1</sup>) **b)** complex **1** in CDCl<sub>3</sub>.

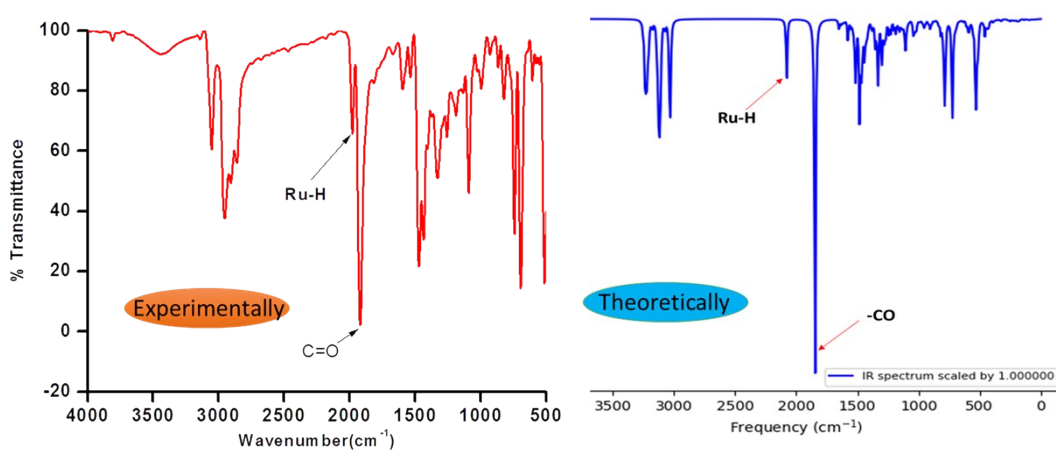

**Figure S2.** a) Infrared spectrum of complex  $[L^1RuH(CO)(PPh_3)_2]$ ; b) Theoretically predicted IR spectra of complex **1**

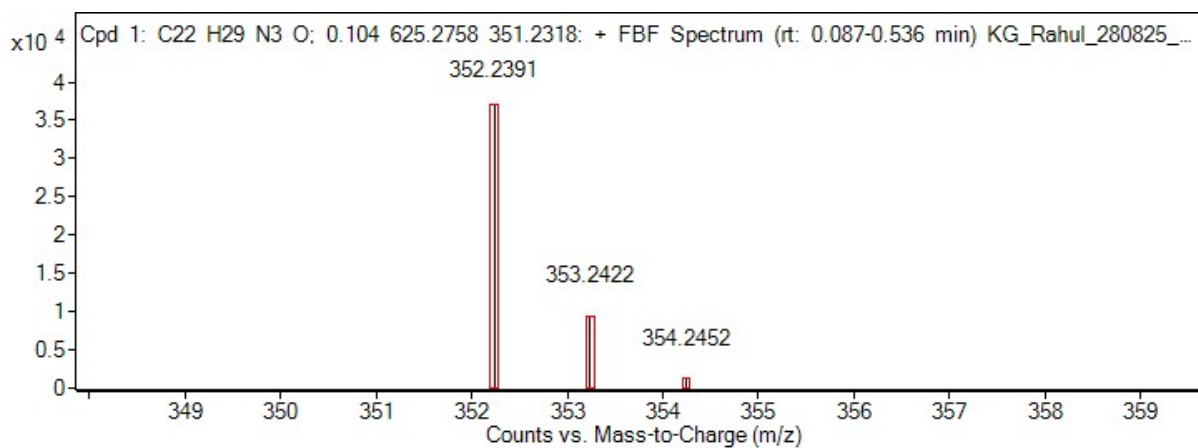

**Figure S3** HRMS spectrum of ligand ( $L^1$ )

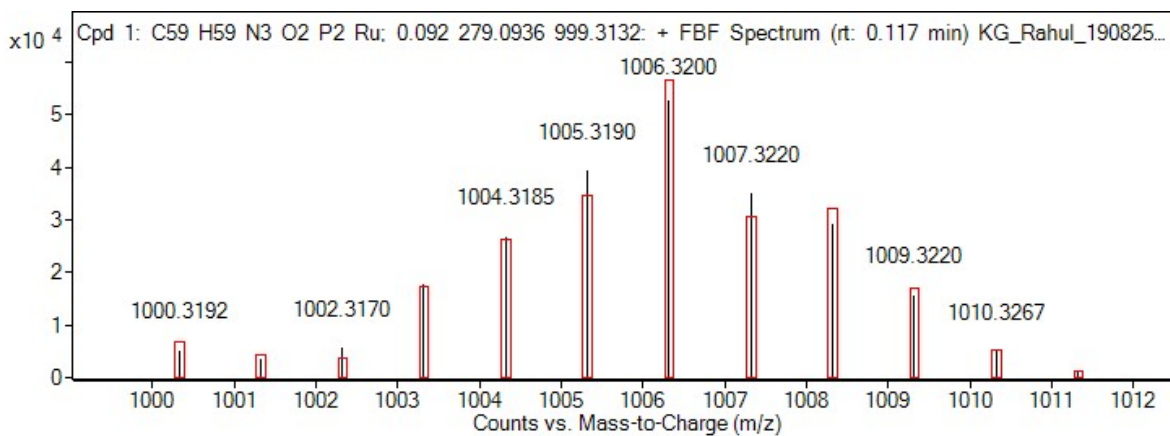

**Figure S4** HRMS spectrum of complex  $[L^1RuH(CO)(PPh_3)_2]$

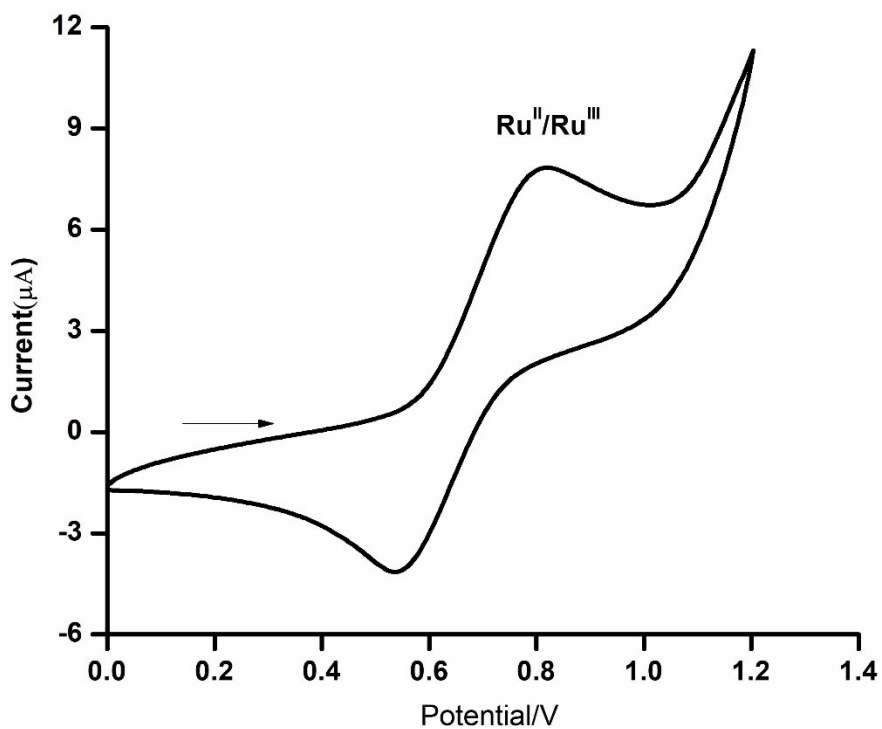

**Figure S5.** Cyclic voltammogram of **1** (1.0 mM) in THF vs Ag/AgCl. Electrolyte:  $Bu_4NPF_6$  (0.1 M), scan rate = 0.1 V/s.

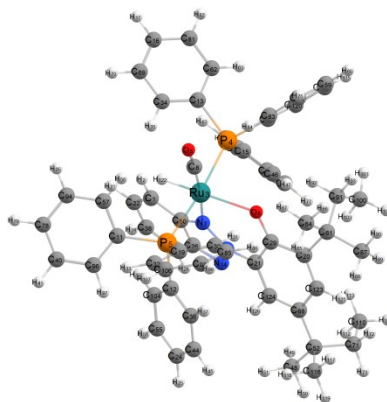

(a)

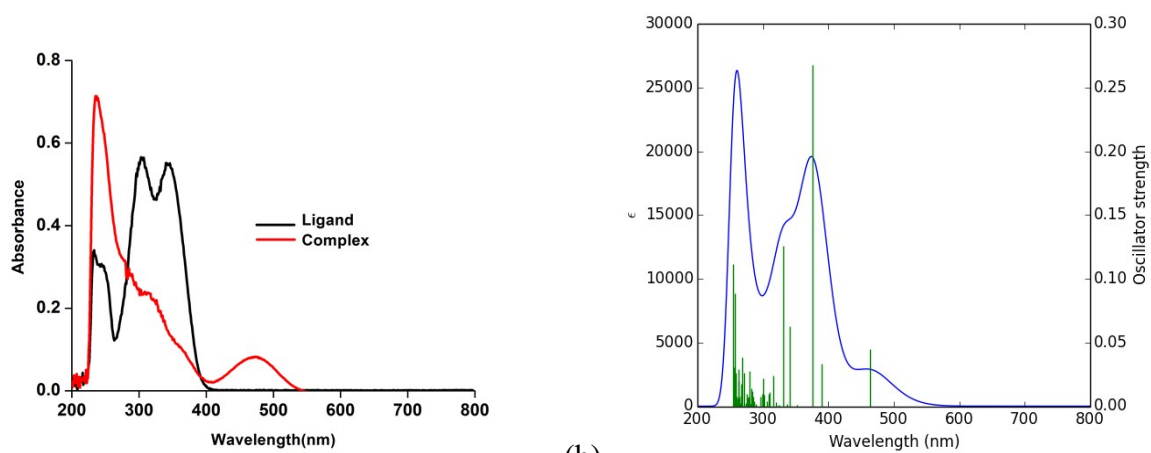

(b)

**Figure S6.** (a) Optimized geometry of complex  $[L^1RuH(CO)(PPh_3)_2]$ , **1**. (b) Experimental and theoretical UV-vis spectral analysis of ruthenium complex.

**Table S1.** Co-ordinate parameters of complex [L<sup>1</sup>RuH(CO)(PPh<sub>3</sub>)<sub>2</sub>]

|    |                 |                 |                 |
|----|-----------------|-----------------|-----------------|
| C  | -1.964876000000 | 1.931974000000  | 2.656590000000  |
| H  | -2.561719000000 | 2.247721000000  | 1.809303000000  |
| Ru | -0.916764000000 | 0.766919000000  | -0.687114000000 |
| P  | -2.735890000000 | -0.889671000000 | -0.271529000000 |
| P  | 0.731698000000  | 2.613998000000  | -1.001453000000 |
| O  | -1.961085000000 | 1.355584000000  | -3.482748000000 |
| N  | -0.253022000000 | 0.571401000000  | 1.345567000000  |
| C  | -1.538755000000 | 1.086222000000  | -2.394409000000 |
| O  | 0.385934000000  | -1.020245000000 | -0.967100000000 |
| N  | 0.839729000000  | -0.136455000000 | 1.805792000000  |
| C  | -0.001736000000 | 4.355604000000  | -0.897626000000 |
| C  | 2.190954000000  | 2.710034000000  | 0.191396000000  |
| C  | -4.508393000000 | -0.226945000000 | -0.303033000000 |
| N  | 0.994042000000  | -0.090322000000 | 3.161335000000  |
| C  | -2.599005000000 | -1.727608000000 | 1.410330000000  |
| C  | -7.157328000000 | 0.771012000000  | -0.388081000000 |
| H  | -8.174568000000 | 1.153249000000  | -0.422469000000 |
| C  | -2.881073000000 | -2.355999000000 | -1.462237000000 |
| C  | 1.564073000000  | 2.619398000000  | -2.693792000000 |
| C  | 2.407196000000  | -2.357022000000 | -0.840150000000 |
| C  | 1.787630000000  | -0.879697000000 | 1.022119000000  |
| C  | -2.276478000000 | 2.319746000000  | 3.959263000000  |
| H  | -3.141423000000 | 2.954873000000  | 4.131933000000  |
| C  | 4.343664000000  | 2.832160000000  | 2.024707000000  |
| H  | 5.171531000000  | 2.883676000000  | 2.727534000000  |
| C  | -0.039604000000 | 0.696919000000  | 3.601711000000  |
| C  | -0.369846000000 | 1.089746000000  | 4.924451000000  |
| H  | 0.232189000000  | 0.766593000000  | 5.767972000000  |
| C  | 1.472473000000  | -1.381898000000 | -0.286936000000 |
| C  | 1.818445000000  | 1.374104000000  | -3.305113000000 |
| H  | 1.514966000000  | 0.460086000000  | -2.805088000000 |
| C  | 1.944179000000  | 3.808218000000  | -3.352235000000 |
| H  | 1.745601000000  | 4.776390000000  | -2.903098000000 |
| C  | -4.746884000000 | 1.152713000000  | -0.464061000000 |
| H  | -3.905974000000 | 1.832804000000  | -0.558141000000 |
| C  | 3.494897000000  | 2.361511000000  | -0.216437000000 |
| H  | 3.685223000000  | 2.045377000000  | -1.237567000000 |
| C  | -1.490099000000 | 1.902280000000  | 5.084408000000  |
| H  | -1.781268000000 | 2.230601000000  | 6.078702000000  |
| C  | 0.223769000000  | 6.756332000000  | -0.466538000000 |
| H  | 0.833351000000  | 7.594970000000  | -0.139623000000 |
| C  | -3.490580000000 | -1.440589000000 | 2.463498000000  |
| H  | -4.313865000000 | -0.748522000000 | 2.314367000000  |
| C  | 4.566100000000  | 2.425300000000  | 0.695708000000  |

|   |                 |                 |                 |
|---|-----------------|-----------------|-----------------|
| H | 5.566954000000  | 2.158679000000  | 0.365588000000  |
| C | -1.526730000000 | -2.620817000000 | 1.636841000000  |
| H | -0.823178000000 | -2.842628000000 | 0.839863000000  |
| C | 5.553504000000  | -1.529850000000 | 3.042981000000  |
| H | 4.800301000000  | -1.800006000000 | 3.792306000000  |
| H | 6.540135000000  | -1.778727000000 | 3.455687000000  |
| H | 5.513312000000  | -0.441833000000 | 2.901944000000  |
| C | 5.348509000000  | -2.277459000000 | 1.701084000000  |
| C | -2.262127000000 | -2.947678000000 | 3.941652000000  |
| H | -2.133756000000 | -3.417625000000 | 4.913598000000  |
| C | 3.040323000000  | 3.173280000000  | 2.438672000000  |
| H | 2.856209000000  | 3.487188000000  | 3.462969000000  |
| C | -1.335239000000 | 4.572342000000  | -1.306398000000 |
| H | -1.949143000000 | 3.735073000000  | -1.619710000000 |
| C | -3.233439000000 | -4.478450000000 | -3.307367000000 |
| H | -3.367617000000 | -5.292502000000 | -4.015430000000 |
| C | 2.049795000000  | -3.168452000000 | -2.113903000000 |
| C | -5.609601000000 | -1.106755000000 | -0.188704000000 |
| H | -5.451816000000 | -2.175353000000 | -0.073405000000 |
| C | 1.807798000000  | -2.235663000000 | -3.335151000000 |
| H | 2.694275000000  | -1.617307000000 | -3.531116000000 |
| H | 1.611682000000  | -2.841089000000 | -4.231599000000 |
| H | 0.949425000000  | -1.585584000000 | -3.155038000000 |
| C | 3.968488000000  | -1.984781000000 | 1.072805000000  |
| C | -6.065069000000 | 1.650283000000  | -0.505972000000 |
| H | -6.233488000000 | 2.716767000000  | -0.633038000000 |
| C | 5.536653000000  | -3.816883000000 | 1.931780000000  |
| H | 5.502060000000  | -4.328697000000 | 0.959067000000  |
| H | 6.553242000000  | -3.974708000000 | 2.324476000000  |
| C | -2.847806000000 | -3.201287000000 | -3.758877000000 |
| H | -2.681074000000 | -3.023347000000 | -4.818259000000 |
| C | -1.362704000000 | -3.229863000000 | 2.893287000000  |
| H | -0.534910000000 | -3.915953000000 | 3.053016000000  |
| C | -1.107172000000 | 6.965438000000  | -0.876767000000 |
| H | -1.532261000000 | 7.966013000000  | -0.866197000000 |
| C | -0.825085000000 | 1.108532000000  | 2.480356000000  |
| C | -6.924976000000 | -0.610937000000 | -0.229225000000 |
| H | -7.762242000000 | -1.298546000000 | -0.140003000000 |
| C | -2.669258000000 | -2.148569000000 | -2.842172000000 |
| H | -2.366865000000 | -1.176644000000 | -3.214700000000 |
| C | 2.453430000000  | 1.316589000000  | -4.560637000000 |
| H | 2.643382000000  | 0.352289000000  | -5.024397000000 |
| C | 3.178779000000  | -4.153045000000 | -2.524910000000 |
| H | 4.100941000000  | -3.621302000000 | -2.796038000000 |
| H | 3.422407000000  | -4.878794000000 | -1.740510000000 |
| H | 2.850652000000  | -4.718543000000 | -3.407140000000 |

|   |                 |                 |                 |
|---|-----------------|-----------------|-----------------|
| C | 0.734907000000  | -3.987318000000 | -1.866201000000 |
| H | -0.069853000000 | -3.275796000000 | -1.657648000000 |
| H | 0.477133000000  | -4.492307000000 | -2.810614000000 |
| C | -1.883783000000 | 5.868888000000  | -1.299453000000 |
| H | -2.912022000000 | 6.018552000000  | -1.619008000000 |
| C | 0.774886000000  | 5.460434000000  | -0.482354000000 |
| H | 1.803618000000  | 5.319888000000  | -0.164795000000 |
| C | 2.831674000000  | 2.503756000000  | -5.216903000000 |
| H | 3.315482000000  | 2.460233000000  | -6.189632000000 |
| C | 0.795059000000  | -5.038027000000 | -0.736670000000 |
| H | -0.192793000000 | -5.497736000000 | -0.594889000000 |
| H | 1.505419000000  | -5.845299000000 | -0.957811000000 |
| H | 1.093726000000  | -4.583124000000 | 0.217144000000  |
| C | 1.970050000000  | 3.109678000000  | 1.528920000000  |
| H | 0.973919000000  | 3.390029000000  | 1.861519000000  |
| C | 2.573939000000  | 3.749415000000  | -4.610273000000 |
| H | 2.857788000000  | 4.670656000000  | -5.112979000000 |
| C | -3.323650000000 | -2.049880000000 | 3.723016000000  |
| H | -4.019149000000 | -1.819468000000 | 4.526164000000  |
| C | 4.516463000000  | -4.483466000000 | 2.878689000000  |
| H | 4.700287000000  | -5.564740000000 | 2.939766000000  |
| H | 4.579865000000  | -4.079443000000 | 3.896807000000  |
| H | 3.489642000000  | -4.335613000000 | 2.520930000000  |
| C | -3.441179000000 | -4.693221000000 | -1.931479000000 |
| H | -3.738717000000 | -5.674388000000 | -1.569725000000 |
| C | 6.464538000000  | -1.801833000000 | 0.721702000000  |
| H | 6.394478000000  | -2.309454000000 | -0.248565000000 |
| H | 6.389450000000  | -0.721024000000 | 0.543225000000  |
| H | 7.458247000000  | -2.013016000000 | 1.141192000000  |
| C | -3.269750000000 | -3.637905000000 | -1.015300000000 |
| H | -3.433369000000 | -3.825987000000 | 0.041535000000  |
| H | -1.888340000000 | 1.947163000000  | -0.222249000000 |
| C | 3.606759000000  | -2.594510000000 | -0.163069000000 |
| C | 3.021390000000  | -1.156152000000 | 1.663918000000  |
| H | 4.308899000000  | -3.294290000000 | -0.600888000000 |
| H | 3.197266000000  | -0.700428000000 | 2.628104000000  |

| <b>Table S2</b> Crystal data and structure refinement for [L <sup>1</sup> RuH(CO)(PPh <sub>3</sub> ) <sub>2</sub> ]. |                                                                   |
|----------------------------------------------------------------------------------------------------------------------|-------------------------------------------------------------------|
| Identification code                                                                                                  | ovender81-1                                                       |
| Empirical formula                                                                                                    | C <sub>59</sub> H <sub>59</sub> N <sub>4</sub> OP <sub>2</sub> Ru |
| Formula weight                                                                                                       | 1005.10                                                           |
| Temperature/K                                                                                                        | 296.15                                                            |
| Crystal system                                                                                                       | monoclinic                                                        |
| Space group                                                                                                          | C2/c                                                              |
| a/Å                                                                                                                  | 24.3079(9)                                                        |
| b/Å                                                                                                                  | 11.5688(3)                                                        |
| c/Å                                                                                                                  | 36.6542(11)                                                       |
| α/°                                                                                                                  | 90                                                                |
| β/°                                                                                                                  | 101.743(2)                                                        |
| γ/°                                                                                                                  | 90                                                                |
| Volume/Å <sup>3</sup>                                                                                                | 10091.9(6)                                                        |
| Z                                                                                                                    | 8                                                                 |
| ρ <sub>calc</sub> /g/cm <sup>3</sup>                                                                                 | 1.320                                                             |
| μ/mm <sup>-1</sup>                                                                                                   | 0.419                                                             |
| F(000)                                                                                                               | 4177.8                                                            |
| Crystal size/mm <sup>3</sup>                                                                                         | 0.24 × 0.24 × 0.24                                                |
| Radiation                                                                                                            | Mo Kα (λ = 0.71073)                                               |
| 2θ range for data collection/°                                                                                       | 5.42 to 52.92                                                     |
| Index ranges                                                                                                         | -30 ≤ h ≤ 30, -14 ≤ k ≤ 14, -45 ≤ l ≤ 44                          |
| Reflections collected                                                                                                | 71832                                                             |
| Independent reflections                                                                                              | 10317 [R <sub>int</sub> = 0.0553, R <sub>sigma</sub> = 0.0352]    |
| Data/restraints/parameters                                                                                           | 10317/0/614                                                       |
| Goodness-of-fit on F <sup>2</sup>                                                                                    | 1.059                                                             |
| Final R indexes [I ≥ 2σ (I)]                                                                                         | R <sub>1</sub> = 0.0445, wR <sub>2</sub> = 0.0966                 |
| Final R indexes [all data]                                                                                           | R <sub>1</sub> = 0.0556, wR <sub>2</sub> = 0.1017                 |
| Largest diff. peak/hole / e Å <sup>-3</sup>                                                                          | 1.20/-1.13                                                        |

**Table S3** Bond Lengths for [L<sup>1</sup>RuH(CO)(PPh<sub>3</sub>)<sub>2</sub>].

| Atom | Atom | Length/Å   |  | Atom | Atom | Length/Å |
|------|------|------------|--|------|------|----------|
| Ru1  | P2   | 2.3751(7)  |  | C26  | C37  | 1.398(4) |
| Ru1  | P1   | 2.3590(7)  |  | C26  | C41  | 1.383(4) |
| Ru1  | O2   | 2.1802(19) |  | C26  | C65  | 1.542(4) |
| Ru1  | C53  | 1.864(3)   |  | C27  | C71  | 1.544(5) |
| Ru1  | N3   | 2.149(2)   |  | C28  | C33  | 1.373(5) |
| P2   | C4   | 1.829(3)   |  | C29  | C43  | 1.375(5) |
| P2   | C36  | 1.824(3)   |  | C29  | C77  | 1.384(5) |
| P2   | C38  | 1.843(3)   |  | C31  | C34  | 1.512(6) |
| P1   | C9   | 1.835(3)   |  | C32  | C41  | 1.398(4) |
| P1   | C11  | 1.843(3)   |  | C33  | C42  | 1.396(6) |
| P1   | C25  | 1.826(3)   |  | C34  | C71  | 1.537(5) |
| C4   | C14  | 1.387(4)   |  | C36  | C76  | 1.404(5) |
| C4   | C46  | 1.401(4)   |  | C36  | C3   | 1.379(5) |
| O1   | C53  | 1.131(4)   |  | C38  | C75  | 1.391(4) |
| N2   | N1   | 1.328(3)   |  | C38  | C7   | 1.384(5) |
| N2   | C32  | 1.433(3)   |  | C40  | C49  | 1.369(5) |
| N2   | N3   | 1.347(3)   |  | C40  | C56  | 1.376(5) |
| N1   | C15  | 1.358(4)   |  | C42  | C1   | 1.366(5) |
| C8   | C9   | 1.384(4)   |  | C44  | C61  | 1.368(6) |
| C8   | C43  | 1.396(4)   |  | C44  | C66  | 1.380(5) |
| C9   | C48  | 1.389(4)   |  | C47  | C80  | 1.364(6) |
| O2   | C12  | 1.303(3)   |  | C47  | C10  | 1.365(6) |
| C11  | C57  | 1.389(4)   |  | C48  | C77  | 1.381(4) |
| C11  | C85  | 1.385(4)   |  | C49  | C85  | 1.388(4) |
| C12  | C24  | 1.447(4)   |  | C50  | C81  | 1.381(5) |
| C12  | C32  | 1.410(4)   |  | C51  | C55  | 1.368(7) |
| C14  | C5   | 1.391(4)   |  | C51  | C2   | 1.374(7) |
| C15  | C21  | 1.391(4)   |  | C55  | C76  | 1.375(5) |
| C15  | C28  | 1.420(4)   |  | C56  | C57  | 1.385(4) |
| C18  | C71  | 1.520(5)   |  | C58  | C5   | 1.384(5) |
| C20  | C46  | 1.374(5)   |  | C59  | C65  | 1.517(5) |
| C20  | C58  | 1.379(5)   |  | C61  | C81  | 1.380(6) |
| C21  | N3   | 1.357(3)   |  | C65  | C86  | 1.556(5) |
| C21  | C1   | 1.408(4)   |  | C65  | C6   | 1.534(5) |
| C24  | C37  | 1.376(4)   |  | C69  | C6   | 1.498(6) |
| C24  | C71  | 1.533(4)   |  | C75  | C10  | 1.396(5) |
| C25  | C50  | 1.398(4)   |  | C80  | C7   | 1.390(5) |
| C25  | C66  | 1.391(4)   |  | C3   | C2   | 1.398(5) |
|      |      |            |  |      |      |          |

| <b>Atom</b> | <b>Atom</b> | <b>Atom</b> | <b>Angle/°</b> | <b>Atom</b> | <b>Atom</b> | <b>Atom</b> | <b>Angle/°</b> |
|-------------|-------------|-------------|----------------|-------------|-------------|-------------|----------------|
| P1          | Ru1         | P2          | 174.12(3)      | O1          | C53         | Ru1         | 177.5(3)       |
| O2          | Ru1         | P2          | 81.47(5)       | C12         | C32         | N2          | 119.7(2)       |
| O2          | Ru1         | P1          | 103.86(5)      | C41         | C32         | N2          | 116.9(2)       |
| C53         | Ru1         | P2          | 90.71(8)       | C41         | C32         | C12         | 123.4(2)       |
| C53         | Ru1         | P1          | 85.92(8)       | C42         | C33         | C28         | 123.2(3)       |
| C53         | Ru1         | O2          | 100.43(10)     | C71         | C34         | C31         | 115.7(3)       |
| N3          | Ru1         | P2          | 92.79(6)       | C76         | C36         | P2          | 117.5(3)       |
| N3          | Ru1         | P1          | 90.64(6)       | C3          | C36         | P2          | 122.7(3)       |
| N3          | Ru1         | O2          | 79.61(8)       | C3          | C36         | C76         | 119.4(3)       |
| N3          | Ru1         | C53         | 176.46(10)     | C26         | C37         | C24         | 125.5(3)       |
| C4          | P2          | Ru1         | 118.65(9)      | C75         | C38         | P2          | 122.4(3)       |
| C36         | P2          | Ru1         | 112.52(9)      | C7          | C38         | P2          | 119.1(2)       |
| C36         | P2          | C4          | 104.24(14)     | C7          | C38         | C75         | 118.5(3)       |
| C38         | P2          | Ru1         | 115.25(10)     | C56         | C40         | C49         | 119.6(3)       |
| C38         | P2          | C4          | 100.96(13)     | C32         | C41         | C26         | 120.6(3)       |
| C38         | P2          | C36         | 103.37(14)     | C1          | C42         | C33         | 121.7(3)       |
| C9          | P1          | Ru1         | 116.57(9)      | C29         | C43         | C8          | 120.0(3)       |
| C11         | P1          | Ru1         | 117.59(9)      | C66         | C44         | C61         | 120.8(4)       |
| C11         | P1          | C9          | 99.37(12)      | C20         | C46         | C4          | 121.1(3)       |
| C25         | P1          | Ru1         | 114.48(9)      | C10         | C47         | C80         | 120.0(4)       |
| C25         | P1          | C9          | 105.95(13)     | C77         | C48         | C9          | 120.8(3)       |
| C25         | P1          | C11         | 100.58(13)     | C85         | C49         | C40         | 120.6(3)       |
| C14         | C4          | P2          | 121.0(2)       | C81         | C50         | C25         | 120.2(3)       |
| C46         | C4          | P2          | 121.0(2)       | C2          | C51         | C55         | 120.2(4)       |
| C46         | C4          | C14         | 117.9(3)       | C76         | C55         | C51         | 120.9(4)       |
| C32         | N2          | N1          | 119.8(2)       | C57         | C56         | C40         | 120.3(3)       |
| N3          | N2          | N1          | 115.1(2)       | C56         | C57         | C11         | 120.7(3)       |
| N3          | N2          | C32         | 125.2(2)       | C5          | C58         | C20         | 119.7(3)       |
| C15         | N1          | N2          | 103.4(2)       | C81         | C61         | C44         | 119.9(3)       |
| C43         | C8          | C9          | 120.3(3)       | N2          | N3          | Ru1         | 124.14(16)     |
| C8          | C9          | P1          | 125.1(2)       | C21         | N3          | Ru1         | 131.53(19)     |
| C48         | C9          | P1          | 115.8(2)       | C21         | N3          | N2          | 104.3(2)       |
| C48         | C9          | C8          | 119.0(3)       | C59         | C65         | C26         | 112.8(3)       |
| C12         | O2          | Ru1         | 122.11(16)     | C86         | C65         | C26         | 107.5(3)       |
| C57         | C11         | P1          | 118.9(2)       | C86         | C65         | C59         | 108.4(3)       |
| C85         | C11         | P1          | 122.5(2)       | C6          | C65         | C26         | 111.5(3)       |
| C85         | C11         | C57         | 118.4(3)       | C6          | C65         | C59         | 109.2(3)       |
| C24         | C12         | O2          | 122.2(3)       | C6          | C65         | C86         | 107.1(3)       |
| C32         | C12         | O2          | 122.8(2)       | C44         | C66         | C25         | 120.1(4)       |
| C32         | C12         | C24         | 115.0(3)       | C24         | C71         | C18         | 110.6(3)       |
| C5          | C14         | C4          | 121.0(3)       | C27         | C71         | C18         | 107.8(3)       |
| C21         | C15         | N1          | 109.7(3)       | C27         | C71         | C24         | 110.7(3)       |

|     |     |     |          |  |     |     |     |          |
|-----|-----|-----|----------|--|-----|-----|-----|----------|
| C28 | C15 | N1  | 129.3(3) |  | C34 | C71 | C18 | 109.0(3) |
| C28 | C15 | C21 | 121.0(3) |  | C34 | C71 | C24 | 110.0(3) |
| C58 | C20 | C46 | 120.4(3) |  | C34 | C71 | C27 | 108.7(3) |
| N3  | C21 | C15 | 107.5(3) |  | C10 | C75 | C38 | 120.0(4) |
| C1  | C21 | C15 | 121.9(3) |  | C55 | C76 | C36 | 119.7(4) |
| C1  | C21 | N3  | 130.6(3) |  | C48 | C77 | C29 | 119.8(3) |
| C37 | C24 | C12 | 118.3(3) |  | C7  | C80 | C47 | 120.2(4) |
| C71 | C24 | C12 | 119.2(3) |  | C61 | C81 | C50 | 120.2(4) |
| C71 | C24 | C37 | 122.5(3) |  | C49 | C85 | C11 | 120.5(3) |
| C50 | C25 | P1  | 120.2(2) |  | C42 | C1  | C21 | 116.6(3) |
| C66 | C25 | P1  | 121.0(2) |  | C58 | C5  | C14 | 119.9(3) |
| C66 | C25 | C50 | 118.7(3) |  | C2  | C3  | C36 | 119.8(4) |
| C41 | C26 | C37 | 115.8(3) |  | C3  | C2  | C51 | 120.1(4) |
| C65 | C26 | C37 | 120.9(3) |  | C69 | C6  | C65 | 113.5(3) |
| C65 | C26 | C41 | 123.1(3) |  | C80 | C7  | C38 | 120.8(3) |
| C33 | C28 | C15 | 115.7(3) |  | C75 | C10 | C47 | 120.5(4) |
| C77 | C29 | C43 | 120.1(3) |  |     |     |     |          |

**Table S5.** Optimization of reaction conditions for  $\alpha$ -alkylation in different solvents and bases.

| 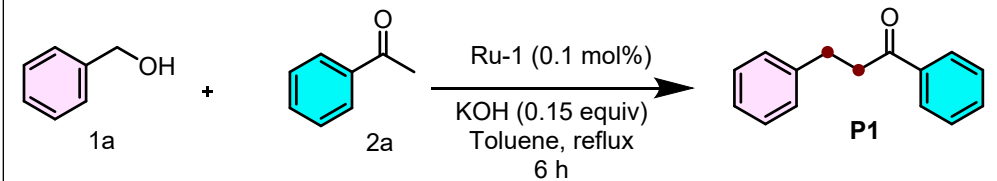 |                                      |                                |          |           |
|------------------------------------------------------------------------------------|--------------------------------------|--------------------------------|----------|-----------|
| Entry                                                                              | Catalyst (0.1 mol%)                  | Base                           | Solvent  | Yield (%) |
| 1                                                                                  | -                                    | KOH                            | Toluene  | Trace     |
| 2                                                                                  | L <sup>1</sup>                       | KOH                            | Toluene  | Trace     |
| 3                                                                                  | RuCl <sub>3</sub>                    | KOH                            | Toluene  | 15%       |
| 4                                                                                  | Ru(PPh <sub>3</sub> )Cl <sub>2</sub> | KOH                            | Toluene  | 42%       |
| 5                                                                                  | <b>Ru-1</b>                          | KOH                            | Toluene  | 92%       |
| 6                                                                                  | <b>Ru-1</b>                          | <sup>t</sup> BuOK              | Toluene  | 56%       |
| 7                                                                                  | <b>Ru-1</b>                          | NaOH                           | Toluene  | 52%       |
| 8                                                                                  | <b>Ru-1</b>                          | K <sub>2</sub> CO <sub>3</sub> | Toluene  | 36%       |
| 9                                                                                  | <b>Ru-1</b>                          | KOH                            | DMF      | 21%       |
| 10                                                                                 | <b>Ru-1</b>                          | KOH                            | DMSO     | 25%       |
| 11                                                                                 | <b>Ru-1</b>                          | KOH                            | O-xylene | 82%       |
| 12                                                                                 | <b>Ru-1</b>                          | KOH                            | dioxane  | 76%       |
| 13 <sup>a</sup>                                                                    | <b>Ru-1</b>                          | KOH                            | Toluene  | 70%       |
| 14 <sup>b</sup>                                                                    | <b>Ru-1 (0.005)</b>                  | KOH                            | Toluene  | 60%       |

Reaction condition: 1a (0.1 mmol), 2a (0.1 mmol), Cat. (0.1 mol%), base (0.15 equiv.), Solvent 2 mL at 120 °C for 6 h. Isolated Yield. <sup>a</sup>at 80 °C, <sup>b</sup>**Ru-1** (0.005 mol%).

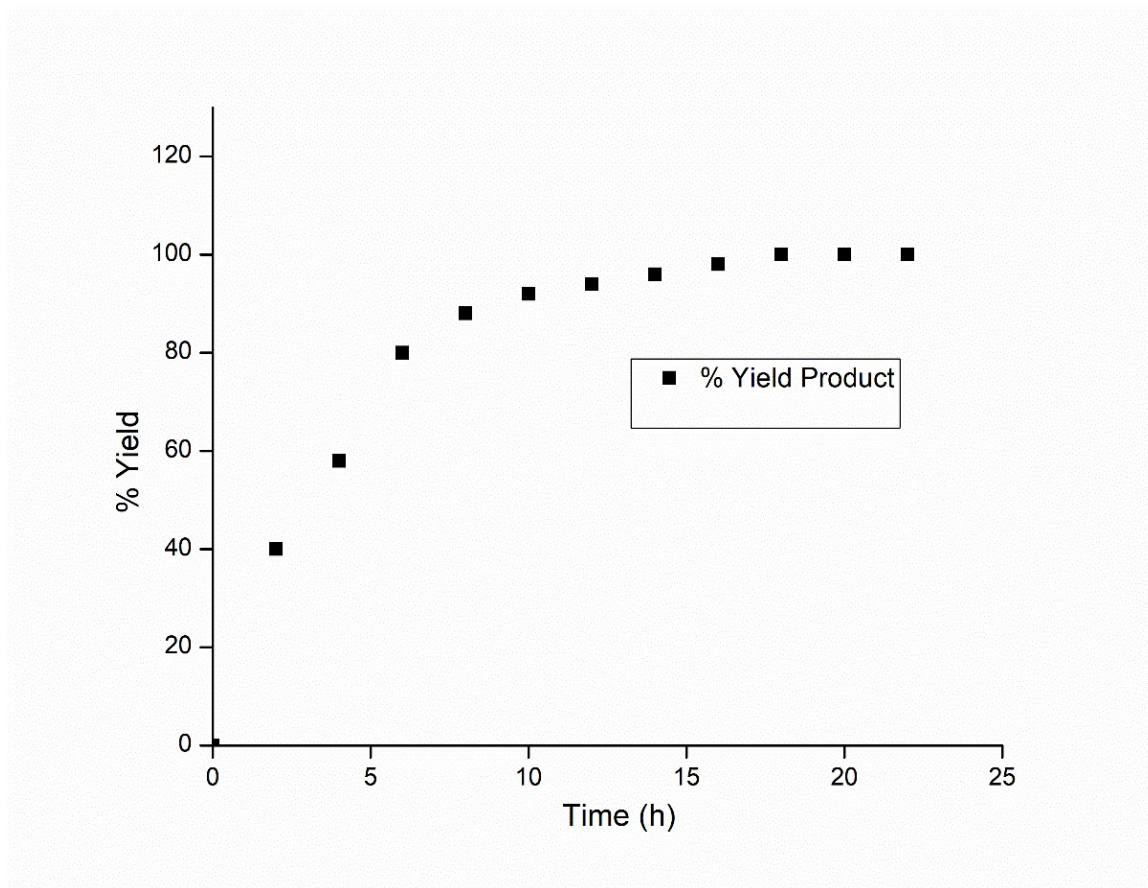

**Figure S7.** Time dependent C-C coupled product formation during the reaction. Reaction condition: Acetophenone (1 mmol), benzyl alcohol (1 mmol), Cat. (0.1 mol%), base (0.15 equiv.), Solvent 2 mL at 120 °C for 24 h.

**Table S6.** Effect of catalyst loading on the  $\alpha$ -alkylation of ketones using primary alcohols catalytic reaction

| Entry | Catalyst loading (mol%) | %Yield |
|-------|-------------------------|--------|
| 1     | 0.5                     | 94     |
| 2     | 0.1                     | 92     |
| 3     | 0.01                    | 84     |
| 4     | 0.001                   | 76     |

**Table S7. Catalytic performance metrics, including reactants, % yields, TON, TOF, and reaction conditions**

| S. No | Reactant(s)-1           | Reactant(s) -2                                   | Compounds                                                  | % *Yield | TON/ TOF      |
|-------|-------------------------|--------------------------------------------------|------------------------------------------------------------|----------|---------------|
| 1     | Phenylmethanol          | Acetophenone                                     | 1,3-diphenylpropan-1-one                                   | 88       | 114/19        |
| 2     | Phenylmethanol          | 4'-Methylacetophenone                            | 3-phenyl-1-(p-tolyl)propan-1-one                           | 80       | 116/19<br>.33 |
| 3     | Phenylmethanol          | 4'-Methoxyacetophenone                           | 1-(4-methoxyphenyl)-3-phenylpropan-1-one                   | 92       | 126/21        |
| 4     | Phenylmethanol          | 4'-Chloroacetophenone                            | 1-(4-chlorophenyl)-3-phenylpropan-1-one                    | 72       | 102/17        |
| 5     | Phenylmethanol          | 4'-Bromoacetophenone                             | 1-(4-bromophenyl)-3-phenylpropan-1-one                     | 74       | 104/17<br>.33 |
| 6     | Phenylmethanol          | 3-Acetylpyridine                                 | 3-phenyl-1-(pyridin-3-yl)propan-1-one                      | 86       | 98/16.<br>33  |
| 7     | Phenylmethanol          | 4'-(Trifluoromethyl)acetophenone                 | 3-phenyl-1-(4-(trifluoromethyl)phenyl)propan-1-one         | 78       | 93/15.<br>50  |
| 8     | Phenylmethanol          | 1-(3-Methoxyphenyl)ethan-1-one                   | 1-(3-methoxyphenyl)-3-phenylpropan-1-one                   | 89       | 120/20        |
| 9     | Phenylmethanol          | 1-(3-chlorophenyl)ethan-1-one                    | 1-(3-chlorophenyl)-3-phenylpropan-1-one                    | 73       | 106/17<br>.66 |
| 10    | Phenylmethanol          | 1-(2-methoxyphenyl)ethan-1-one                   | 1-(2-methoxyphenyl)-3-phenylpropan-1-one                   | 82       | 118/19<br>.66 |
| 11    | Phenylmethanol          | 1-(2-chlorophenyl)ethan-1-one                    | 1-(2-chlorophenyl)-3-phenylpropan-1-one                    | 76       | 104/1.<br>33  |
| 12    | Phenylmethanol          | 1-mesitylethan-1-one                             | 1-mesityl-3-phenylpropan-1-one                             | 82       | 122/20<br>.33 |
| 13    | Phenylmethanol          | 1-(naphthalen-2-yl)ethan-1-one                   | 1-(naphthalen-2-yl)-3-phenylpropan-1-one                   | 78       | 121/20<br>.16 |
| 14    | Phenylmethanol          | 1-(benzo[d][1,3]dioxol-5-yl)ethan-1-one          | 1-(benzo[d][1,3]dioxol-5-yl)-3-phenylpropan-1-one          | 76       | 115/19<br>.16 |
| 15    | Phenylmethanol          | 1-cyclopropylethan-1-one                         | 1-cyclopropyl-3-phenylpropan-1-one                         | 72       | 113/18<br>.83 |
| 16    | Phenylmethanol          | 1-(thiophen-2-yl)ethan-1-one                     | 3-phenyl-1-(thiophen-2-yl)propan-1-one                     | 73       | 108/18<br>.64 |
| 17    | Phenylmethanol          | 1-(1,2,3,4-tetrahydronaphthalen-2-yl)ethan-1-one | 3-phenyl-1-(1,2,3,4-tetrahydronaphthalen-2-yl)propan-1-one | 78       | 122/20<br>.14 |
| 18    | 1,3-phenylenedimethanol | 1-(p-tolyl)ethan-1-one                           | 3,3'-(1,3-phenylene)bis(1-(p-tolyl)propan-1-one)           | 80       | 114/18<br>.32 |
| 19    | 4-Methylbenzyl alcohol  | Acetophenone                                     | 1-phenyl-3-(p-tolyl)propan-1-one                           | 82       | 116/19<br>.33 |
| 20    | 4-Methoxybenzyl alcohol | Acetophenone                                     | 3-(4-methoxyphenyl)-1-phenylpropan-1-one                   | 80       | 124/20<br>.66 |
| 21    | 4-Chlorobenzyl alcohol  | Acetophenone                                     | 3-(4-chlorophenyl)-1-phenylpropan-1-one                    | 78       | 103/17<br>.16 |

|    |                                     |                                          |                                                         |    |               |
|----|-------------------------------------|------------------------------------------|---------------------------------------------------------|----|---------------|
| 22 | (4-(trifluoromethyl)phenyl)methanol | Acetophenone                             | 1-phenyl-3-(4-(trifluoromethyl)phenyl)propan-1-one      | 72 | 96/16         |
| 23 | methyl 4-(hydroxymethyl)benzoate    | Acetophenone                             | methyl 4-(3-oxo-3-phenylpropyl)benzoate                 | 78 | 119/19<br>.83 |
| 24 | (4-isocyanophenyl)methanol          | Acetophenone                             | 3-(4-isocyanophenyl)-1-phenylpropan-1-one               | 70 | 108/18        |
| 25 | 4-(hydroxymethyl)benzoic acid       | Acetophenone                             | 4-(3-oxo-3-phenylpropyl)benzoic acid                    | 71 | 106/17<br>.66 |
| 26 | (4-nitrophenyl)methanol             | Acetophenone                             | 3-(4-nitrophenyl)-1-phenylpropan-1-one                  | 62 | 92/14.<br>24  |
| 27 | (4-bromophenyl)methanol             | Acetophenone                             | 3-(4-bromophenyl)-1-phenylpropan-1-one                  | 68 | 94/16.<br>22  |
| 28 | naphthalen-1-ylmethanol             | Acetophenone                             | 3-(naphthalen-1-yl)-1-phenylpropan-1-one                | 79 | 120/14        |
| 29 | (4-(tert-butyl)phenyl)methanol      | Acetophenone                             | 3-(4-(tert-butyl)phenyl)-1-phenylpropan-1-one           | 80 | 104/16<br>.24 |
| 30 | (3-methoxyphenyl)methanol           | Acetophenone                             | 3-(3-methoxyphenyl)-1-phenylpropan-1-one                | 80 | 106/18<br>.23 |
| 31 | (2,4-dimethoxyphenyl)methanol       | Acetophenone                             | 3-(2,4-dimethoxyphenyl)-1-phenylpropan-1-one            | 82 | 112/18<br>.14 |
| 32 | Ferrocenemethanol                   | Acetophenone                             | 3-phenyl-1-(ferrocynyl)propan-1-one                     | 80 | 115/16<br>.02 |
| 33 | Acetophenone                        | pentan-1-ol                              | 1-phenyloctan-1-one                                     | 75 | 106/18<br>.60 |
| 34 | Acetophenone                        | decan-1-ol                               | 1-phenyltridecan-1-one                                  | 73 | 104/12<br>.22 |
| 35 | Acetophenone                        | 2,6-dimethylhept-5-en-1-ol               | 5,9-dimethyl-1-phenyldec-8-en-1-one                     | 75 | 108/11<br>.24 |
| 36 | Acetophenone                        | (Z)-hexadec-7-en-1-ol                    | (Z)-1-phenylnonadec-10-en-1-one                         | 76 | 106/12<br>.24 |
| 37 | (4-methoxyphenyl)methanol           | 1-(2,4-dimethoxyphenyl)ethan-1-one       | 1-(2,4-Dimethoxyphenyl)-3-(4-methoxyphenyl)-1-propanone | 70 | 118/17<br>.24 |
| 38 | (2,4-dimethoxyphenyl)methanol       | 1-(4-hydroxyphenyl)ethan-1-one           | Lourein A                                               | 73 | 122/13<br>.54 |
| 39 | phenylmethanol                      | 1-(2-hydroxy-6-methoxyphenyl)ethan-1-one | Uvangoletin                                             | 79 | 112/14<br>.26 |
| 40 | (2,4,6-trimethoxyphenyl)methanol    | 1-(4-hydroxyphenyl)ethan-1-one           | Lourein B                                               | 79 | 106/16<br>.02 |

Reaction conditions: Alcohol (2.2 mmol) and Ketone (2 mmol), catalyst (0.1 mol %), KOH (0.15eq), Toluene (4 mL), Temperature 120 °C, and reaction time 6 h. TON = mmol of substrate/mmol of catalyst; TOF = TON/Time (h). TON = turn over number and TOF = turn over frequency.

\* Yields are reported as isolated yields or reaction after column chromatography.

## $^1\text{H}$ and $^{13}\text{C}$ NMR of C-C products:

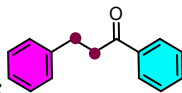

### Synthesis of P1:

**1,3-diphenylpropan-1-one (P1).** 44.4 mg; 88% isolated yield; white solid:  $^1\text{H}$  NMR (400 MHz,  $\text{CDCl}_3$ ):  $\delta = 7.96$  (d, 2H), 7.55 (t, 1H), 7.45 (t, 2H), 7.32 - 7.19 (m, 5H), 3.31 (t, 2H), 3.08 (t, 2H).  $^{13}\text{C}\{^1\text{H}\}$  NMR (125 MHz,  $\text{CDCl}_3$ ):  $\delta = 199.3, 141.4, 137.0, 133.2, 128.7, 128.6, 128.5, 128.2, 126.3, 40.6, 30.3$ .

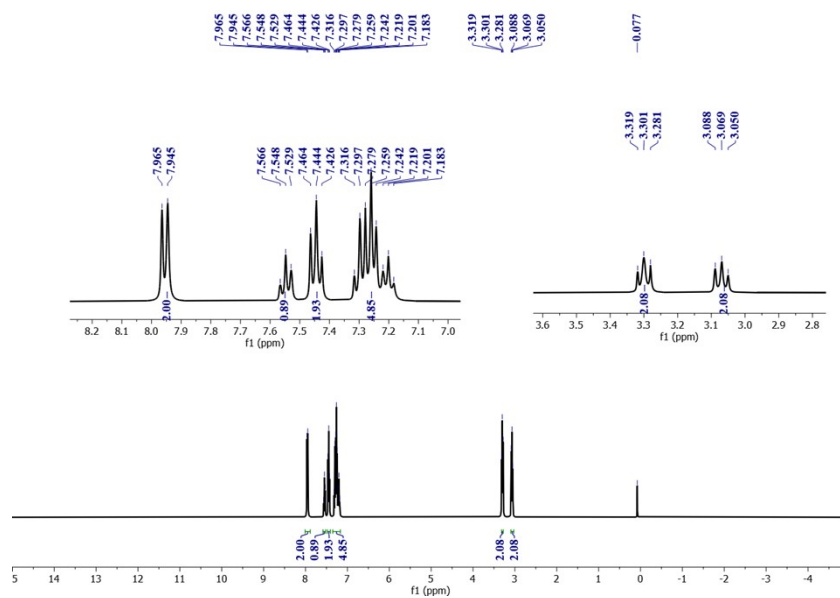

Figure S8.  $^1\text{H}$  NMR Spectrum (400 MHz,  $\text{CDCl}_3$ ) of P1.

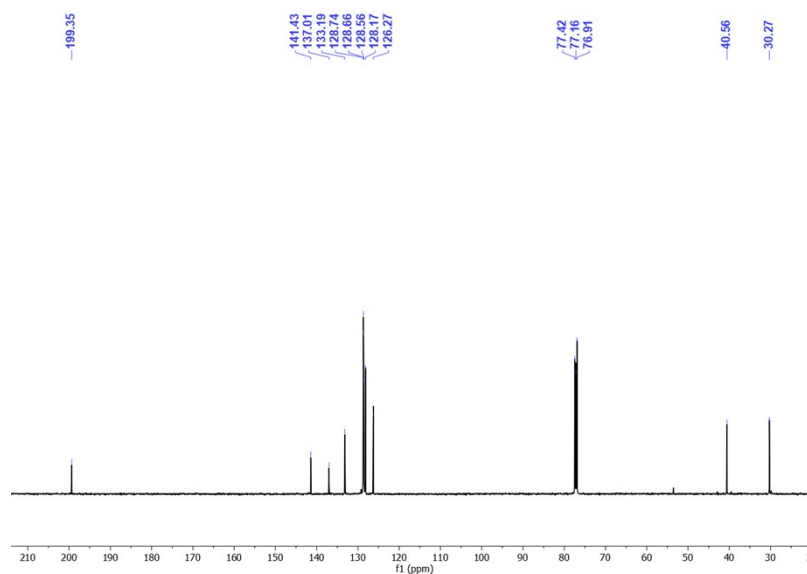

Figure S9. (a)  $^{13}\text{C}\{^1\text{H}\}$  NMR Spectrum (125 MHz,  $\text{CDCl}_3$ ) of P1.

### Synthesis of P2:

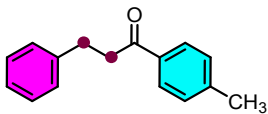

**3-phenyl-1-(p-tolyl)propan-1-one (P2).** 40.2 mg; 80% isolated yield; brown solid:  $^1\text{H NMR}$  (400 MHz,  $\text{CDCl}_3$ ):  $\delta$  = 7.86 (d, 2H), 7.31 – 7.18 (m, 7H), 3.27 (t, 2H), 3.05 (t, 2H), 2.40 (s, 3H).  $^{13}\text{C}\{^1\text{H}\}$  NMR (100 MHz,  $\text{CDCl}_3$ ):  $\delta$  = 199.0, 144.0, 141.5, 134.5, 129.4, 128.6, 128.5, 128.3, 126.2, 40.5, 30.4, 21.8.

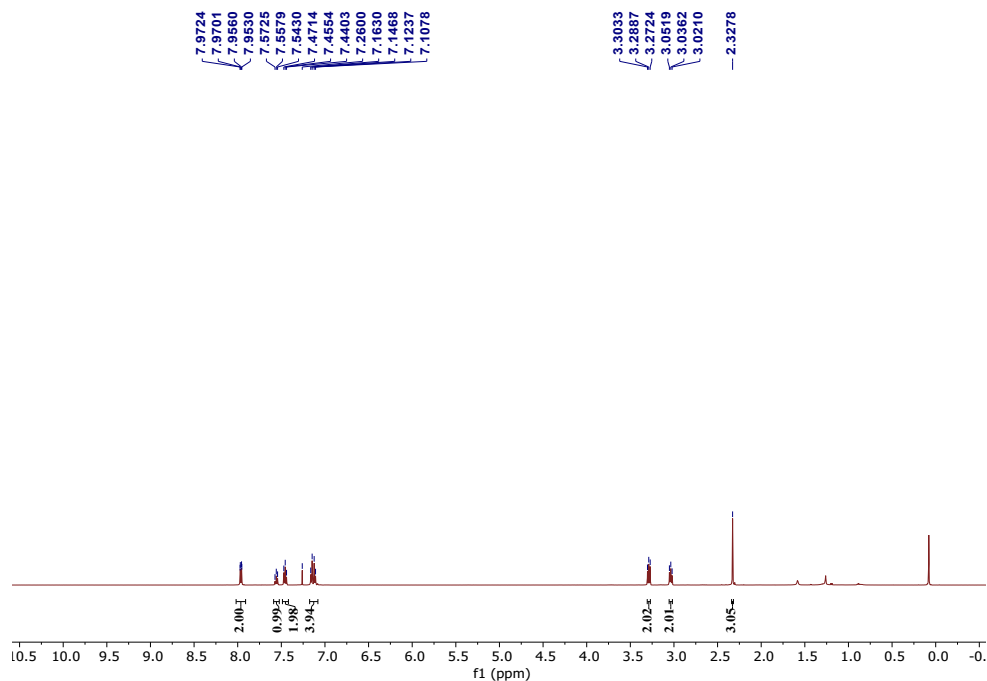

Figure S10.  $^1\text{H NMR}$  Spectrum (400 MHz,  $\text{CDCl}_3$ ) of P2.

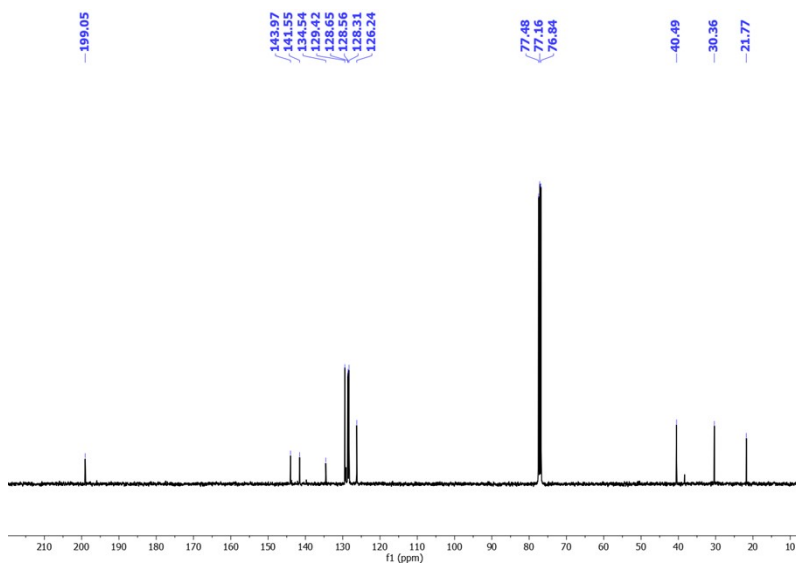

Figure S11.  $^{13}\text{C}\{^1\text{H}\}$  NMR Spectrum (125 MHz,  $\text{CDCl}_3$ ) of P2

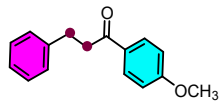

### Synthesis of P3:

**1-(4-methoxyphenyl)-3-phenylpropan-1-one (P3).** 40.6 mg; 92% isolated yield; white solid:  $^1\text{H}$  NMR (400 MHz,  $\text{CDCl}_3$ ):  $\delta = 7.53 - 7.48$  (m, 2H),  $7.36 - 7.21$  (m, 6H),  $7.10 - 7.07$  (m, 1H),  $3.83$  (s, 3H),  $3.28$  (t,  $J_{\text{H-H}} = 7.2$  Hz, 2H),  $3.05$  (t,  $J_{\text{H-H}} = 7.8$  Hz, 2H).  $^{13}\text{C}\{^1\text{H}\}$  NMR (100 MHz,  $\text{CDCl}_3$ ):  $\delta = 198.0, 163.6, 141.6, 130.5, 130.2, 128.6, 128.5, 126.2, 113.9, 55.6, 40.3, 30.5$ .

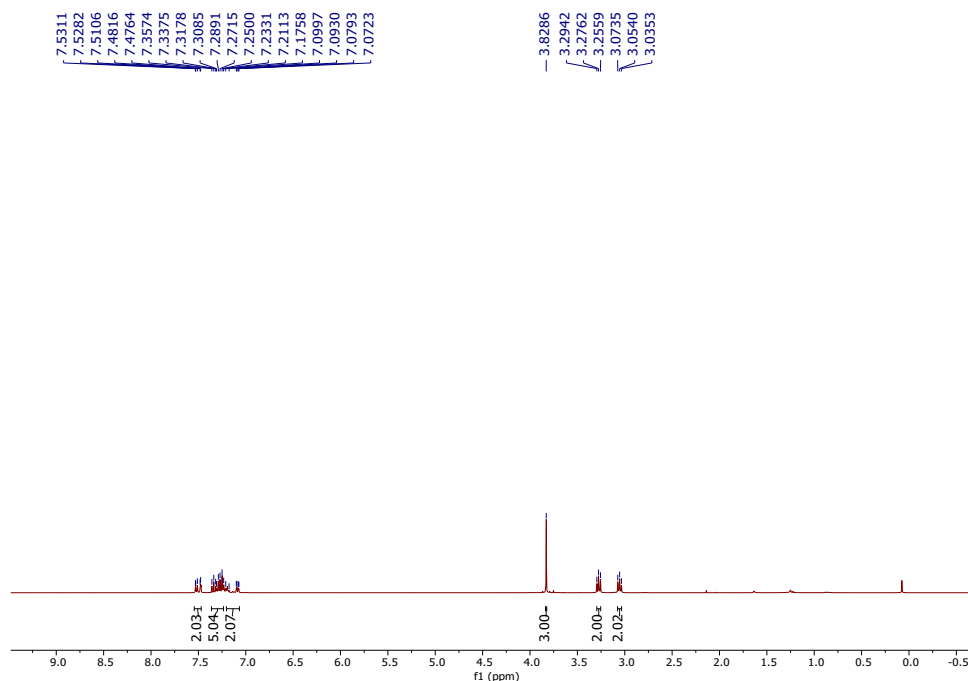

Figure S12.  $^1\text{H}$  NMR Spectrum (400 MHz,  $\text{CDCl}_3$ ) of P3.

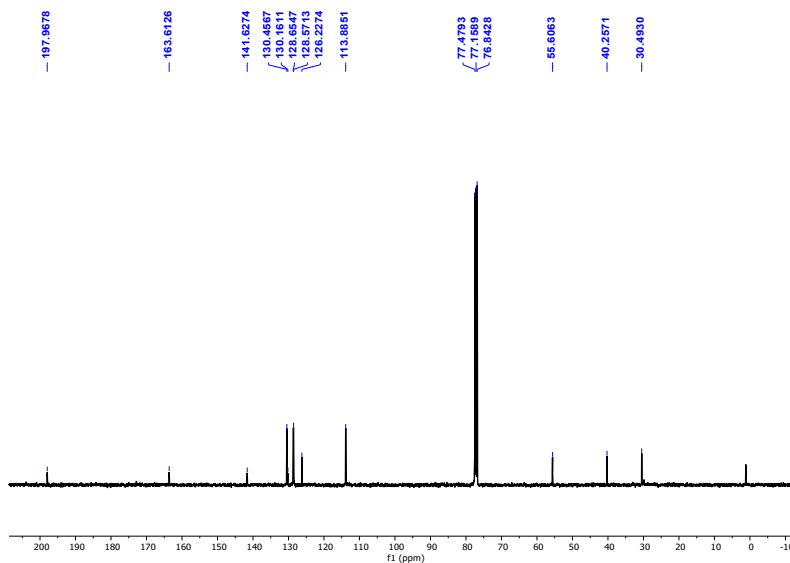

Figure S13.  $^{13}\text{C}\{^1\text{H}\}$  NMR Spectrum (125 MHz,  $\text{CDCl}_3$ ) of P3

### Synthesis of P4:

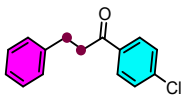

**1-(4-chlorophenyl)-3-phenylpropan-1-one (P4).** 45.2 mg; 72% isolated yield; white solid:  $^1\text{H}$  NMR (400 MHz,  $\text{CDCl}_3$ ):  $\delta$  = 7.88 (d, 2H), 7.41 (d, 2H), 7.31 – 7.20 (m, 5H), 3.26 (t, 2H), 3.06 (t, 2H).  $^{13}\text{C}\{^1\text{H}\}$  NMR (100 MHz,  $\text{CDCl}_3$ ):  $\delta$  = 198.1, 141.2, 139.6, 135.3, 129.6, 129.1, 128.7, 128.5, 126.4, 40.6, 30.2.

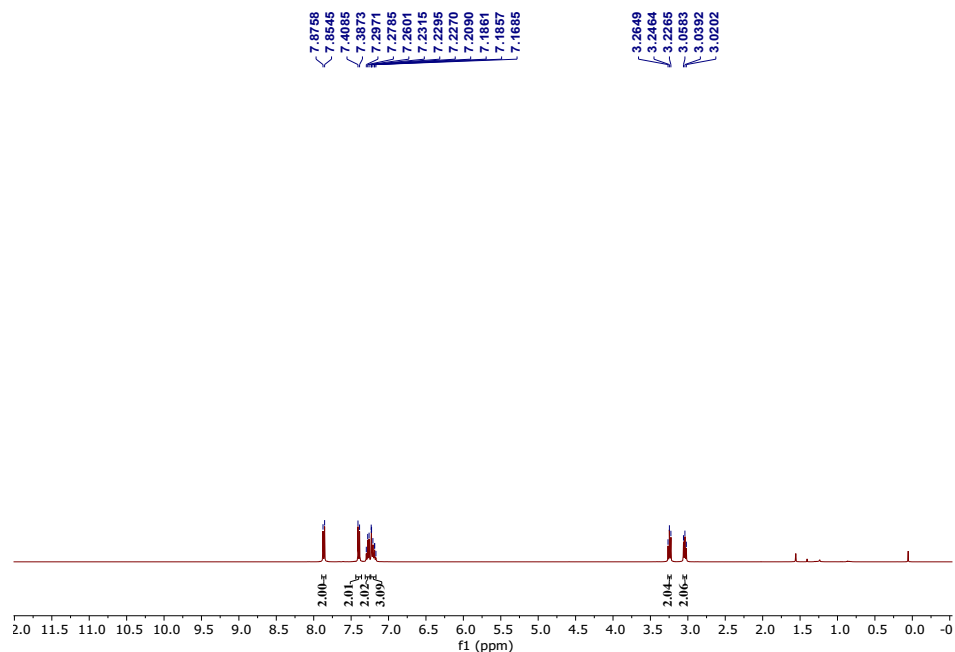

Figure S14.  $^1\text{H}$  NMR Spectrum (400 MHz,  $\text{CDCl}_3$ ) of P4.

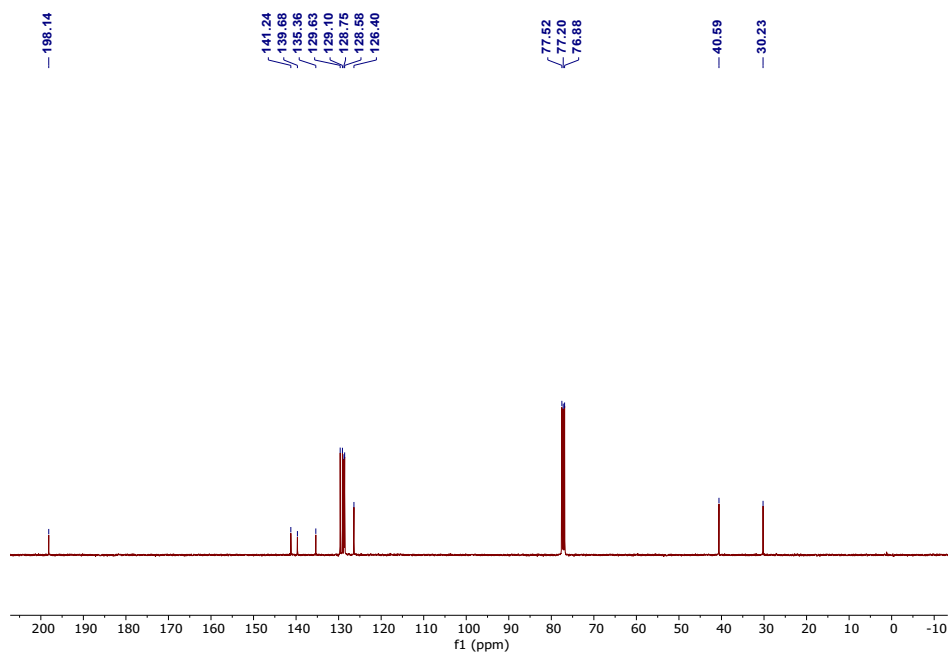

Figure S15.  $^{13}\text{C}\{^1\text{H}\}$  NMR Spectrum (125 MHz,  $\text{CDCl}_3$ ) of P4

### Synthesis of P5:

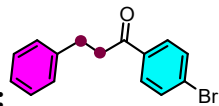

**1-(4-bromophenyl)-3-phenylpropan-1-one (P5).** 68.6 mg; 74% isolated yield; white solid:  $^1\text{H NMR}$  (500 MHz,  $\text{CDCl}_3$ ):  $\delta = 7.80$  (d, 2H), 7.58 (d, 2H), 7.29 (t, 2H), 7.24 - 7.19 (m, 3H), 3.25 (t, 2H), 3.05 (t, Hz, 2H).  $^{13}\text{C}\{^1\text{H}\}$  NMR (125 MHz,  $\text{CDCl}_3$ ):  $\delta = 198.3, 141.2, 135.7, 132.0, 129.7, 129.6, 128.7, 128.5, 126.4, 40.5, 30.2$ .

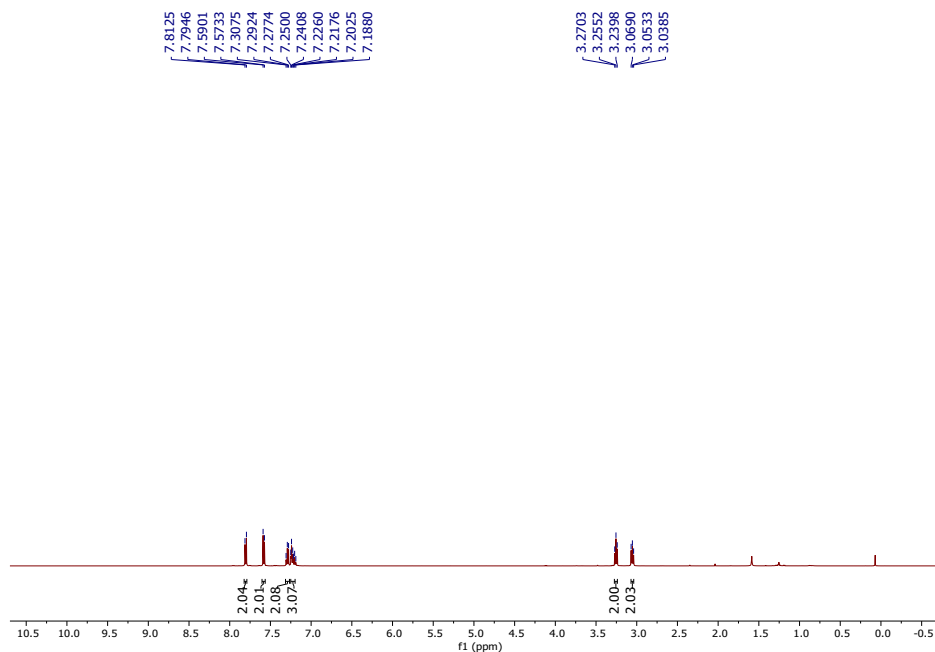

Figure S16.  $^1\text{H NMR}$  Spectrum (400 MHz,  $\text{CDCl}_3$ ) of P5.

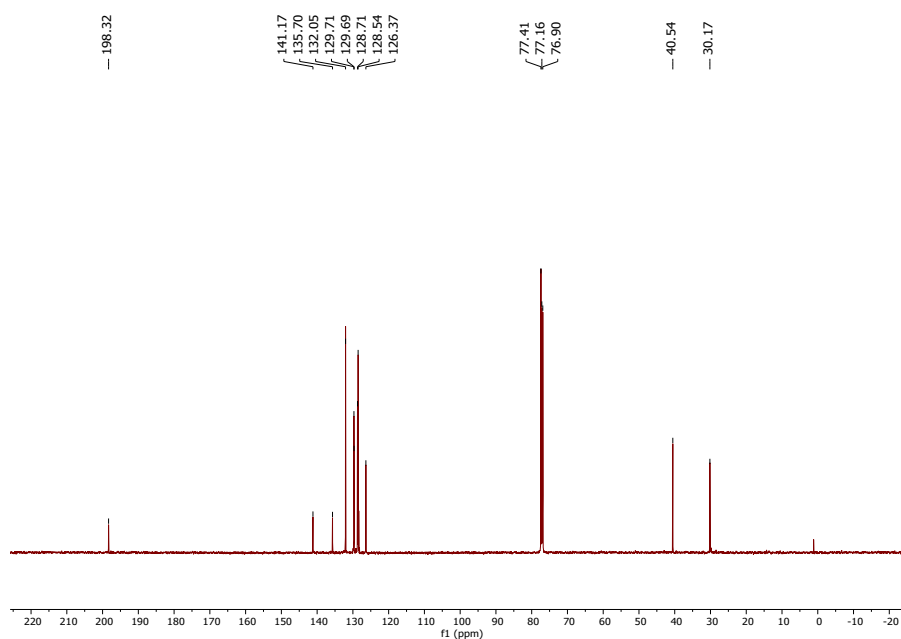

Figure S17.  $^{13}\text{C NMR}$  Spectrum (125 MHz,  $\text{CDCl}_3$ ) of P5

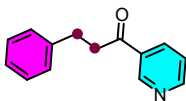

### Synthesis of P6:

**3-phenyl-1-(pyridin-3-yl)propan-1-one (P6).** 50.4 mg; 86% isolated yield; yellow oil:  $^1\text{H NMR}$  (400 MHz,  $\text{CDCl}_3$ ):  $\delta$  = 9.12(s, 1H), 8.73 - 8.72 (m, 1H), 8.19 - 8.17 (m, 1H), 7.38 - 7.35 (m, 1H), 7.29 - 7.16 (m, 5H), 3.28 (t, 2H), 3.05 (t, 2H).  $^{13}\text{C NMR}$  (100 MHz,  $\text{CDCl}_3$ ):  $\delta$  = 198.1, 153.5, 149.6, 140.8, 135.4, 132.1, 128.7, 128.5, 126.4, 123.7, 40.7, 29.8.

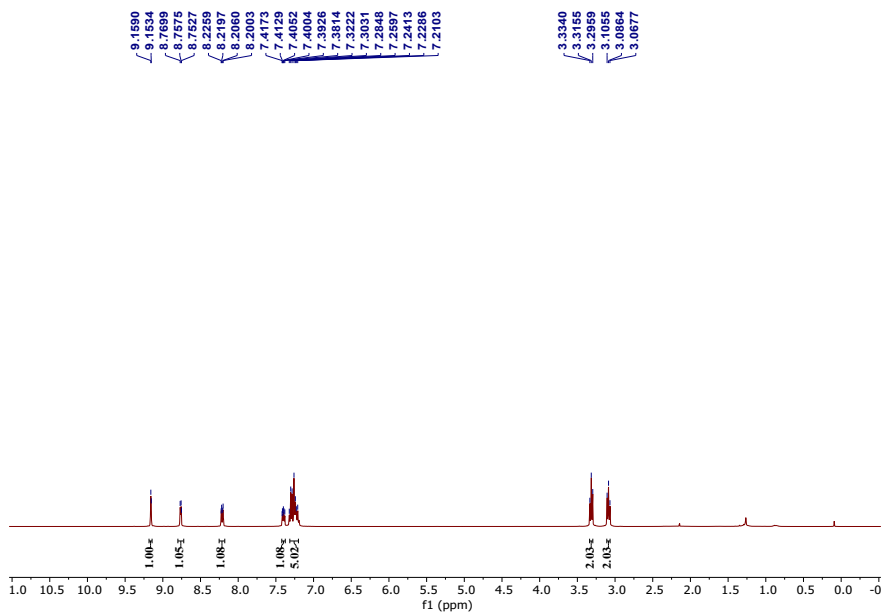

Figure S18.  $^1\text{H NMR}$  Spectrum (400 MHz,  $\text{CDCl}_3$ ) of P6.

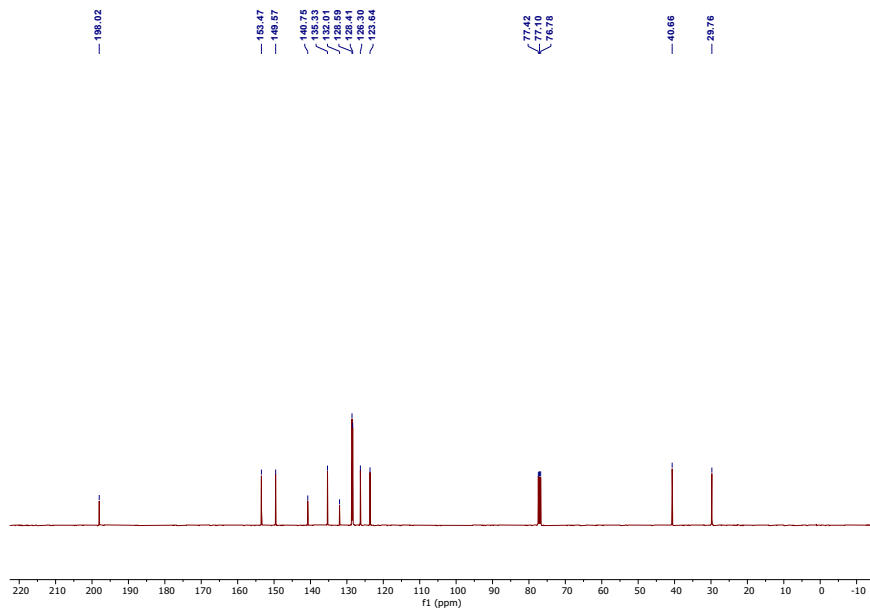

Figure S19.  $^{13}\text{C}\{^1\text{H}\}$  NMR Spectrum (100 MHz,  $\text{CDCl}_3$ ) of P6.

## Synthesis of P7:

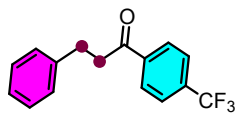

**3-phenyl-1-(4-(trifluoromethyl)phenyl)propan-1-one (P7).** 68.4

mg; 78% isolated yield; yellow oil:  $^1\text{H NMR}$  (400 MHz,  $\text{CDCl}_3$ ):  $\delta$  = 8.05 (d, H), 7.72 (d 2H), 7.33 – 7.22 (m, 5H), 3.33 (t, 2H), 3.09 (t, 2H).  $^{13}\text{C}\{^1\text{H}\}$  NMR (100 MHz,  $\text{CDCl}_3$ ):  $\delta$  = 198.3, 141.0, 139.6, 134.4 (q,  $J_{\text{C-F}}$  = 33 Hz), 128.7, 128.5, 128.4, 126.4, 125.8 (d,  $J_{\text{C-F}}$  = 4.0 Hz), 123.7 (d,  $J_{\text{C-F}}$  = 272 Hz), 40.8, 30.0.

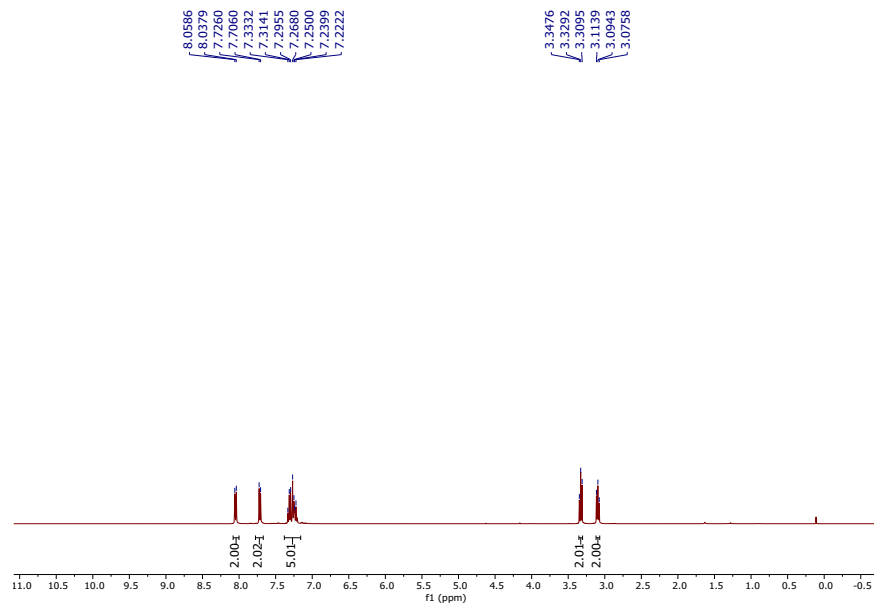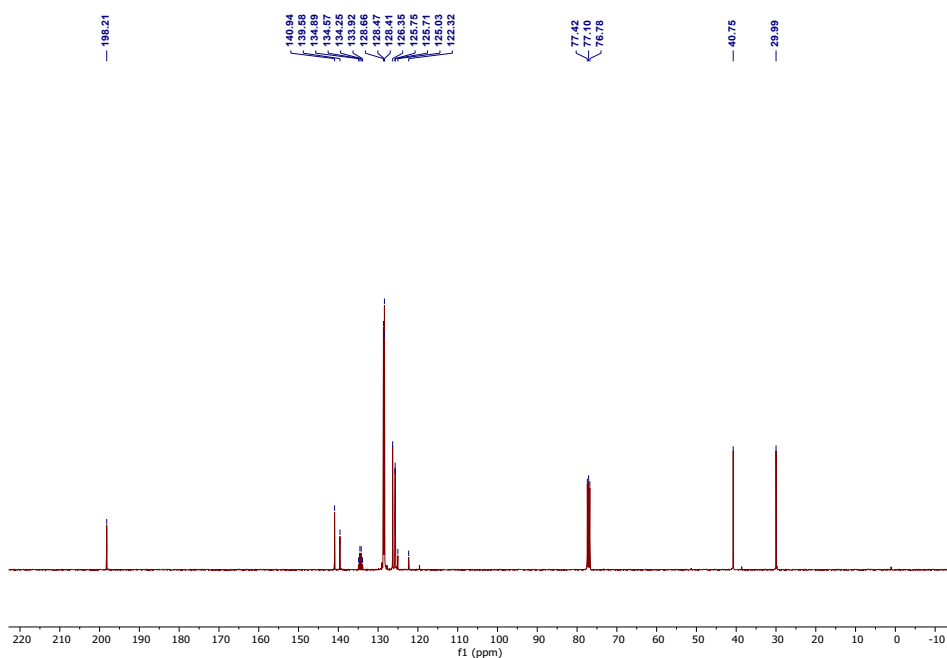

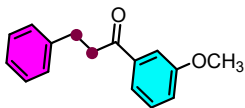

### Synthesis of P8:

**1-(3-methoxyphenyl)-3-phenylpropan-1-one (P8).** 40.4 mg; 89% isolated yield; yellow oil:  $^1\text{H NMR}$  (400 MHz,  $\text{CDCl}_3$ ):  $\delta = 7.55 - 7.49$  (m, 2H), 7.37 - 7.19 (m, 6H), 7.11 - 7.09 (m, 1H), 3.84 (s, 3H), 3.29 (t, 2H), 3.07 (t, 2H).  $^{13}\text{C}\{^1\text{H}\}$  NMR (100 MHz,  $\text{CDCl}_3$ ):  $\delta = 199.1, 159.9, 141.3, 138.3, 129.6, 128.6, 128.5, 126.2, 120.7, 119.6, 112.3, 55.5, 40.6, 30.2$ .

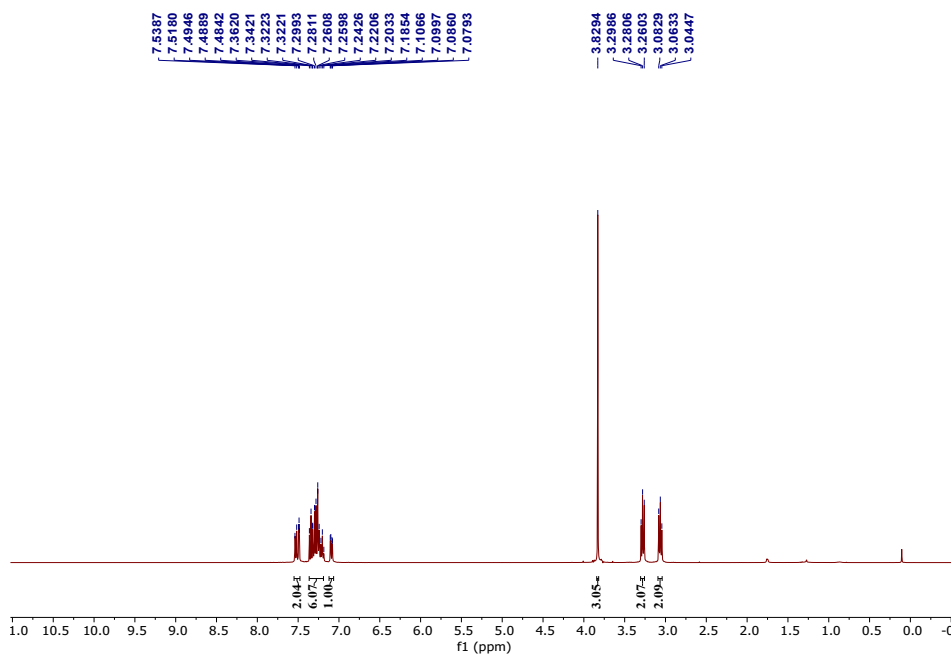

Figure S22.  $^1\text{H NMR}$  Spectrum (400 MHz,  $\text{CDCl}_3$ ) of P8.

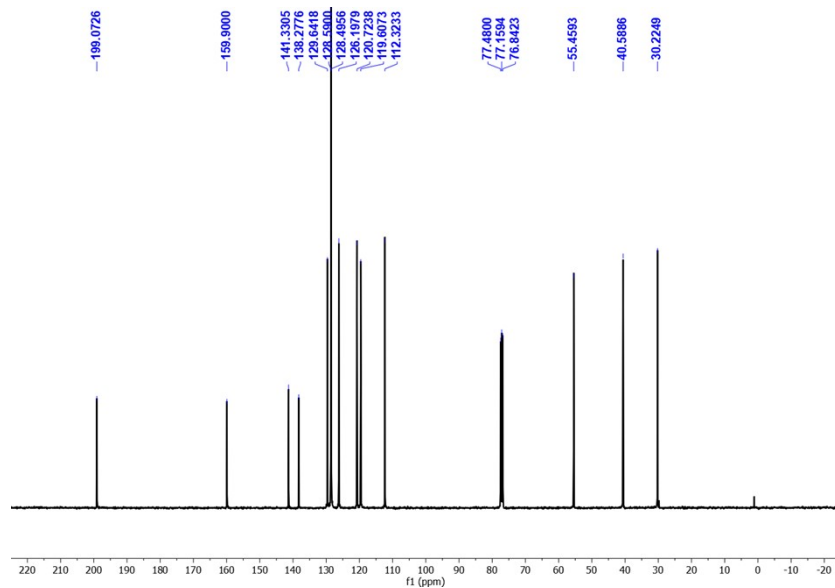

Figure S23.  $^{13}\text{C}\{^1\text{H}\}$  NMR Spectrum (100 MHz,  $\text{CDCl}_3$ ) of P8.

### Synthesis of P9:

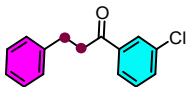

**1-(3-chlorophenyl)-3-phenylpropan-1-one (P9).** 60.8 mg; 73% isolated yield; pale yellow oil:  $^1\text{H}$  NMR (400 MHz,  $\text{CDCl}_3$ ):  $\delta$  = 7.91 (s, 1H), 7.81 (d, 1H), 7.52 – 7.50 (m, 1H), 7.40 – 7.35 (m, 1H), 7.32 – 7.19 (m, 5H), 3.27 (t, 2H), 3.03 (t, 2H).  $^{13}\text{C}\{^1\text{H}\}$  NMR (100 MHz,  $\text{CDCl}_3$ ):  $\delta$  = 198.0, 141.1, 138.5, 135.1, 133.1, 130.1, 128.7, 128.5, 128.3, 126.3, 126.2, 40.6, 30.0.

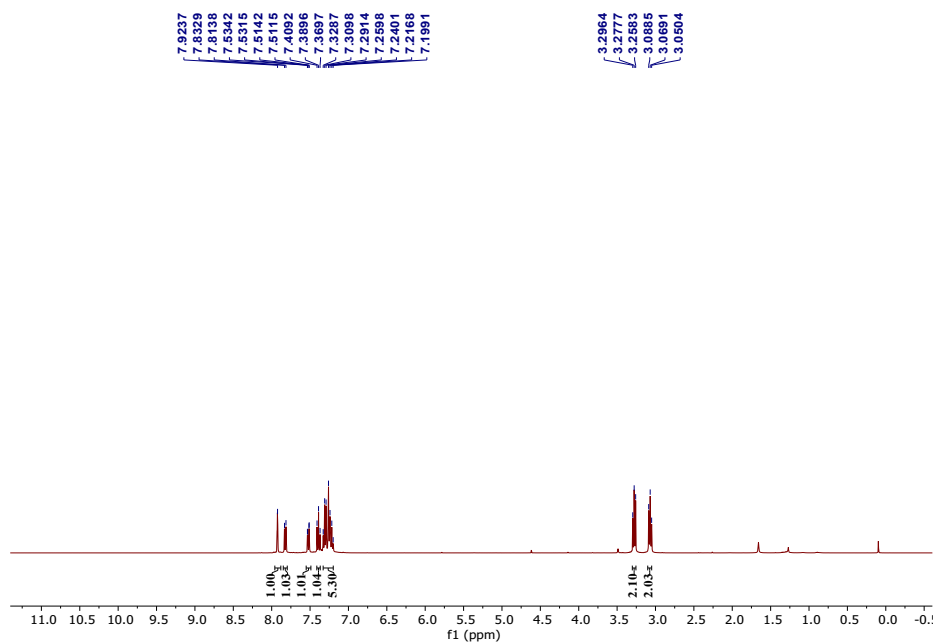

Figure S24.  $^1\text{H}$  NMR Spectrum (400 MHz,  $\text{CDCl}_3$ ) of P9.

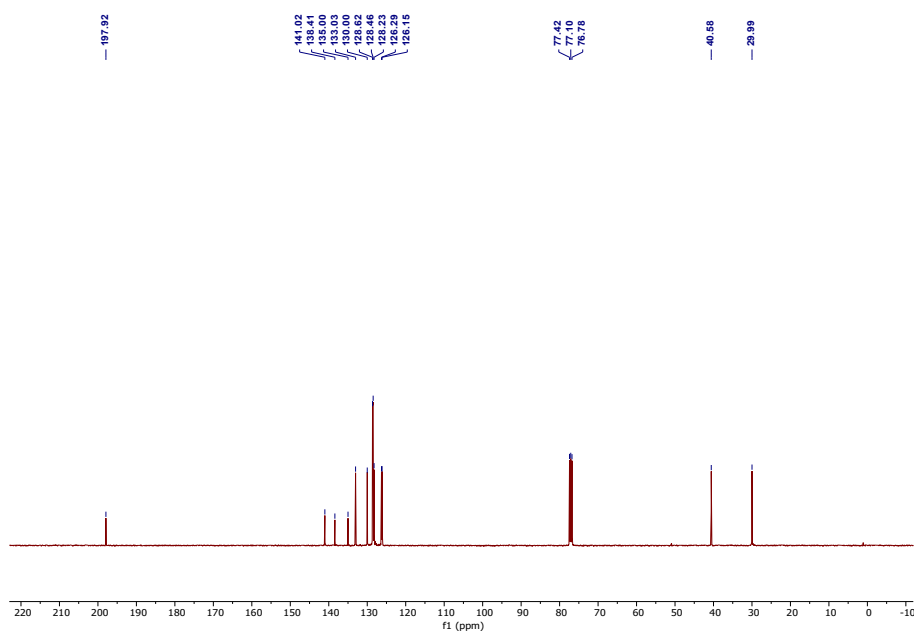

Figure S25.  $^{13}\text{C}\{^1\text{H}\}$  NMR Spectrum (100 MHz,  $\text{CDCl}_3$ ) of P9.

### Synthesis of P10:

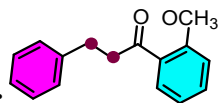

**1-(2-methoxyphenyl)-3-phenylpropan-1-one (P10).** 36.8 mg; 82% isolated yield; yellow oil:  $^1\text{H NMR}$  (400 MHz,  $\text{CDCl}_3$ ):  $\delta = 7.71 - 7.68$  (m, 1H),  $7.48 - 7.43$  (m, 1H),  $7.31 - 7.18$  (m, 5H),  $7.02 - 6.95$  (m, 2H),  $3.88$  (s, 3H),  $3.31$  (t,  $J_{\text{H-H}} = 7.4$  Hz, 2H),  $3.02$  (t,  $J_{\text{H-H}} = 8.5$  Hz, 2H).  $^{13}\text{C}\{^1\text{H}\}$  NMR (100 MHz,  $\text{CDCl}_3$ ):  $\delta = 201.8, 158.6, 141.8, 133.5, 130.5, 128.6, 128.5, 128.3, 126.0, 120.8, 111.6, 55.6, 45.5, 30.6$ .

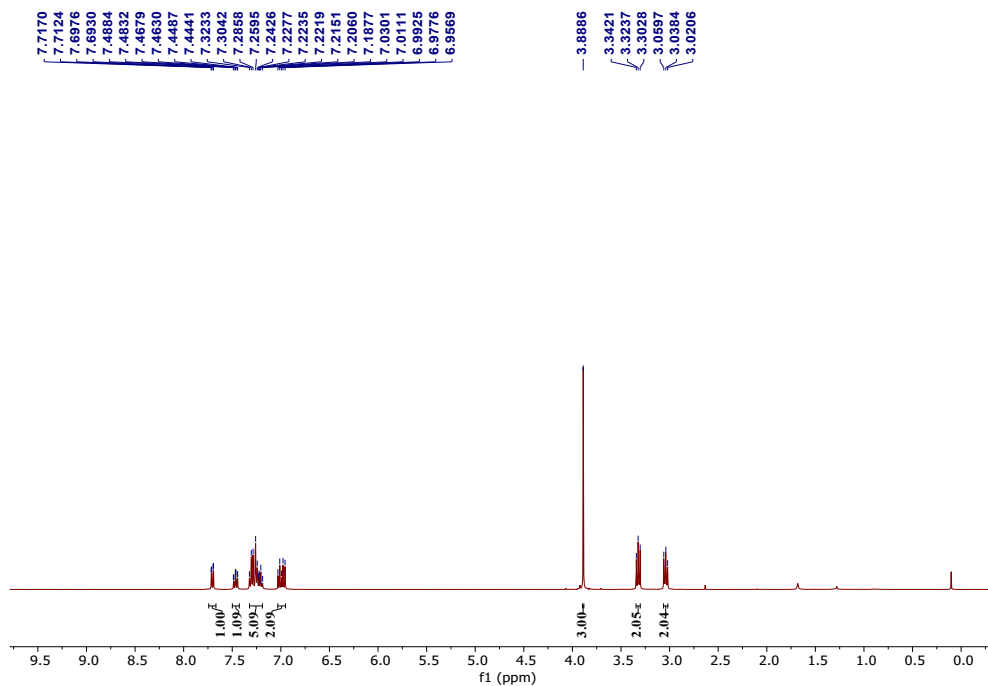

Figure S26.  $^1\text{H NMR}$  Spectrum (400 MHz,  $\text{CDCl}_3$ ) of P10.

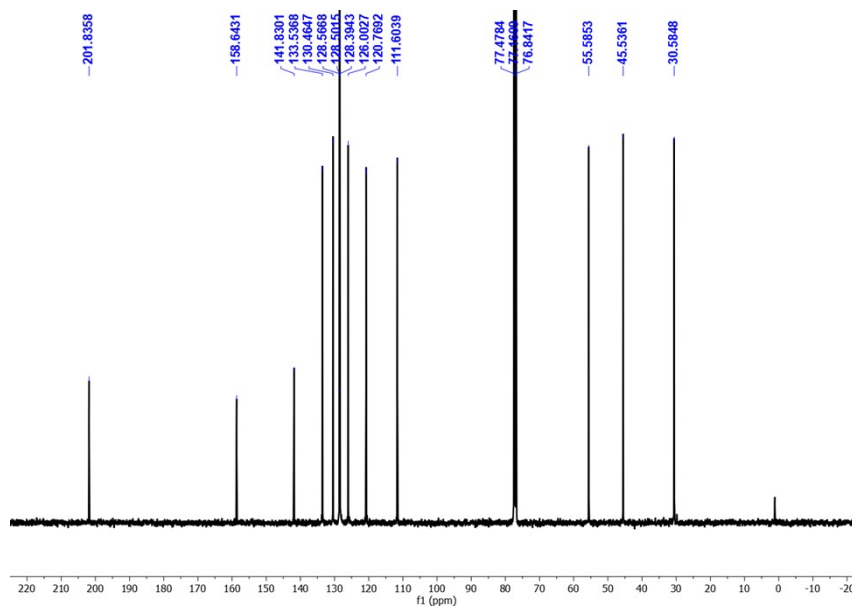

Figure S27.  $^{13}\text{C}\{^1\text{H}\}$  NMR Spectrum (100 MHz,  $\text{CDCl}_3$ ) of P10.

### Synthesis of P11:

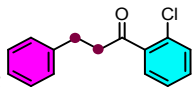

**1-(2-chlorophenyl)-3-phenylpropan-1-one (P11).** 62.4 mg; 76% isolated yield; white solid:  $^1\text{H}$  NMR (400 MHz,  $\text{CDCl}_3$ ):  $\delta = 7.39 - 7.33$  (m, 3H),  $7.30 - 7.24$  (m, 3H),  $7.22 - 7.18$  (m, 3H),  $3.26$  (t, 2H),  $3.04$  (t, 2H).  $^{13}\text{C}\{^1\text{H}\}$  NMR (125 MHz,  $\text{CDCl}_3$ ):  $\delta = 202.7, 140.9, 139.5, 131.8, 131.0, 130.6, 129.0, 128.6, 128.5, 127.0, 126.3, 44.7, 30.3$ .

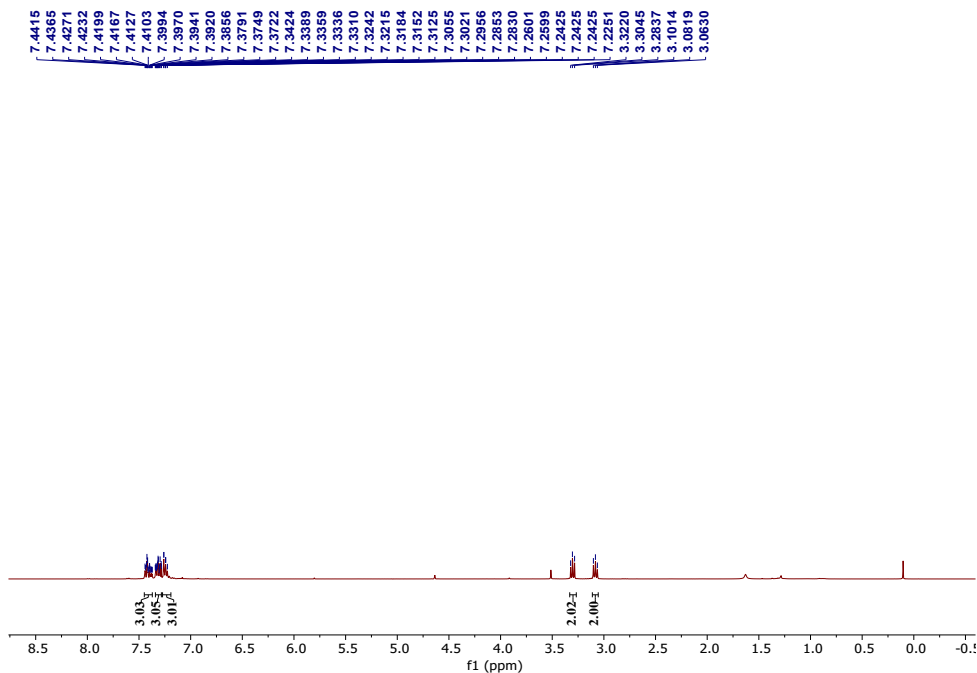

Figure S28.  $^1\text{H}$  NMR Spectrum (400 MHz,  $\text{CDCl}_3$ ) of P11.

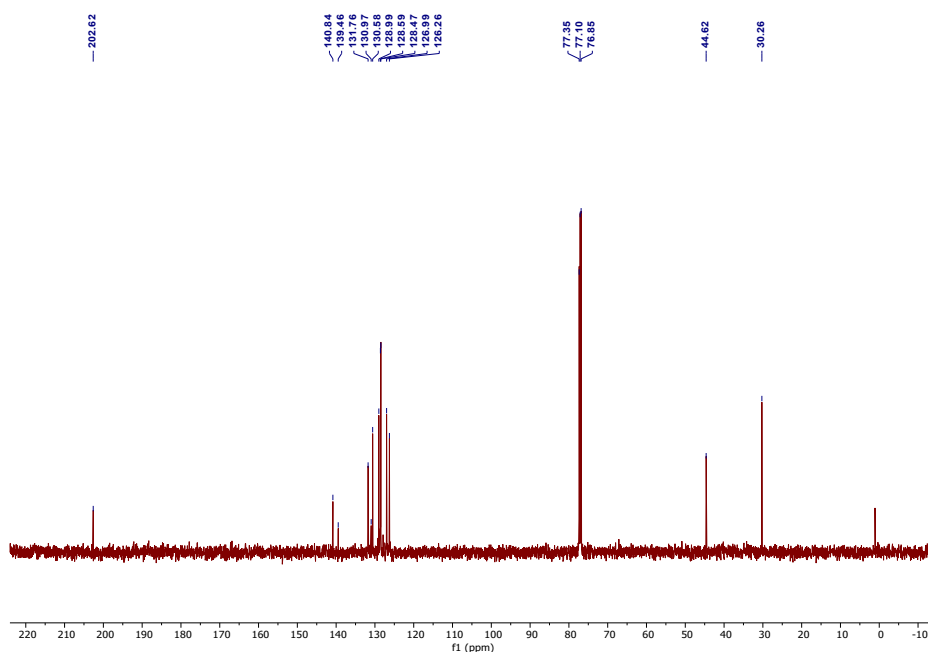

Figure S29.  $^{13}\text{C}\{^1\text{H}\}$  NMR Spectrum (100 MHz,  $\text{CDCl}_3$ ) of P11.

### Synthesis of P12:

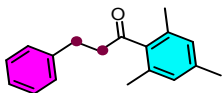

**1-mesityl-3-phenylpropan-1-one (P12).** 54.3 mg; 82% isolated yield; yellow solid:  $^1\text{H NMR}$  (400 MHz,  $\text{CDCl}_3$ ):  $\delta$  = 7.31 – 7.20 (m, 5H), 6.82 (s, 2H), 3.07 – 3.00 (m, 4H), 2.27 (s, 3H), 2.13 (s, 6H).  $^{13}\text{C NMR}$  (100 MHz,  $\text{CDCl}_3$ ):  $\delta$  = 209.8, 141.1, 139.6, 138.5, 132.7, 128.6, 126.3, 46.5, 29.6, 21.1, 19.1.

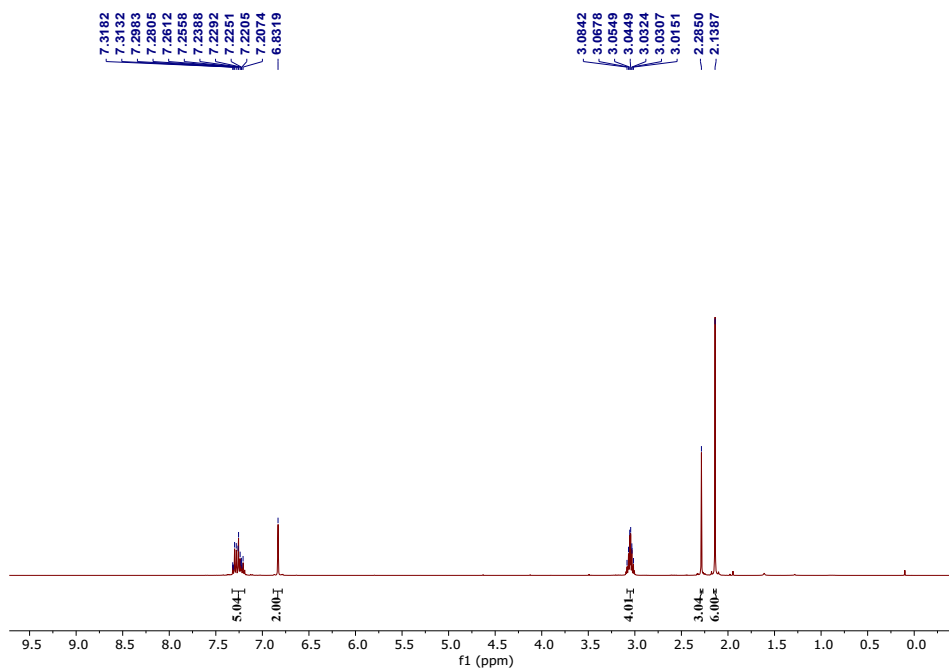

Figure S30.  $^1\text{H NMR}$  Spectrum (400 MHz,  $\text{CDCl}_3$ ) of P12

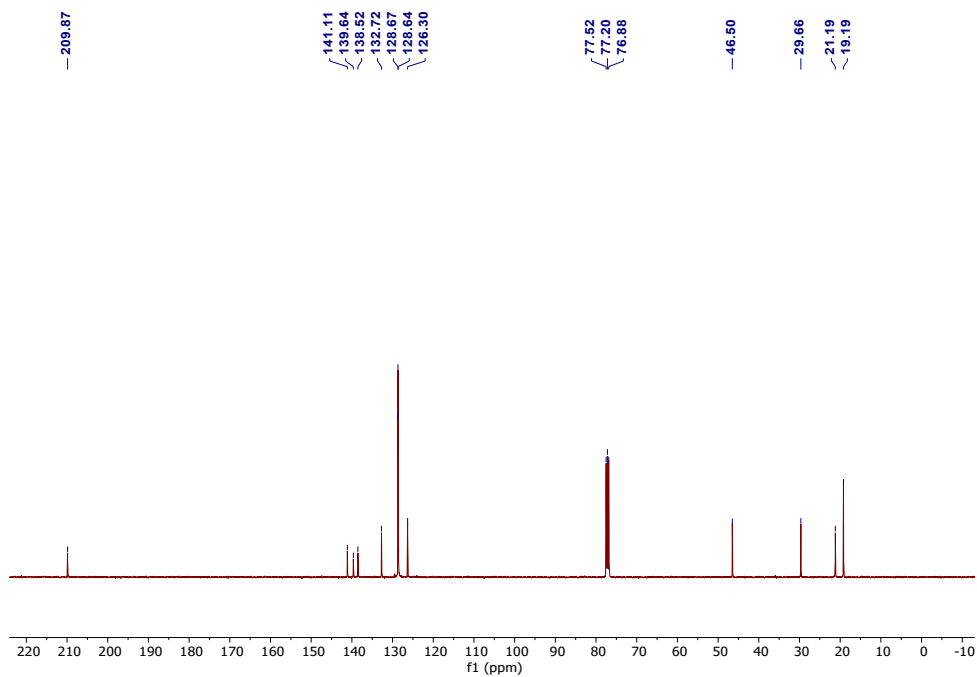

Figure S31.  $^{13}\text{C}\{^1\text{H}\}$  NMR Spectrum (100 MHz,  $\text{CDCl}_3$ ) of P12.

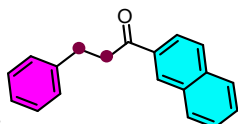

### Synthesis of P13:

**1-(naphthalen-2-yl)-3-phenylpropan-1-one (P13).** 62.7 mg; 78% isolated yield; brown solid:  $^1\text{H NMR}$  (400 MHz,  $\text{CDCl}_3$ ):  $\delta$  = 8.46 (s, 1H), 8.04 (d, 1H), 7.94 – 7.86 (m, 3H), 7.61 -7.52 (m, 2H), 7.34 – 7.18 (m, 5H), 3.44 (t, 2H), 3.13 (t, 2H).  $^{13}\text{C NMR}$  (100 MHz,  $\text{CDCl}_3$ )  $\delta$  = 199.3, 141.5, 135.7, 134.3, 132.7, 129.8, 129.7, 129.2, 128.7, 128.6, 128.5, 127.9, 126.9, 126.3, 124.0, 40.7, 30.4.

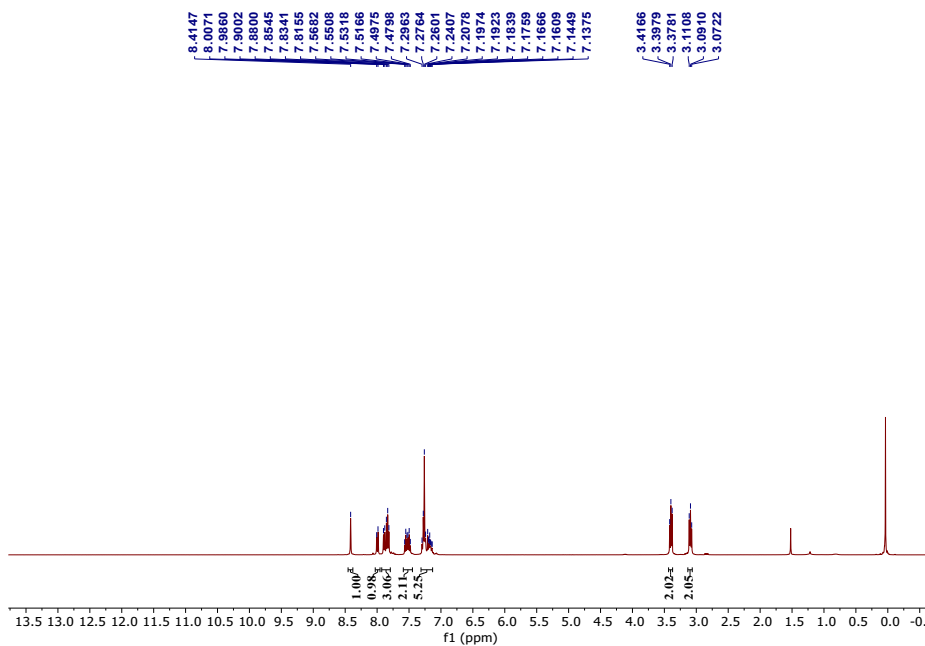

Figure S32.  $^1\text{H NMR}$  Spectrum (400 MHz,  $\text{CDCl}_3$ ) of P13

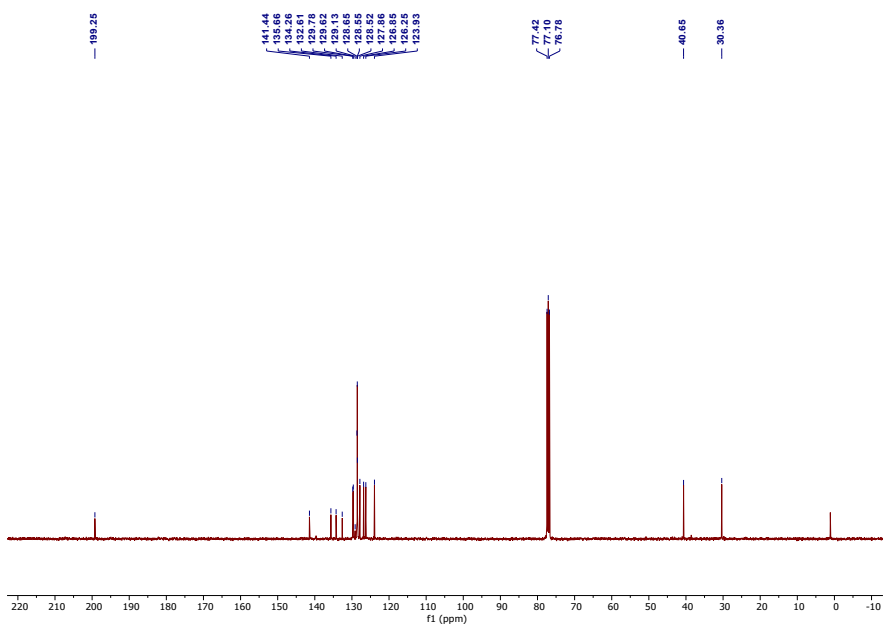

Figure S33.  $^{13}\text{C NMR}$  Spectrum (100 MHz,  $\text{CDCl}_3$ ) of P13.

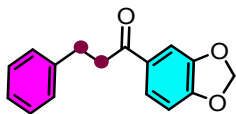

### Synthesis of P14:

**1-(benzo[d][1,3]dioxol-5-yl)-3-phenylpropan-1-one (P14)**. 44.8 mg; 76% isolated yield; white solid:  $^1\text{H NMR}$  (500 MHz,  $\text{CDCl}_3$ ):  $\delta = 7.56 - 7.54$  (m, 1H), 7.44 (s, 1H), 7.31 - 7.20 (m, 5H), 6.83 (d, 1H), 6.03 (s, 2H), 3.22 (t, 2H), 3.05 (d, 2H).  $^{13}\text{C NMR}$  (125 MHz,  $\text{CDCl}_3$ ):  $\delta = 197.4, 151.8, 148.3, 141.5, 131.9, 128.6, 128.5, 126.2, 124.3, 108.0, 107.9, 101.9, 40.3, 30.5$ .

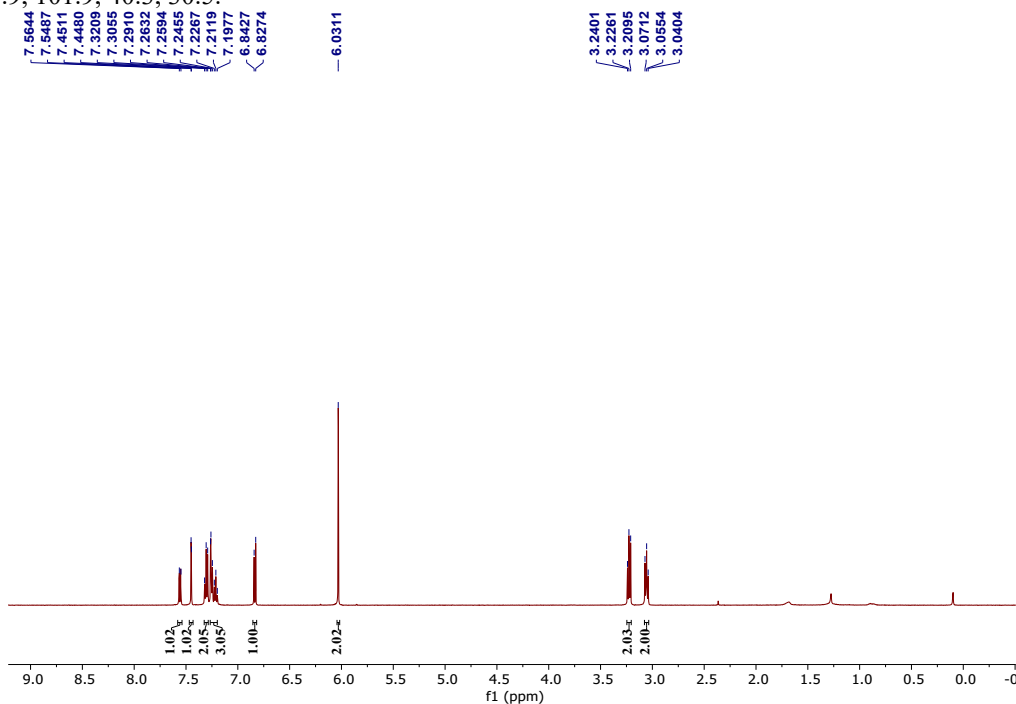

Figure S34.  $^1\text{H NMR}$  Spectrum (400 MHz,  $\text{CDCl}_3$ ) of P14

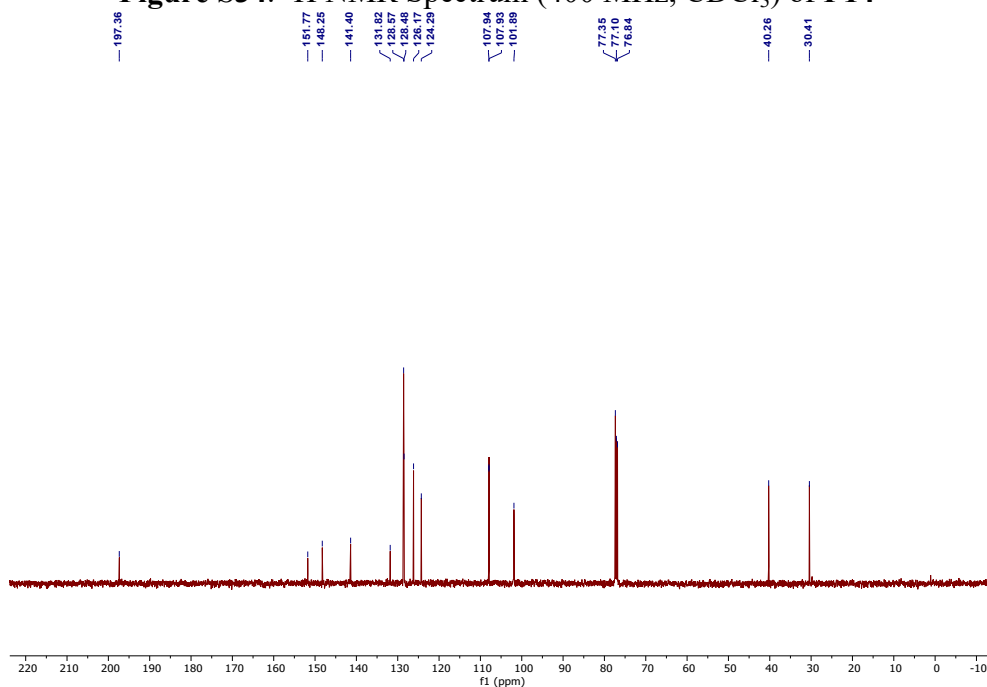

Figure S35.  $^{13}\text{C}\{^1\text{H}\}$  NMR Spectrum (100 MHz,  $\text{CDCl}_3$ ) of P14.

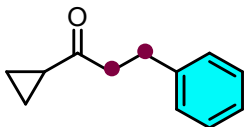

### Synthesis of P15:

**1-cyclopropyl-3-phenylpropan-1-one (P15).** 38.0 mg; 72% isolated yield; pale yellow oil:  $^1\text{H}$  NMR (400 MHz,  $\text{CDCl}_3$ ):  $\delta = 7.29 - 7.24$  (m, 2H),  $7.19 - 7.16$  (m, 3H),  $2.94 - 2.85$  (m, 4H),  $1.93 - 1.86$  (m, 1H),  $1.03 - 0.98$  (m, 2H),  $0.87 - 0.82$  (m, 2H).  $^{13}\text{C}\{^1\text{H}\}$  NMR (125 MHz,  $\text{CDCl}_3$ ):  $\delta = 210.1, 141.4, 128.6, 128.5, 126.2, 45.1, 30.1, 20.7, 10.8$ .

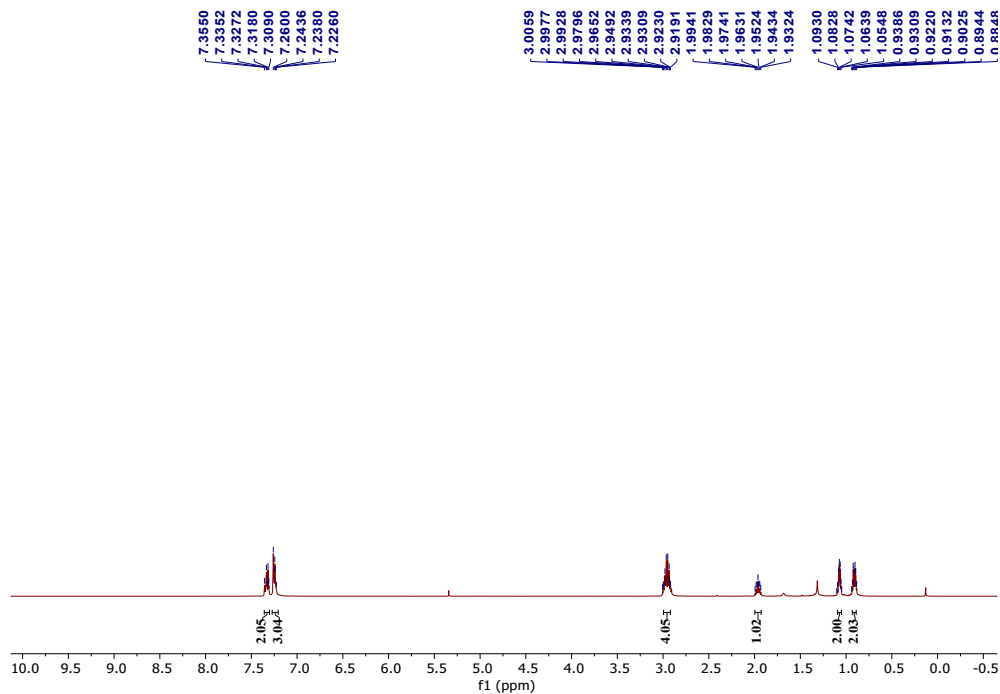

Figure S36  $^1\text{H}$  NMR Spectrum (400 MHz,  $\text{CDCl}_3$ ) of P15.

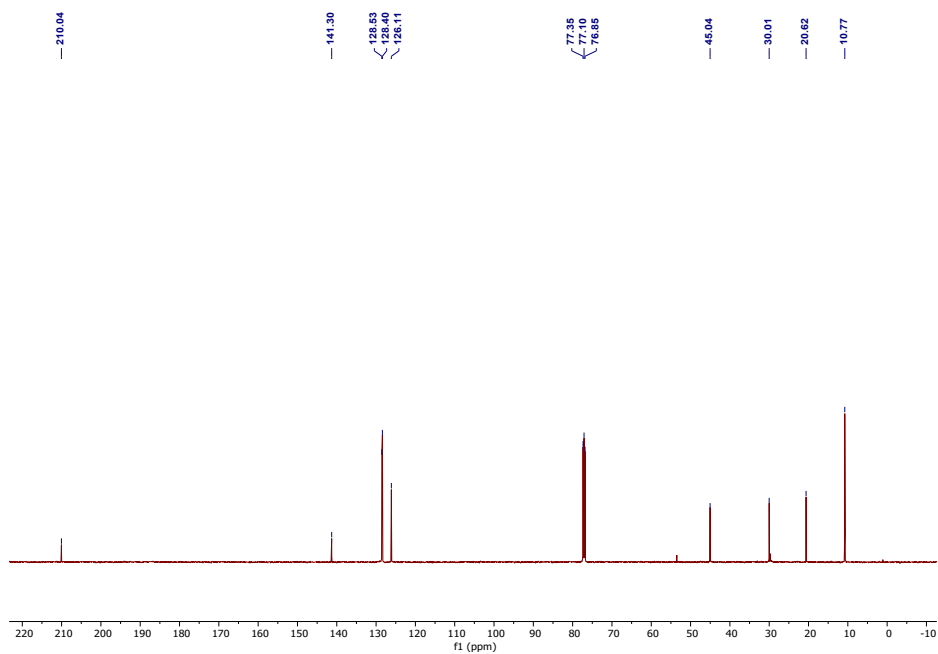

Figure S37.  $^{13}\text{C}\{^1\text{H}\}$  NMR Spectrum (125 MHz,  $\text{CDCl}_3$ ) of P15.

### Synthesis of P16

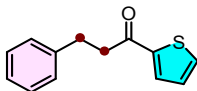

**3-phenyl-1-(thiophen-2-yl)propan-1-one (16)** 42 mg, 73% isolated yield; white solid.  $^1\text{H}$  NMR (400 MHz,  $\text{CDCl}_3$ ):  $\delta$  = 7.96 (d,  $J_{\text{H,H}} = 7.7$  Hz, 2H), 7.55 (t,  $J_{\text{H,H}} = 7.6$  Hz, 1H), 7.45 (t,  $J_{\text{H,H}} = 7.6$  Hz, 2H), 7.11 (d,  $J_{\text{H,H}} = 5.1$  Hz, 1H), 6.91 (t,  $J_{\text{H,H}} = 4.3$  Hz, 1H), 6.86 (d,  $J_{\text{H,H}} = 3.4$  Hz, 1H), 3.34 (t,  $J_{\text{H,H}} = 6.9$  Hz, 2H), 3.29 (t,  $J_{\text{H,H}} = 8.1$  Hz, 2H).  $^{13}\text{C}\{^1\text{H}\}$  NMR (125 MHz,  $\text{CDCl}_3$ ):  $\delta$  = 198.6, 143.9, 136.8, 133.2, 128.7, 128.1, 128.1, 126.9, 124.7, 123.4, 40.6, 24.2.

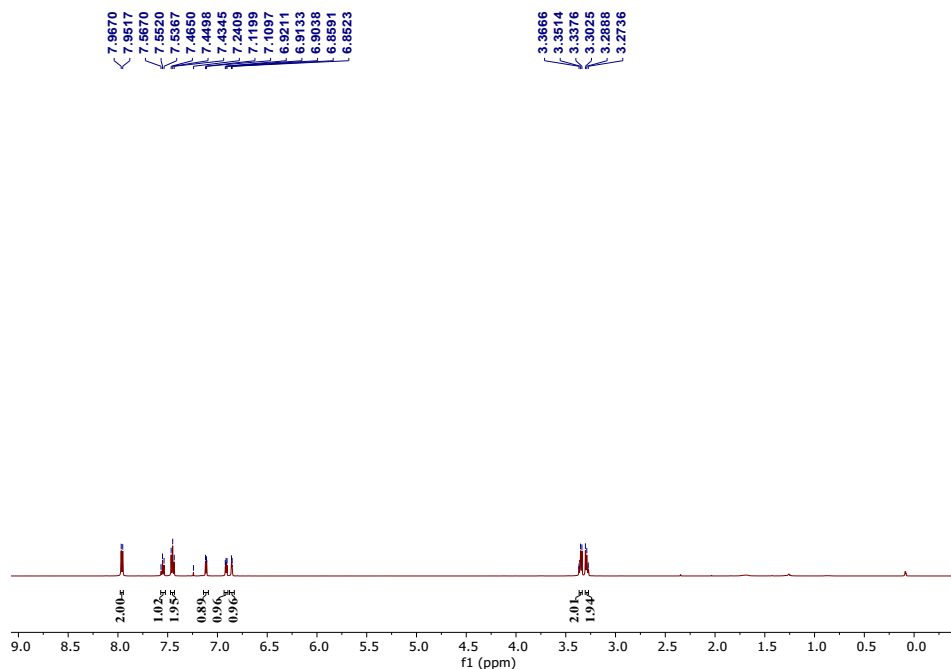

Figure S38  $^1\text{H}$  NMR Spectrum (400 MHz,  $\text{CDCl}_3$ ) of P16.

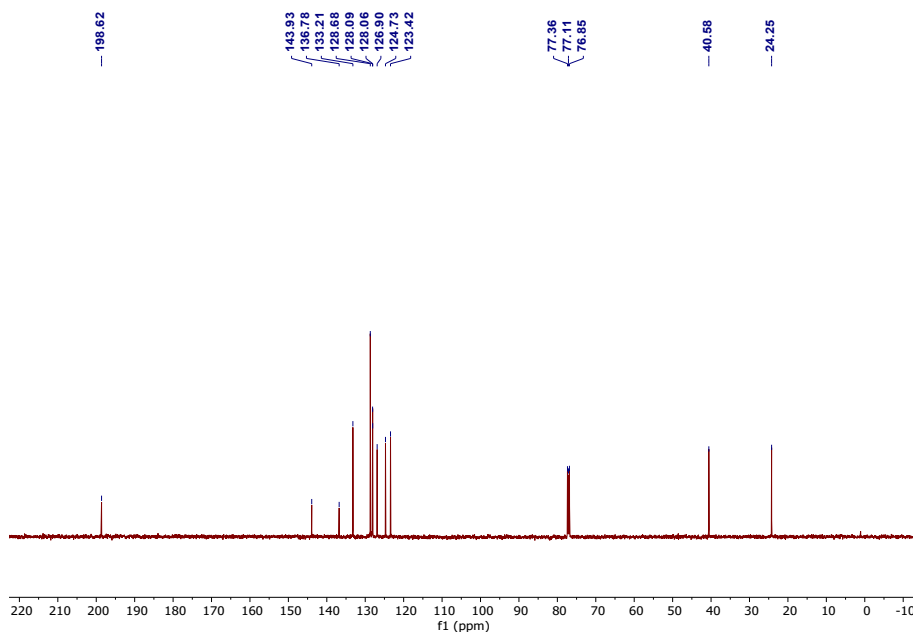

Figure S39  $^{13}\text{C}\{^1\text{H}\}$  NMR Spectrum (125 MHz,  $\text{CDCl}_3$ ) of P16.

## Synthesis of P17

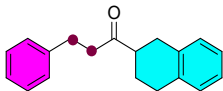

**3-phenyl-1-(1,2,3,4-tetrahydronaphthalen-2-yl)propan-1-one (P16)** 108.4 mg, 78% isolated yield; white solid.  $^1\text{H}$  NMR (400 MHz,  $\text{CDCl}_3$ ):  $\delta$  = 8.08 (d,  $J_{\text{H,H}}$  = 7.9 Hz, 1H), 7.47 – 7.43 (m, 1H), 7.31 (t,  $J_{\text{H,H}}$  = 7.5 Hz, 3H), 7.25 – 7.20 (m, 4H), 3.50 (dd,  $J_{\text{H,H}}$  = 13.7, 3.9 Hz, 1H), 2.92 (dt,  $J_{\text{H,H}}$  = 8.9, 4.4 Hz, 2H), 2.77 – 2.70 (m, 1H), 2.65 (dd,  $J_{\text{H,H}}$  = 13.6, 9.5 Hz, 1H), 2.13 – 2.08 (m, 1H), 1.81 – 1.73 (m, 1H).  $^{13}\text{C}\{^1\text{H}\}$  NMR (100 MHz,  $\text{CDCl}_3$ ):  $\delta$  = 199.4, 144.0, 140.1, 133.3, 132.5, 129.3, 128.7, 128.4, 127.5, 126.6, 126.1, 49.4, 35.7, 28.6, 27.7.

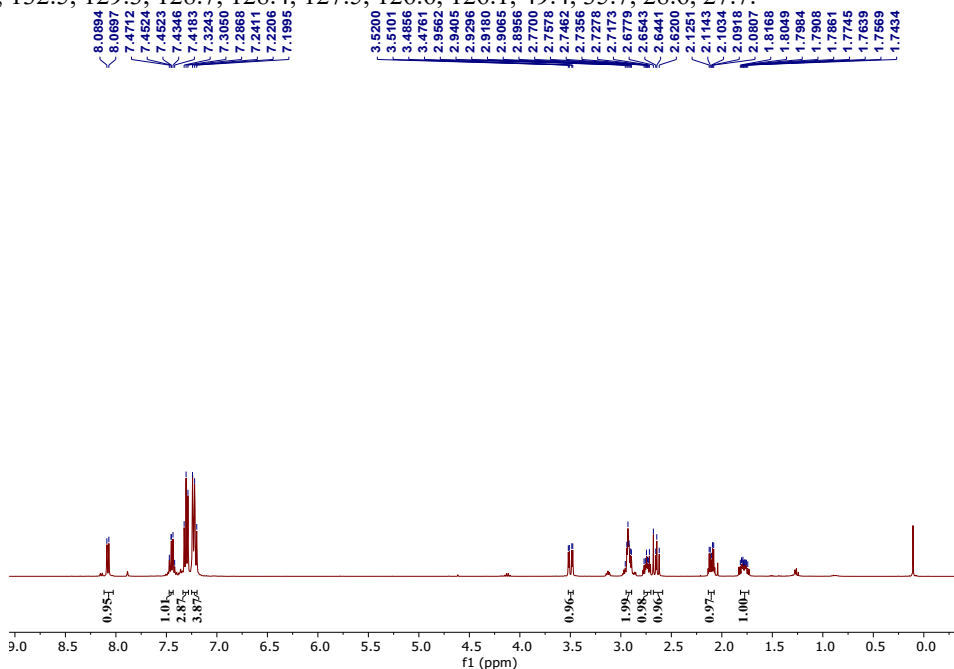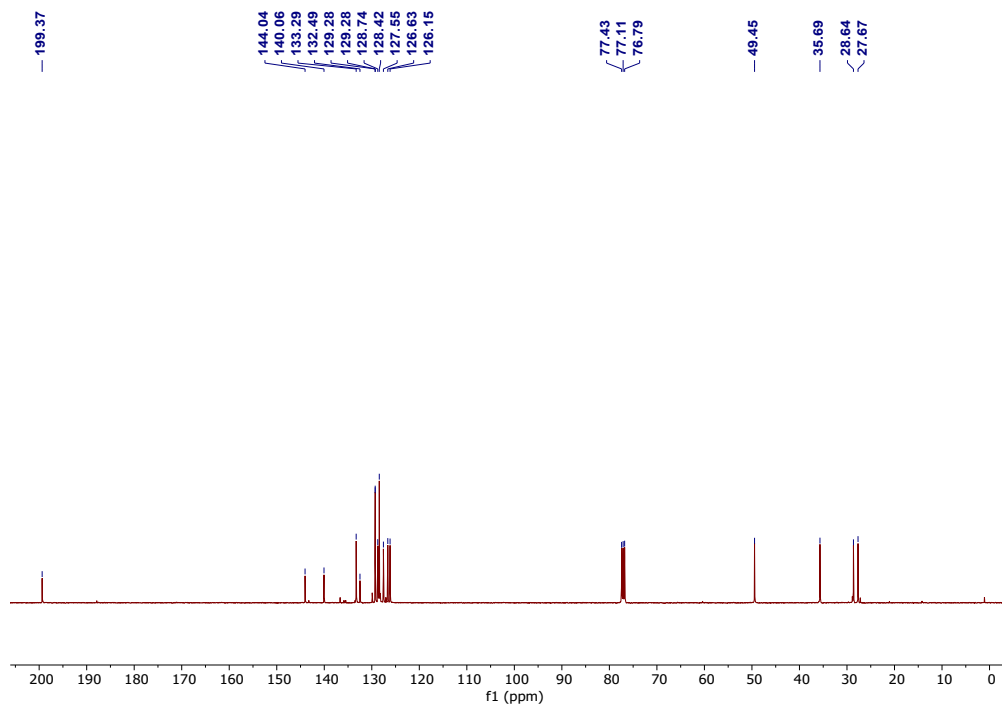

### Synthesis of P18:

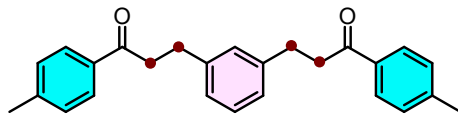

148.2 mg, 80% isolated yield; white solid.  $^1\text{H NMR}$  (500 MHz,  $\text{CDCl}_3$ ):  $\delta = 7.88$  (d,  $J_{\text{H,H}} = 7.9$  Hz, 4H), 7.29 – 7.26 (m, 5H), 7.16 – 7.11 (m, 3H), 3.28 (t,  $J_{\text{H,H}} = 7.8$  Hz, 4H), 3.06 (t,  $J_{\text{H,H}} = 7.9$  Hz, 4H), 2.43 (s, 6H).  $^{13}\text{C}\{^1\text{H}\}$  NMR (125 MHz,  $\text{CDCl}_3$ ):  $\delta = 199.0, 143.9, 141.7, 134.5, 129.3, 128.8, 128.7, 128.3, 126.3, 40.4, 30.3, 21.7$ . ESI-MS: Calcd for  $\text{C}_{26}\text{H}_{27}\text{O}_2^+$ ,  $[\text{M}+\text{H}]^+$ , 371.2011; found, 371.2046.

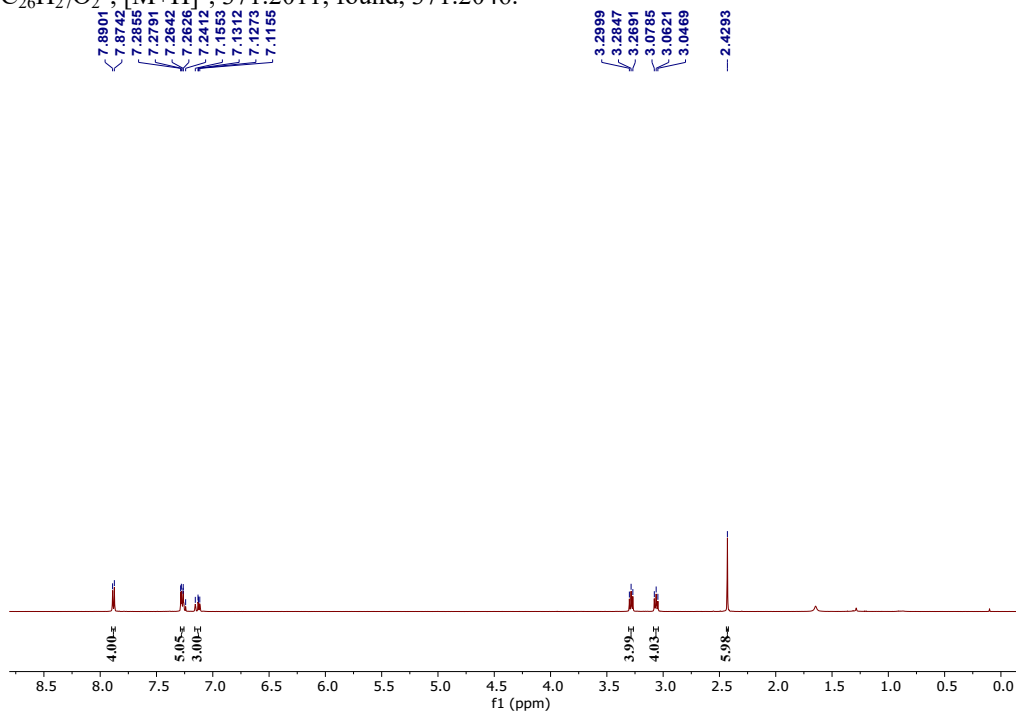

Figure S42  $^1\text{H NMR}$  Spectrum (400 MHz,  $\text{CDCl}_3$ ) of P18.

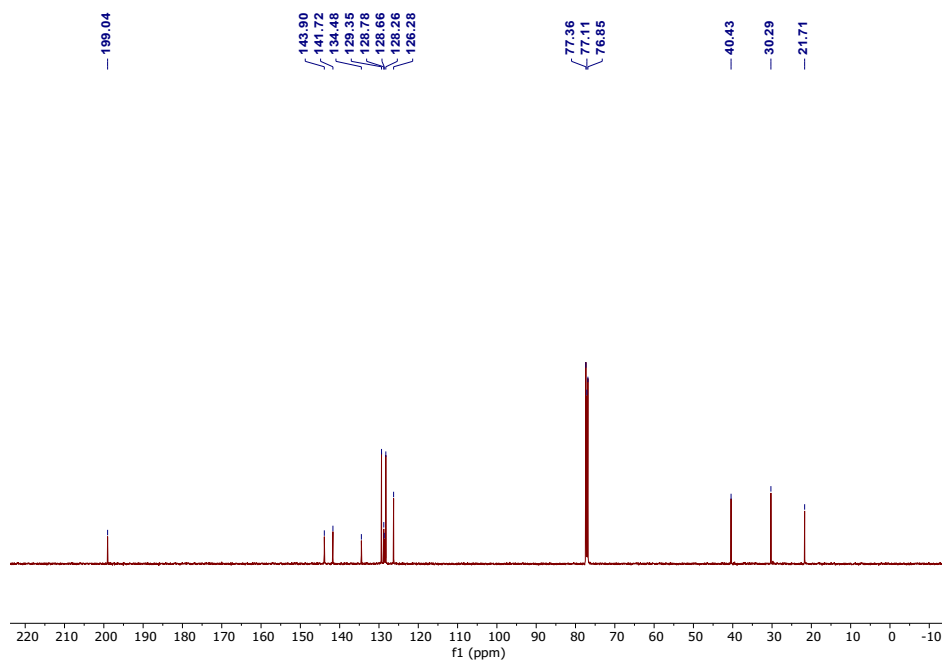

Figure S43  $^{13}\text{C}\{^1\text{H}\}$  NMR Spectrum (125 MHz,  $\text{CDCl}_3$ ) of P18.

### Synthesis of P19:

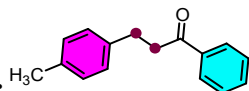

**1-phenyl-3-(p-tolyl)propan-1-one (P19).** 54.9 mg; 82% isolated yield; yellow oil:  $^1\text{H NMR}$  (500 MHz,  $\text{CDCl}_3$ ):  $\delta$  = 7.96 – 7.94 (m, 2H), 7.55 (t,  $J_{\text{H-H}} = 7.3$  Hz, 1H), 7.44 (t,  $J_{\text{H-H}} = 7.7$  Hz, 2H), 7.15 – 7.10 (m, 4H), 3.28 (t,  $J_{\text{H-H}} = 7.3$  Hz, 2H), 3.02 (t,  $J_{\text{H-H}} = 8.1$  Hz, 2H), 2.32 (s, 3H).  $^{13}\text{C NMR}$  (125 MHz,  $\text{CDCl}_3$ ):  $\delta$  = 199.5, 138.3, 137.0, 135.8, 133.2, 129.3, 128.7, 128.4, 128.2, 40.8, 29.9, 21.1.

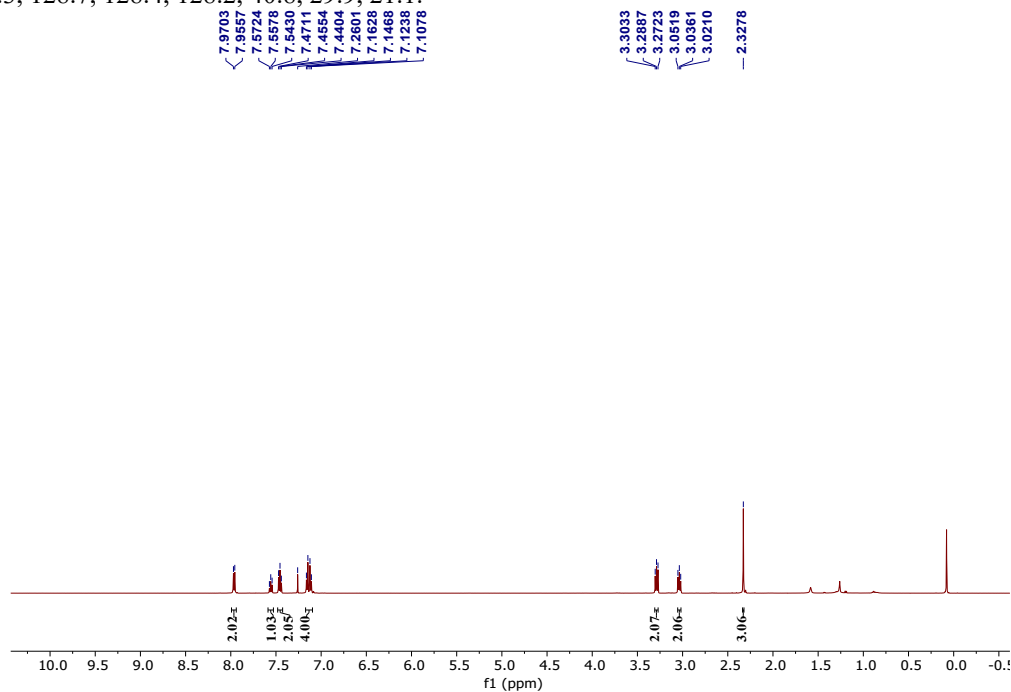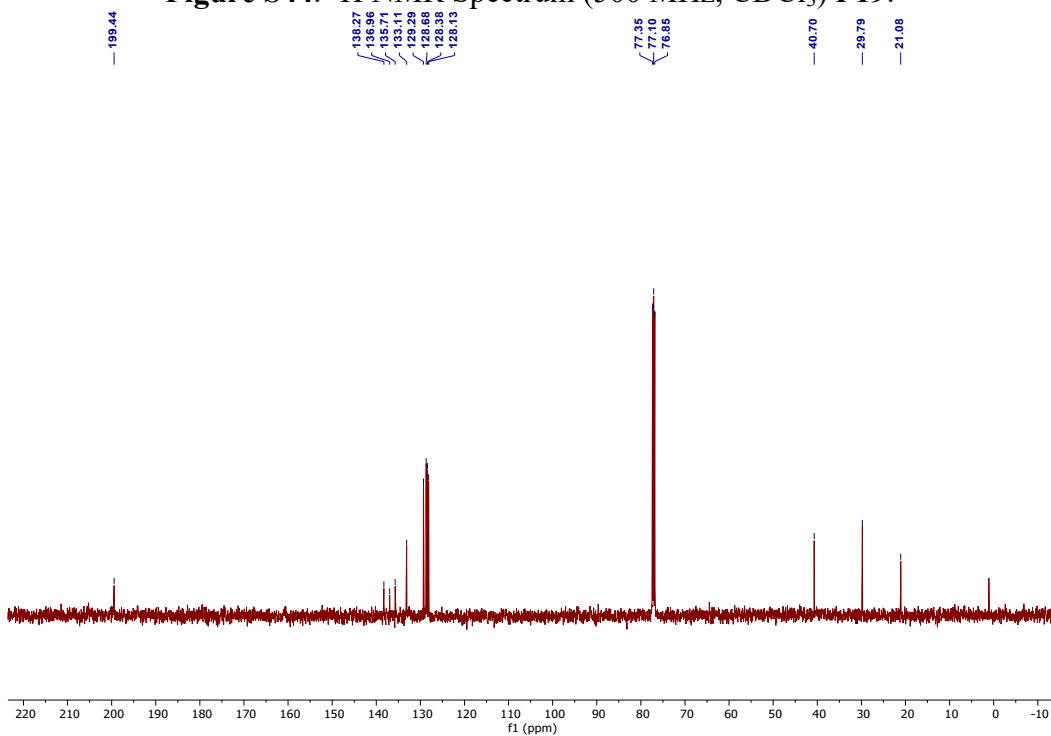

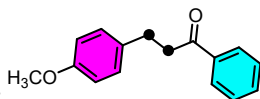

**Synthesis of P20:**

**3-(4-methoxyphenyl)-1-phenylpropan-1-one (P20)**, 44.0 mg; 80% isolated yield; yellow solid:  $^1\text{H}$  NMR (400 MHz,  $\text{CDCl}_3$ ):  $\delta$  = 7.94 (d, 2H), 7.56 (t, 1H), 7.44 (t, 2H), 7.17 (d, 2H), 6.84 (d, 2H), 3.78 (s, 3H), 3.27 (t, 2H), 3.02 (t, 2H).  $^{13}\text{C}$  NMR (100 MHz,  $\text{CDCl}_3$ ):  $\delta$  = 199.5, 158.1, 137.0, 133.4, 133.1, 129.4, 128.7, 128.1, 114.0, 55.3, 40.8, 29.4.

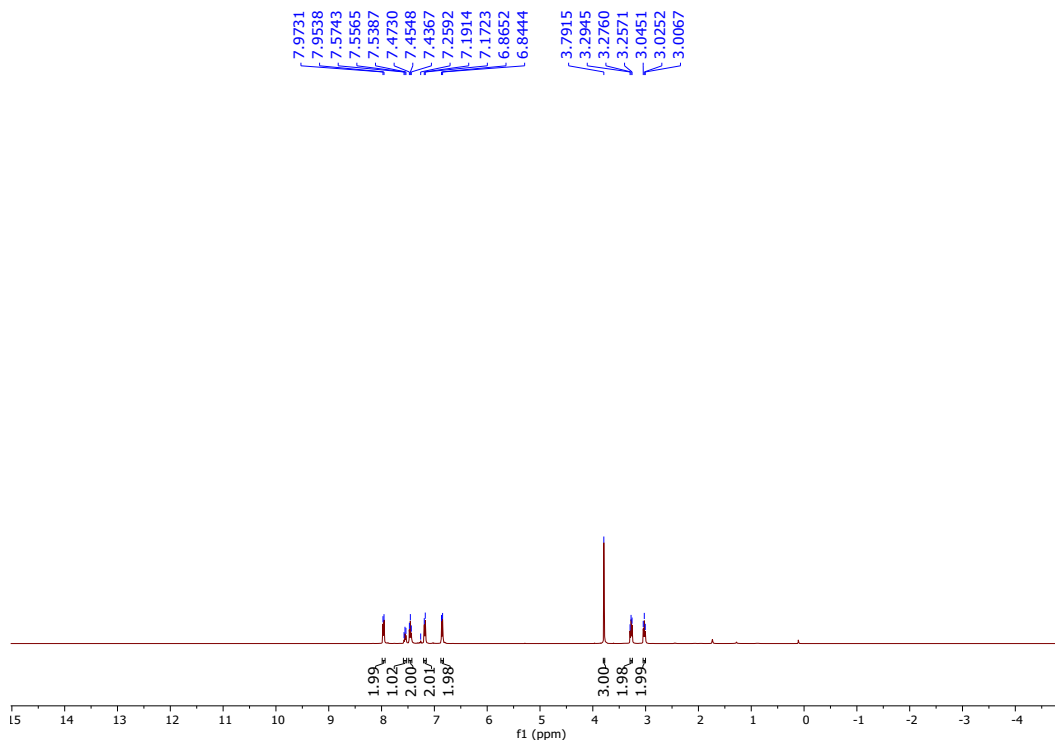

**Figure S46.**  $^1\text{H}$  NMR Spectrum (400 MHz,  $\text{CDCl}_3$ ) of P20.

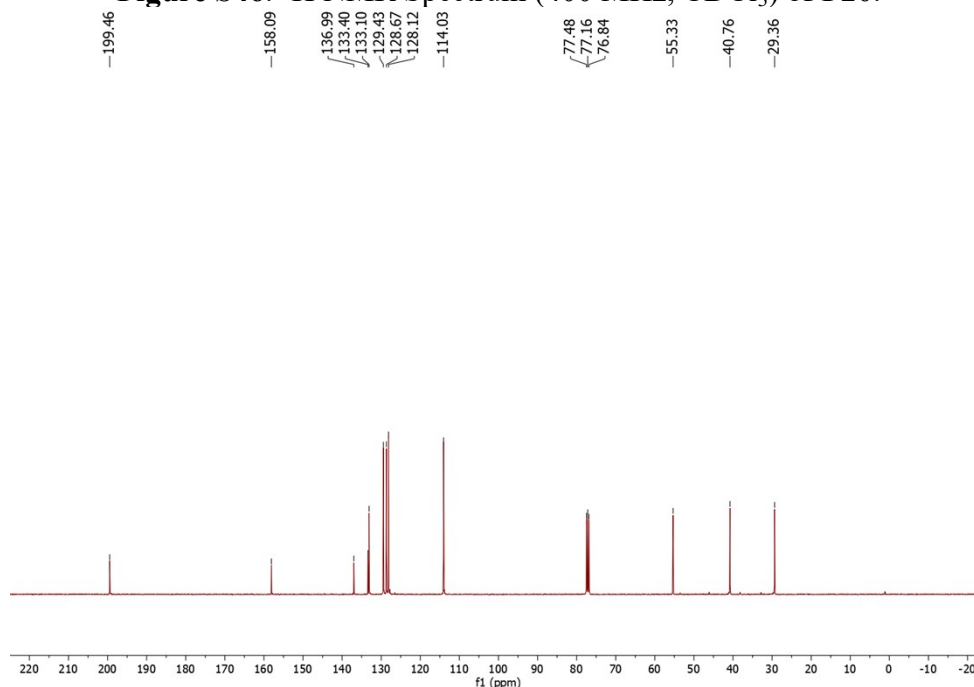

**Figure S47.**  $^{13}\text{C}\{^1\text{H}\}$  NMR Spectrum (100 MHz,  $\text{CDCl}_3$ ) of P20.

**Synthesis of P21:**

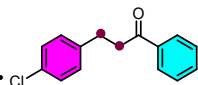

**3-(4-chlorophenyl)-1-phenylpropan-1-one (P21).** 60.2 mg; 78% isolated yield; yellow solid:  $^1\text{H}$  NMR (500 MHz,  $\text{CDCl}_3$ )  $\delta$  = 7.94 (d, 2H), 7.55 (t, 1H), 7.45 (t, 2H), 7.21 – 7.18 (m, 2H), 6.97 (t, 2H), 3.27 (t, 2H), 3.04 (t, 2H).  $^{13}\text{C}$  NMR (125 MHz,  $\text{CDCl}_3$ )  $\delta$  = 199.2, 137.0, 136.9, 133.3, 130.0, 129.9, 128.8, 128.1, 115.3, 40.5, 29.3.

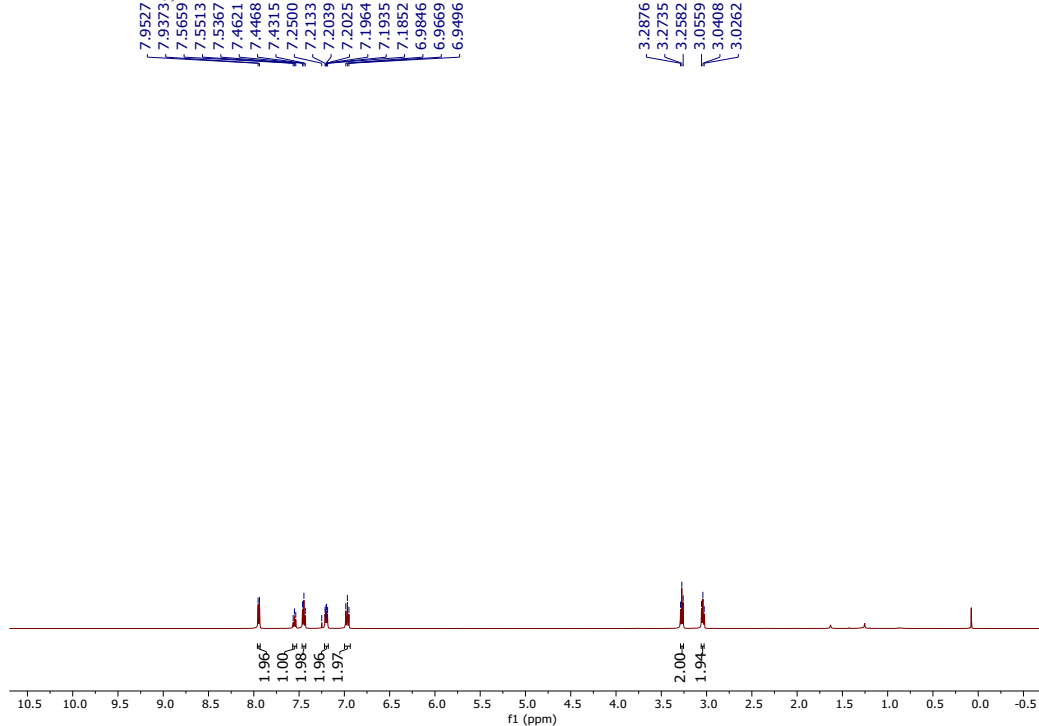

Figure S48.  $^1\text{H}$  NMR Spectrum (500 MHz,  $\text{CDCl}_3$ ) of P21.

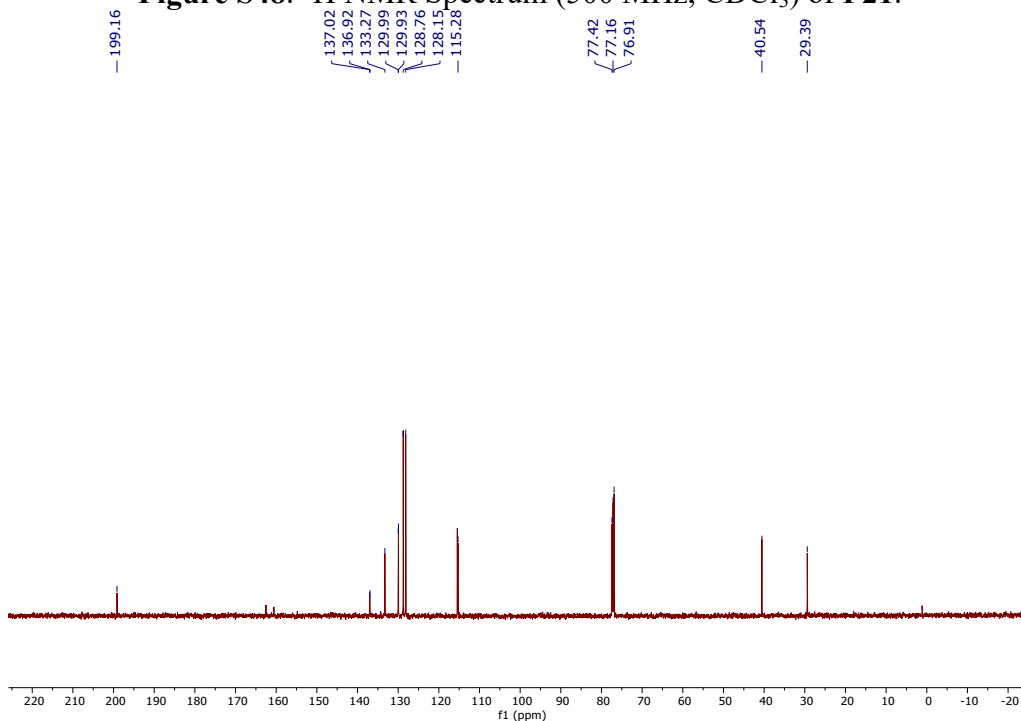

Figure S49.  $^{13}\text{C}\{^1\text{H}\}$  NMR Spectrum (125 MHz,  $\text{CDCl}_3$ ) of P21.

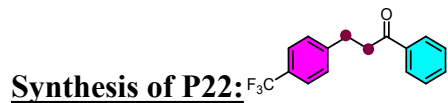

**1-phenyl-3-(4-(trifluoromethyl)phenyl)propan-1-one (P22).** 66.4 mg; 72% isolated yield; white solid:  $^1\text{H}$  NMR (500 MHz,  $\text{CDCl}_3$ ):  $\delta = 7.95$  (d, 2H), 7.57 – 7.53 (m, 3H), 7.45 (t, 2H), 7.36 (d, 2H), 3.32 (t, 2H), 3.13 (t, 2H).  $^{13}\text{C}$  NMR (125 MHz,  $\text{CDCl}_3$ ):  $\delta = 198.7, 145.6, 136.8, 133.4, 128.9, 128.8, 128.1, 125.6, 123.3, 39.9, 29.9$ .

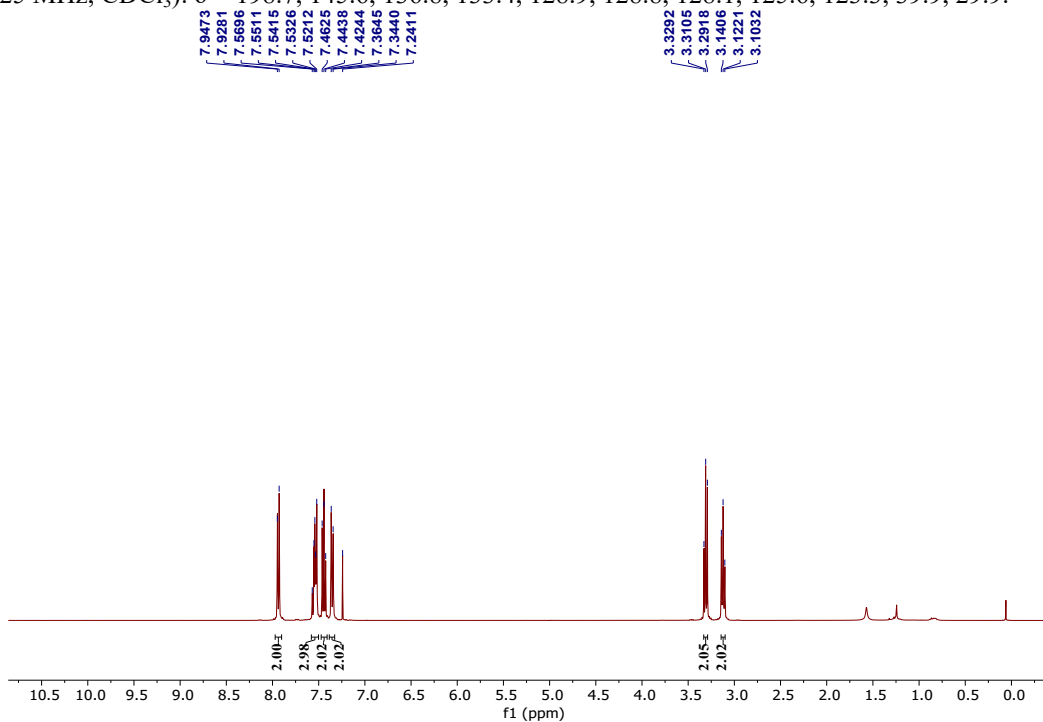

**Figure S50.**  $^1\text{H}$  NMR Spectrum (500 MHz,  $\text{CDCl}_3$ ) of P22.

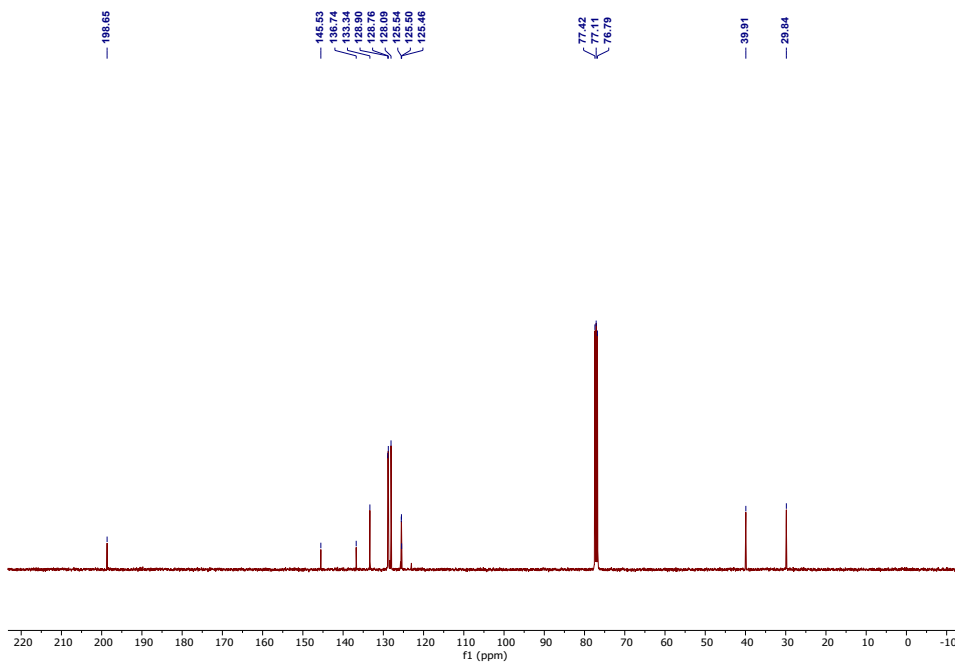

**Figure S51.**  $^{13}\text{C}\{^1\text{H}\}$  NMR Spectrum (125 MHz,  $\text{CDCl}_3$ ) of P22.

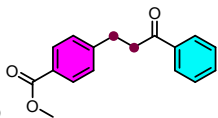

### Synthesis of P23

**methyl 4-(3-phenylpropanoyl)benzoate (P23)**. 60.6 mg; 78% isolated yield; white solid:  $^1\text{H}$  NMR (400 MHz,  $\text{CDCl}_3$ ):  $\delta = 7.97 - 7.93$  (m, 4H), 7.57 - 7.53 (m, 1H), 7.44 (t, 2H), 7.31 (d 2H), 3.89 (s, 3H), 3.31 (t, 2H), 3.11 (t, 2H).  $^{13}\text{C}\{^1\text{H}\}$  NMR (100 MHz,  $\text{CDCl}_3$ ):  $\delta = 198.8, 167.2, 146.9, 136.8, 133.3, 130.0, 128.8, 128.6, 128.3, 128.1, 52.1, 39.9, 30.1$ .

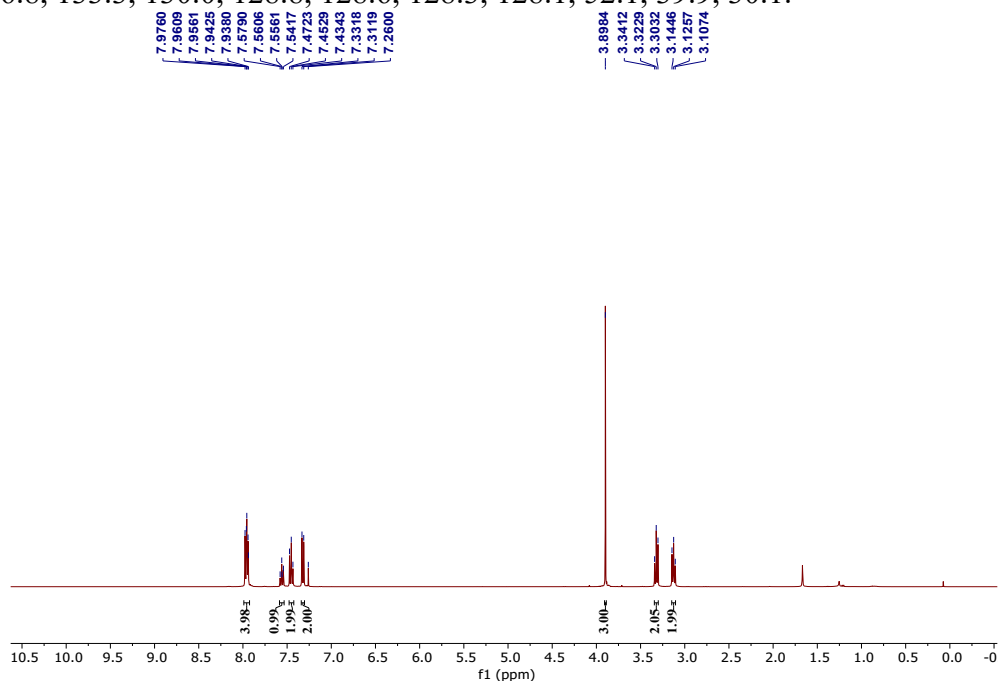

Figure S52.  $^1\text{H}$  NMR Spectrum (400 MHz,  $\text{CDCl}_3$ ) of P23.

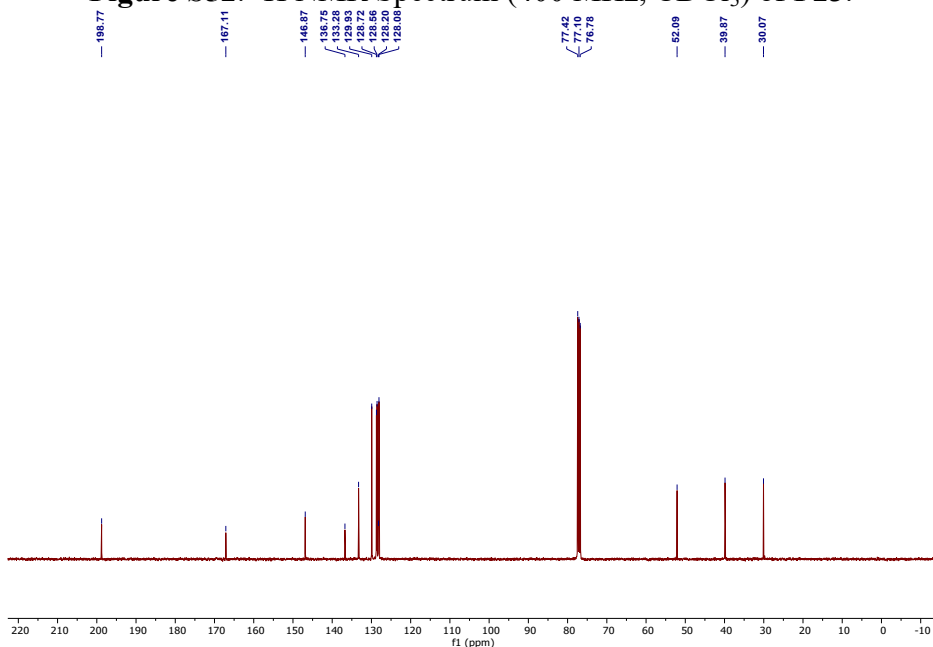

Figure S53.  $^{13}\text{C}\{^1\text{H}\}$  NMR Spectrum (100 MHz,  $\text{CDCl}_3$ ) of P23.

**Synthesis of P24:**

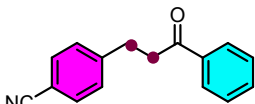

**4-(3-phenylpropanoyl)benzonitrile (P24).** 50.2 mg; 70% isolated yield; white solid:  $^1\text{H}$  NMR (400 MHz,  $\text{CDCl}_3$ ):  $\delta$  = 8.01 (d,  $J_{\text{H-H}}$  = 8.5 Hz, 2H), 7.74 (d,  $J_{\text{H-H}}$  = 8.6 Hz, 2H), 7.31 – 7.21 (m, 5H), 3.30 (t,  $J_{\text{H-H}}$  = 7.1 Hz, 2H), 3.07 (t,  $J_{\text{H-H}}$  = 7.8 Hz, 2H).  $^{13}\text{C}\{^1\text{H}\}$  NMR (100 MHz,  $\text{CDCl}_3$ ):  $\delta$  = 198.0, 140.8, 139.9, 132.7, 128.8, 128.6, 128.5, 126.5, 118.0, 116.5, 40.9, 30.0.

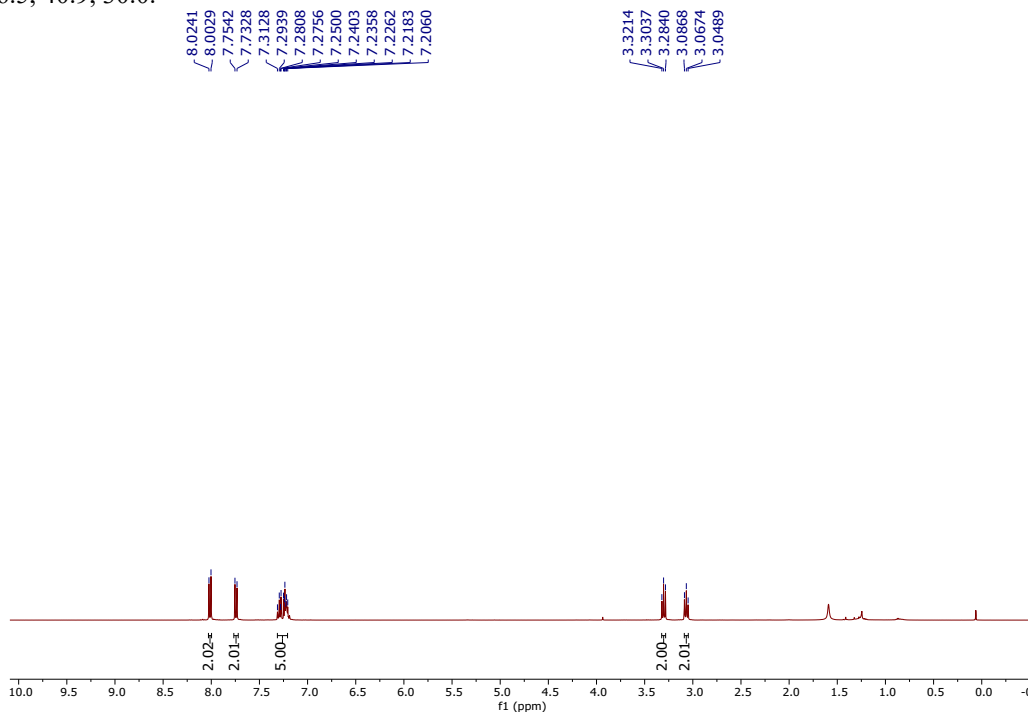

**Figure S54.**  $^1\text{H}$  NMR Spectrum (400 MHz,  $\text{CDCl}_3$ ) of P24.

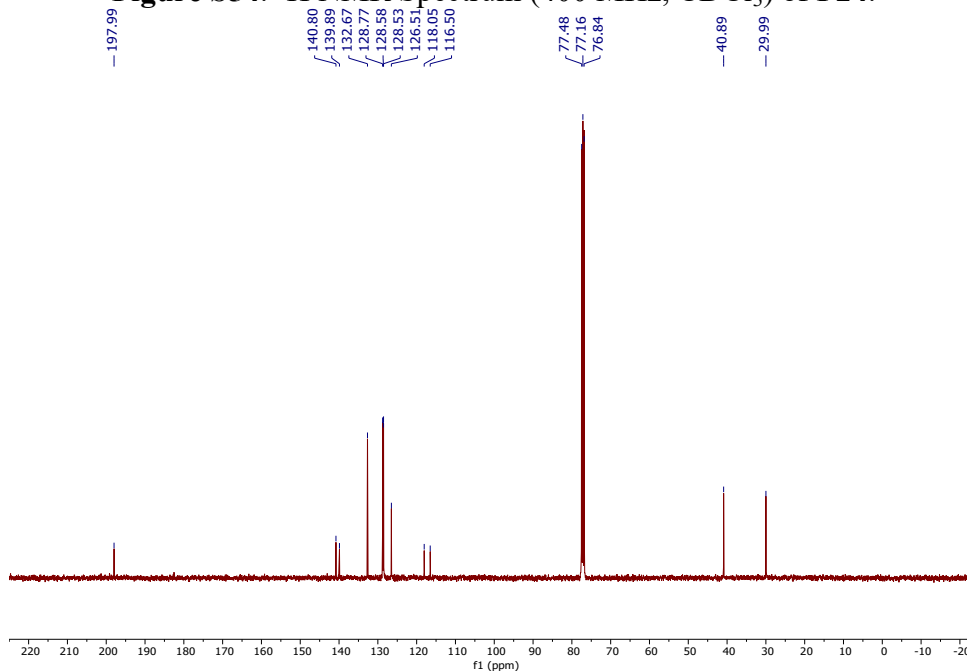

**Figure S55.**  $^{13}\text{C}\{^1\text{H}\}$  NMR Spectrum (100 MHz,  $\text{CDCl}_3$ ) of P24.

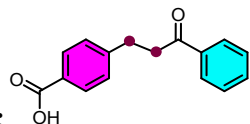

**Synthesis P25:**

**4-(3-oxo-3-phenylpropyl)benzoic acid (P25).** 50.1 mg; 71% isolated yield; yellow solid:  $^1\text{H}$  NMR (500 MHz,  $\text{DMSO-D}_6$ ):  $\delta$  = 7.98 (d, 2H), 7.87 (s, 2H), 7.62 (t, 1H), 7.51 (t, 2H), 7.41 (d, 2H), 3.41 (t, 2H), 3.01 (t, 2H).  $^{13}\text{C}\{^1\text{H}\}$  NMR (125 MHz,  $\text{DMSO-d}_6$ ):  $\delta$  = 198.9, 146.7, 136.6, 133.2, 128.7, 128.0, 29.42.

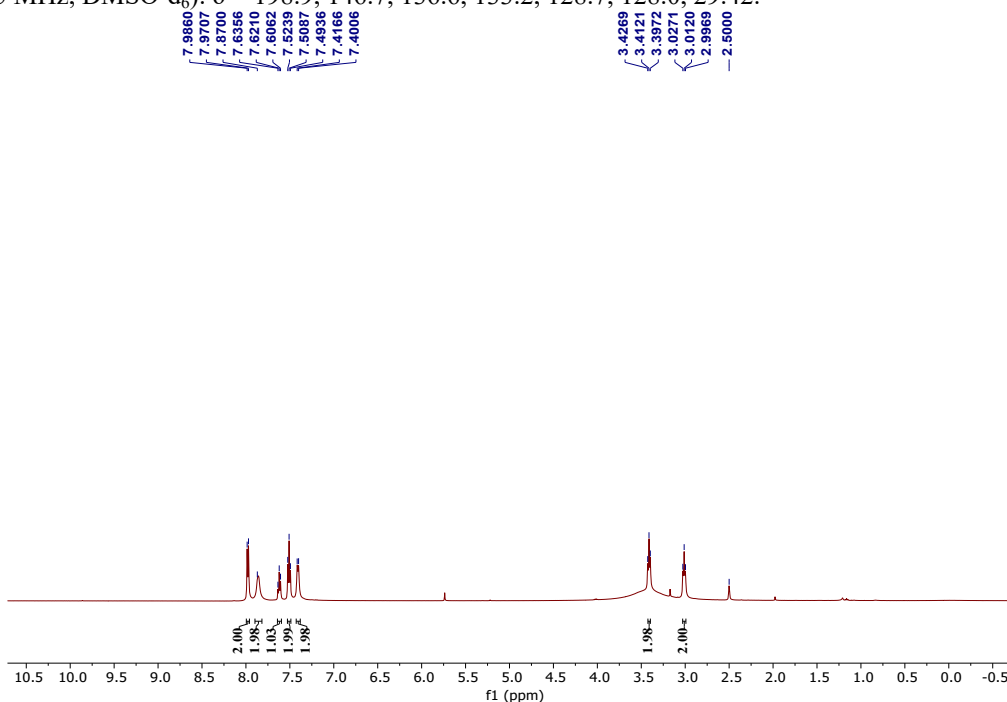

**Figure S56.**  $^1\text{H}$  NMR Spectrum (500 MHz,  $\text{DMSO-D}_6$ ) of **P25**.

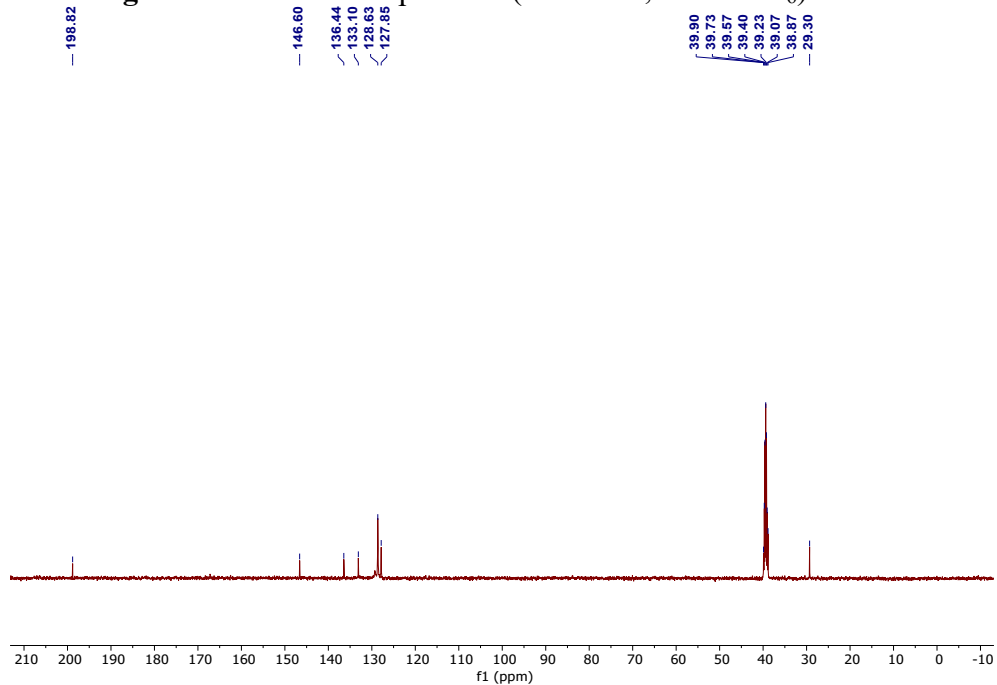

**Figure S57.**  $^{13}\text{C}\{^1\text{H}\}$  NMR Spectrum (125 MHz,  $\text{DMSO-D}_6$ ) of **P25**.

**Synthesis P26:**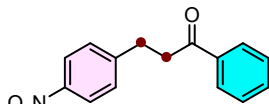

**3-(4-nitrophenyl)-1-phenylpropan-1-one (26)** 108.4 mg, 62% isolated yield; white solid.  $^1\text{H NMR}$  (500 MHz,  $\text{CDCl}_3$ ):  $\delta$  = 8.13 (d,  $J_{\text{H,H}} = 8.2$  Hz, 2H), 7.93 (d,  $J_{\text{H,H}} = 7.9$  Hz, 2H), 7.55 (d,  $J_{\text{H,H}} = 7.2$  Hz, 1H), 7.44 (t,  $J_{\text{H,H}} = 7.6$  Hz, 2H), 7.40 (d,  $J_{\text{H,H}} = 8.4$  Hz, 2H), 3.34 (t,  $J_{\text{H,H}} = 7.5$  Hz, 2H), 3.17 (t,  $J_{\text{H,H}} = 7.3$  Hz, 2H).  $^{13}\text{C}\{^1\text{H}\}$  NMR (125 MHz,  $\text{CDCl}_3$ ):  $\delta$  = 198.2, 149.3, 146.6, 136.6, 133.4, 129.4, 128.8, 128.1, 123.8, 39.5, 29.8.

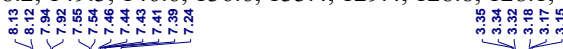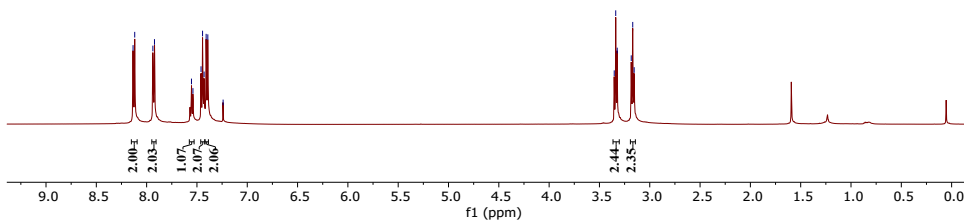

**Figure S58.**  $^1\text{H NMR}$  Spectrum (500 MHz,  $\text{CDCl}_3$ ) of **P26**.

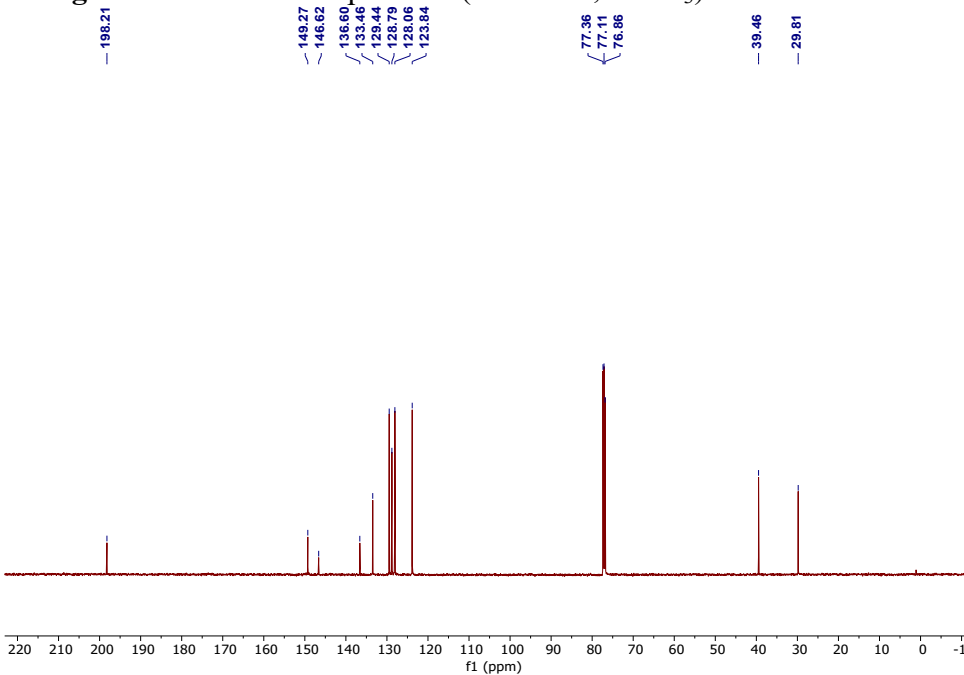

**Figure S59.**  $^{13}\text{C}\{^1\text{H}\}$  NMR Spectrum (125 MHz,  $\text{CDCl}_3$ ) of **P26**.

### Synthesis P27

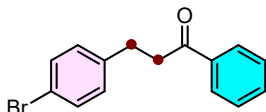

**3-(4-bromophenyl)-1-phenylpropan-1-one (27):** 122.9 mg, 85% isolated yield; white solid.  $^1\text{H NMR}$  (400 MHz,  $\text{CDCl}_3$ ):  $\delta$  = 7.93 (d,  $J_{\text{H,H}}$  = 7.3 Hz, 2H), 7.54 (t,  $J_{\text{H,H}}$  = 7.3 Hz, 1H), 7.44 (t,  $J_{\text{H,H}}$  = 7.7 Hz, 2H), 7.39 (d,  $J_{\text{H,H}}$  = 8.5 Hz, 2H), 7.11 (d,  $J_{\text{H,H}}$  = 8.5 Hz, 2H), 3.26 (t,  $J_{\text{H,H}}$  = 7.4 Hz, 2H), 3.01 (t,  $J_{\text{H,H}}$  = 7.4 Hz, 2H).  $^{13}\text{C}\{^1\text{H}\}$  NMR (100 MHz,  $\text{CDCl}_3$ ):  $\delta$  = 198.9, 140.3, 136.8, 133.3, 131.6, 130.3, 128.7, 128.1, 120.0, 40.2, 29.5.

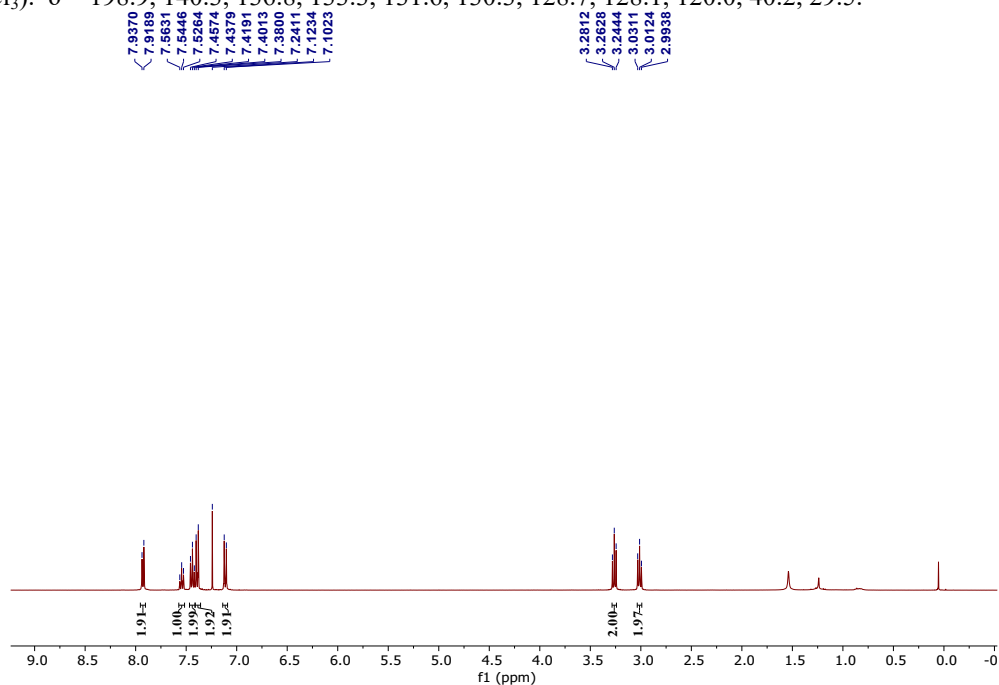

Figure S60.  $^1\text{H NMR}$  Spectrum (500 MHz,  $\text{CDCl}_3$ ) of P27.

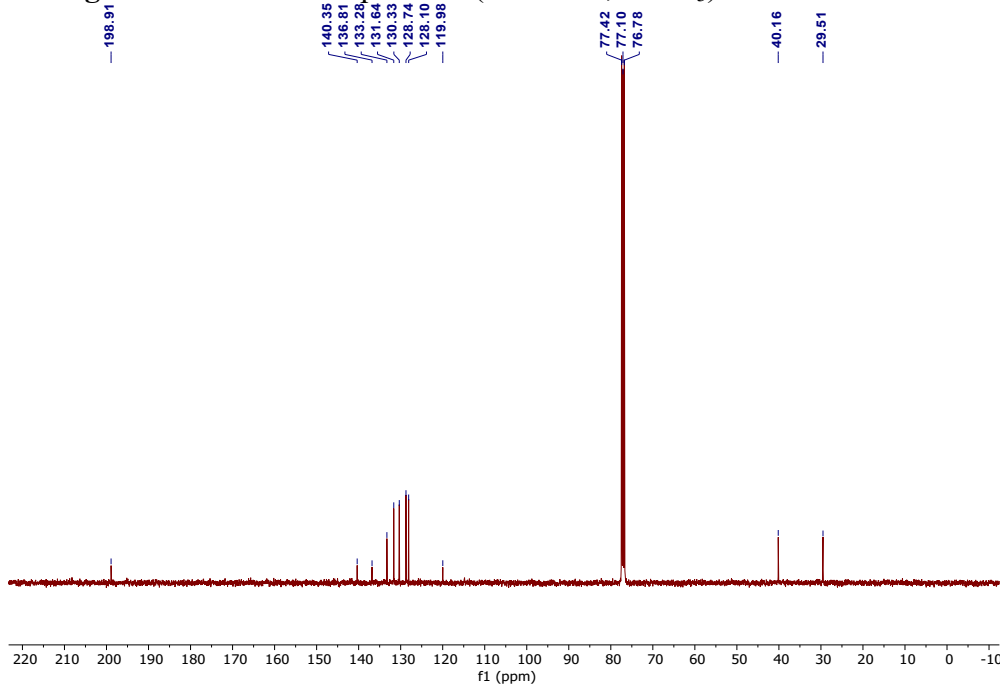

Figure S61.  $^{13}\text{C}\{^1\text{H}\}$  NMR Spectrum (125 MHz,  $\text{CDCl}_3$ ) of P27.

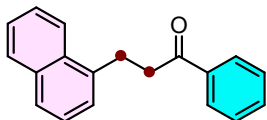

### Synthesis P28

**3-(naphthalen-1-yl)-1-phenylpropan-1-one (28):** 114.5 mg, 79% isolated yield; white solid.  $^1\text{H NMR}$  (500 MHz,  $\text{CDCl}_3$ ):  $\delta = 8.04$  (d,  $J_{\text{H,H}} = 7.9$  Hz, 1H), 7.96 – 7.93 (m, 2H), 7.86 (d,  $J_{\text{H,H}} = 8.3$  Hz, 1H), 7.75 – 7.70 (m, 1H), 7.54 – 7.38 (m, 7H), 3.53 (t,  $J_{\text{H,H}} = 7.9$  Hz, 2H), 3.42 (t,  $J_{\text{H,H}} = 7.5$  Hz, 2H).  $^{13}\text{C}\{^1\text{H}\}$  NMR (125 MHz,  $\text{CDCl}_3$ ):  $\delta = 199.4$ , 137.4, 136.9, 133.2, 129.0, 128.7, 128.1, 127.1, 126.2, 126.2, 125.7, 125.7, 123.6, 39.8, 27.3.

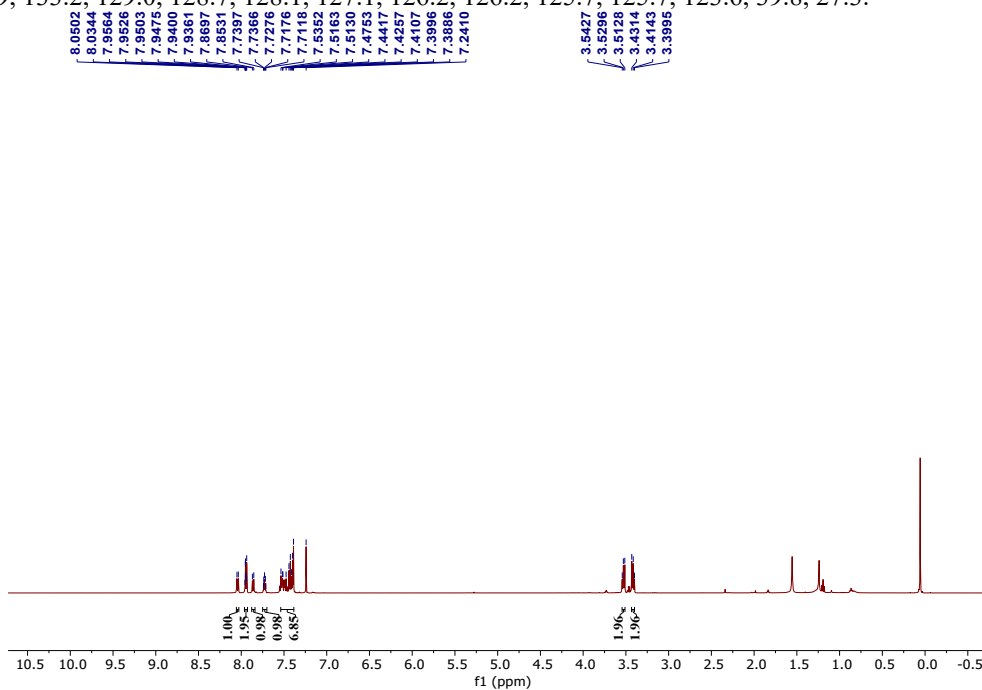

Figure S62.  $^1\text{H NMR}$  Spectrum (500 MHz,  $\text{CDCl}_3$ ) of P28.

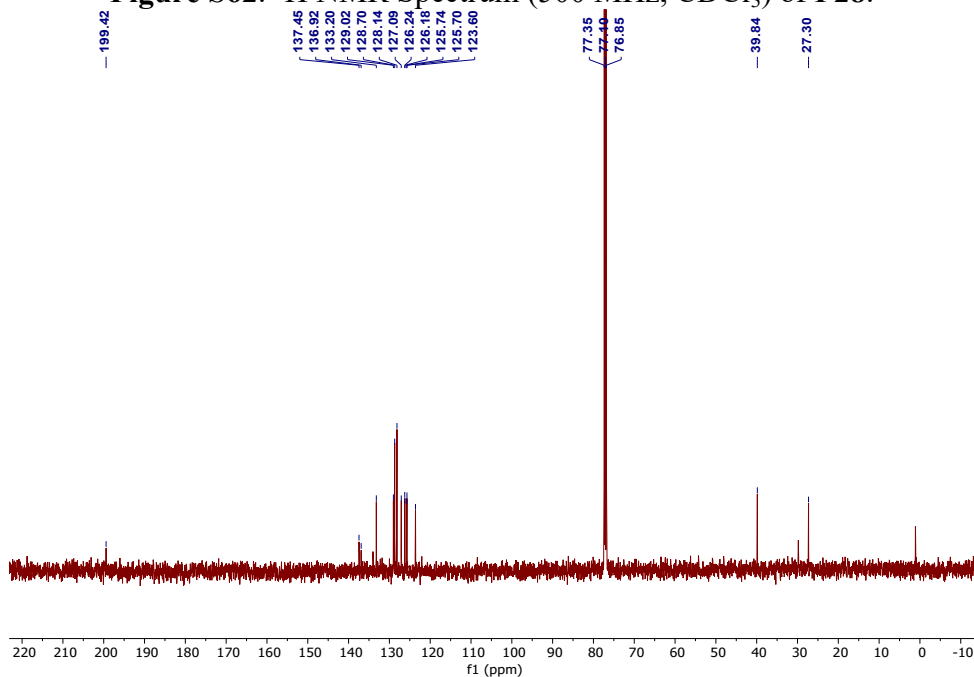

Figure S63.  $^{13}\text{C}\{^1\text{H}\}$  NMR Spectrum (125 MHz,  $\text{CDCl}_3$ ) of P28.

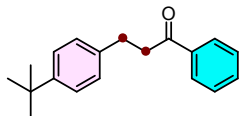

**Synthesis P29:**

**Synthesis of 3-(4-(tert-butyl)phenyl)-1-phenylpropan-1-one(29)** 54.6 mg, 80% isolated yield; oily liquid.  $^1\text{H}$  NMR (500 MHz,  $\text{CDCl}_3$ ):  $\delta$ = 7.99-7.97 (dd, 2H), 7.58-7.55 (m, 1H), 7.48-7.45 (m, 2H), 7.36-7.35 (dd, 2H), 3.34-3.31(t, 2H), 3.08-3.05(t, 2H), 1.34 (s, 9H).  $^{13}\text{C}\{^1\text{H}\}$  NMR (125 MHz,  $\text{CDCl}_3$ ): (125 MHz,  $\text{CDCl}_3$ ): 199.45, 149.06, 138.30, 136.98, 133.14, 128.70, 128.19, 128.15, 125.52, 40.59, 34.48, 31.50, 29.67.

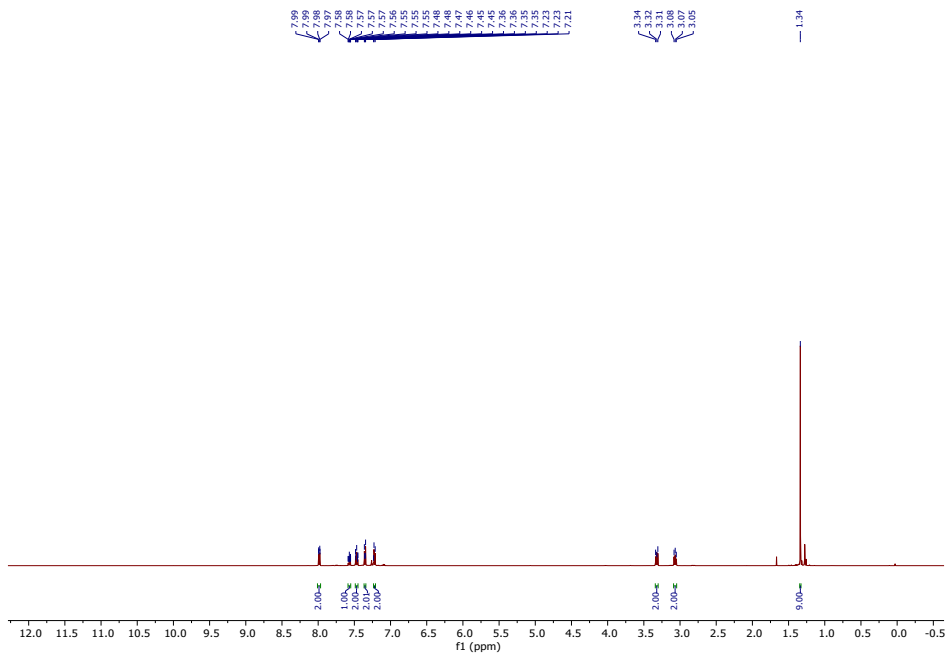

**Figure S64.**  $^1\text{H}$  NMR Spectrum (500 MHz,  $\text{CDCl}_3$ ) of **P29**.

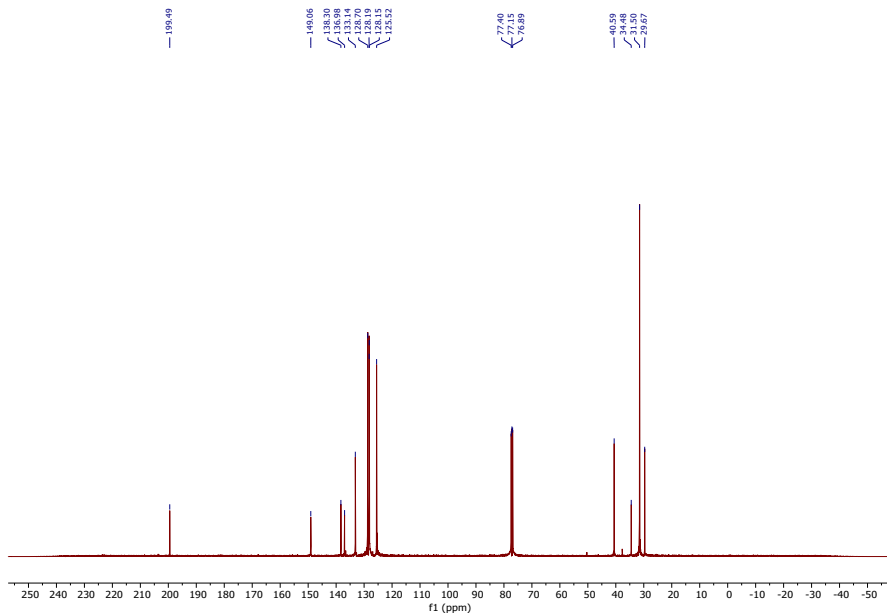

**Figure S65.**  $^{13}\text{C}\{^1\text{H}\}$  NMR Spectrum (125 MHz,  $\text{CDCl}_3$ ) of **P29**.

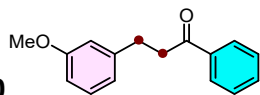

### Synthesis of P30

**Synthesis of 3-(3-methoxyphenyl)-1-phenylpropan-1-one(P30)** 64 mg, 79% isolated yield; oily liquid.  $^1\text{H NMR}$  (500 MHz,  $\text{CDCl}_3$ ):  $\delta$  7.98-7.96(dd, 2H), 7.58-7.55(m, 1H), 7.48-7.44(m, 2H), 7.26-7.21(m, 1H), 6.86-6.85(d, 1H), 6.81(s, 1H), 6.78-6.75(dd, 1H), 3.80(s, 3H), 3.32-3.29(t, 2H), 3.07-3.04(t, 2H).  $^{13}\text{C}\{^1\text{H}\}$  NMR (125 MHz,  $\text{CDCl}_3$ ): 199.29, 159.82, 143.02, 136.92, 133.17, 129.61, 128.70, 128.13, 120.86, 114.32, 111.50, 55.25, 40.45, 30.26.

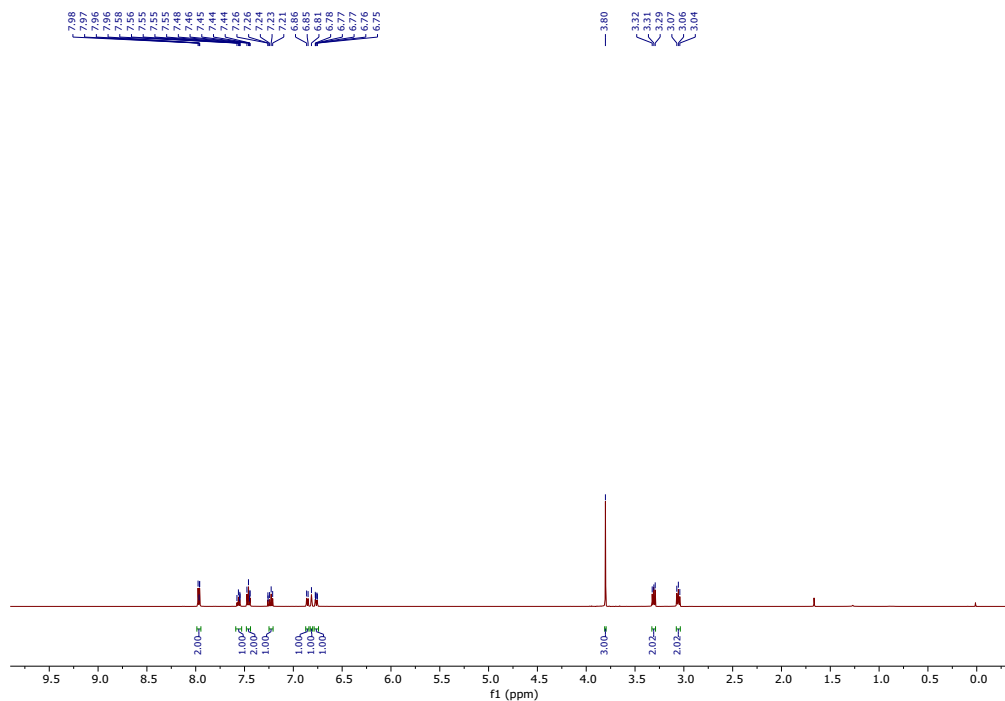

Figure S66.  $^1\text{H NMR}$  Spectrum (500 MHz,  $\text{CDCl}_3$ ) of P30.

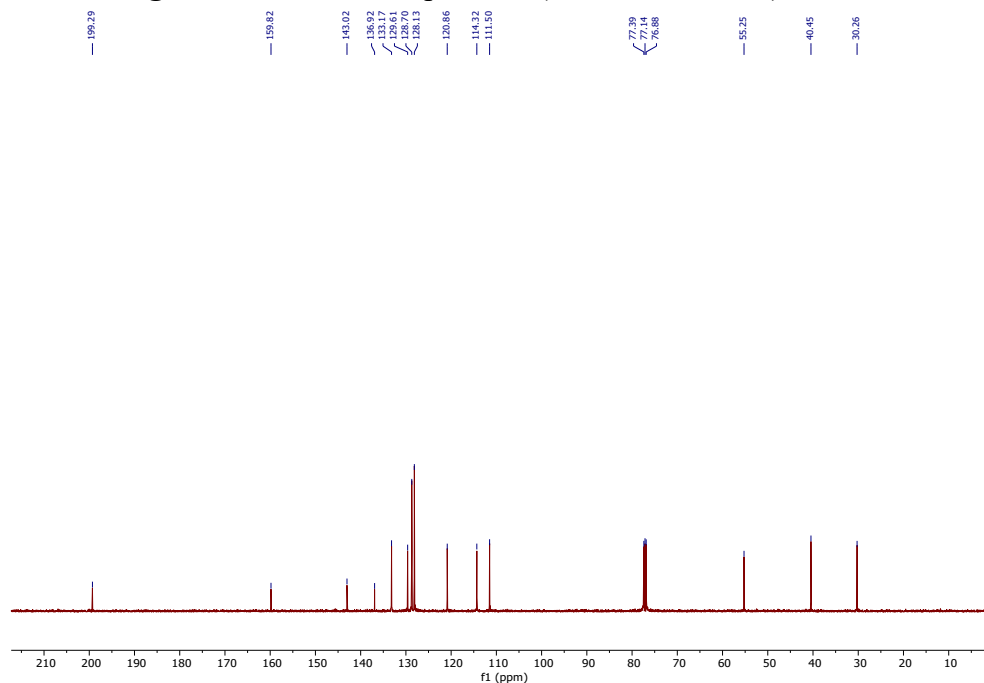

Figure S67.  $^{13}\text{C}\{^1\text{H}\}$  NMR Spectrum (125 MHz,  $\text{CDCl}_3$ ) of P30.

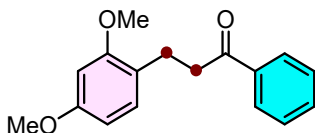

### Synthesis P31

**Synthesis of 3-(2,4-dimethoxyphenyl)-1-phenylpropan-1-one(P31)** 46.6 mg, 82% isolated yield; oily liquid.  $^1\text{H}$  NMR (500 MHz,  $\text{CDCl}_3$ ):  $\delta$ =8.00-7.98(dd, 2H), 7.56-7.53(m, 1H), 7.47-7.44(m, 2H), 7.12-7.10(d, 1H), 6.47-6.42(m, 2H), 3.81-3.80(d, 6H), 3.26-3.23(t, 2H), 3.01-2.98(t, 2H).  $^{13}\text{C}\{^1\text{H}\}$  NMR (125 MHz,  $\text{CDCl}_3$ ): 200.18, 159.52, 158.40, 137.02, 132.90, 130.37, 128.55, 128.14, 121.87, 103.88, 98.56, 55.38, 55.23, 39.23, 25.16.

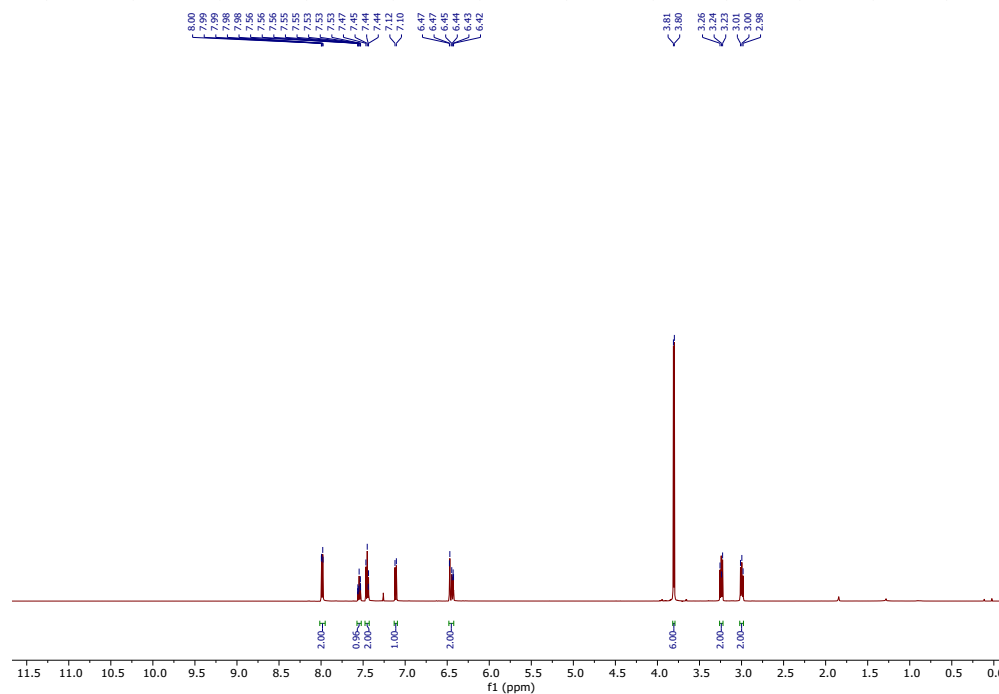

Figure S68.  $^1\text{H}$  NMR Spectrum (500 MHz,  $\text{CDCl}_3$ ) of P31.

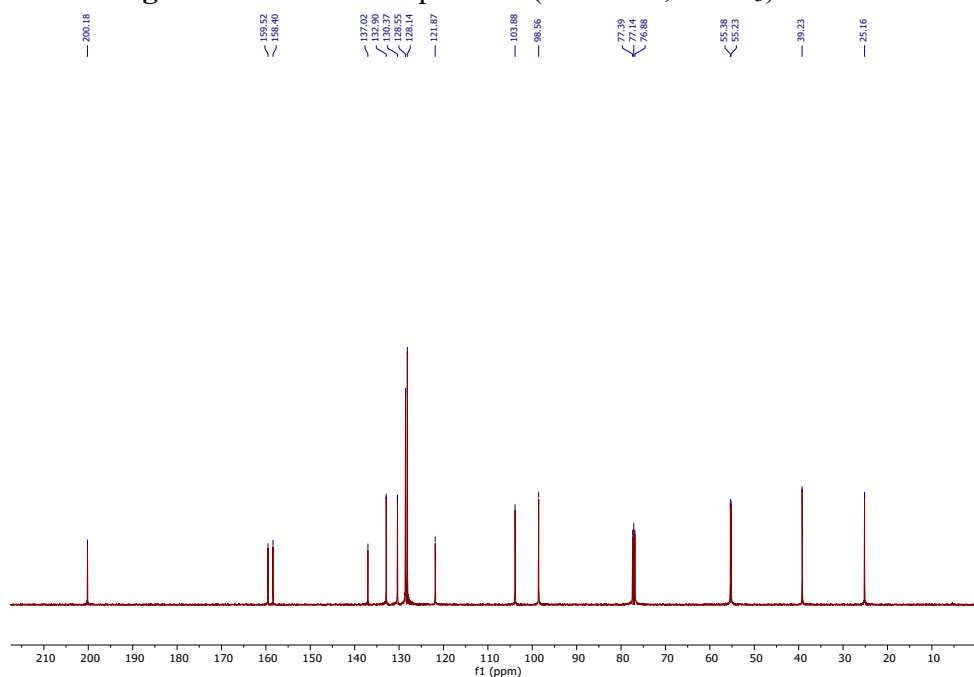

Figure S69.  $^{13}\text{C}\{^1\text{H}\}$  NMR Spectrum (125 MHz,  $\text{CDCl}_3$ ) of **P31**.

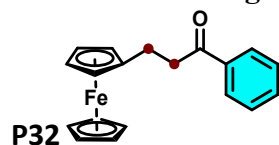

**Synthesis of 3-phenyl-1-(ferrocenyl)propan-1-one (P32)** 138 mg 80% isolated yield; white solid.  $^1\text{H}$  NMR (400 MHz,  $\text{CDCl}_3$ ):  $\delta$  = 7.98 – 7.91 (m, 2H), 7.57 – 7.51 (m, 1H), 7.45 (t,  $J_{\text{H,H}} = 7.7$  Hz, 2H), 4.11 (s, 4H), 4.10 – 4.08 (m, 2H), 4.05 (q,  $J_{\text{H,H}} = 2.3, 1.8$  Hz, 2H), 3.18 (t,  $J_{\text{H,H}} = 8.1$  Hz, 2H), 2.77 (t,  $J_{\text{H,H}} = 7.5$  Hz, 2H).  $^{13}\text{C}\{^1\text{H}\}$  NMR (100 MHz,  $\text{CDCl}_3$ ):  $\delta$  = 199.6, 137.0, 133.1, 128.7, 128.1, 88.1, 68.6, 68.2, 67.4, 40.4, 24.2.

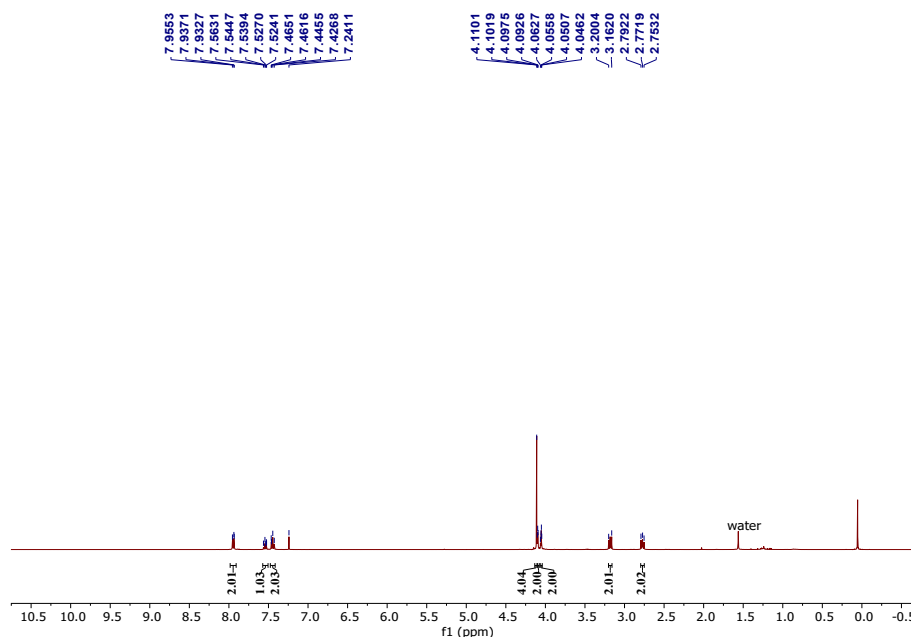

Figure S70.  $^1\text{H}$  NMR Spectrum (500 MHz,  $\text{CDCl}_3$ ) of **P32**.

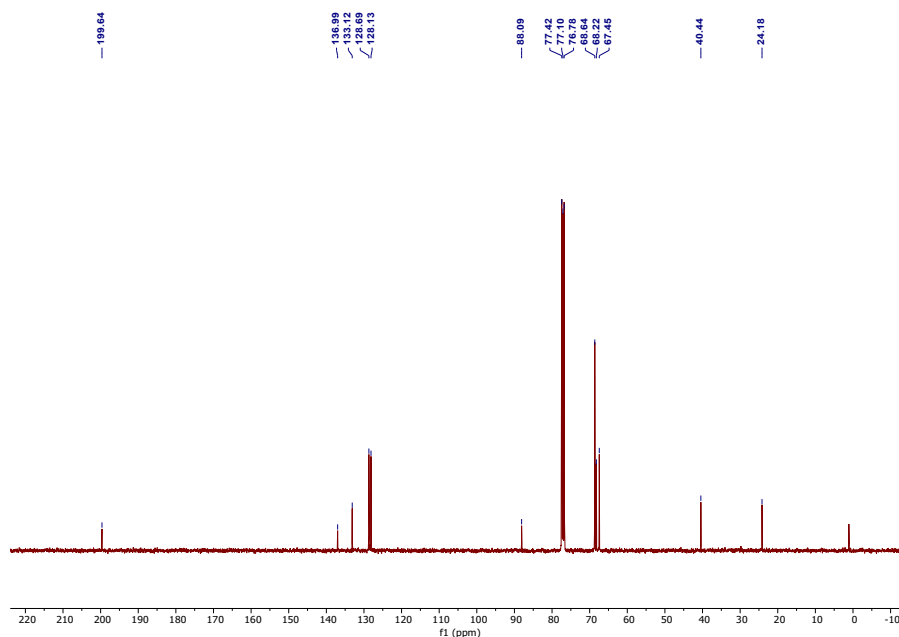

Figure S71.  $^{13}\text{C}\{^1\text{H}\}$  NMR Spectrum (125 MHz,  $\text{CDCl}_3$ ) of **P32**.

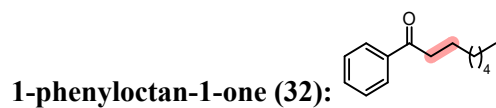

Purified by column chromatography using silica gel and ethyl acetate-hexane as eluent 75%, isolated yield; white solid.  $^1\text{H}$  NMR (400 MHz,  $\text{CDCl}_3$ ):  $\delta$  = 7.94 (d,  $J_{\text{H,H}} = 7.6$  Hz, 2H), 7.53 (t,  $J_{\text{H,H}} = 7.3$  Hz, 1H), 7.43 (t,  $J_{\text{H,H}} = 7.6$  Hz, 2H), 2.94 (t,  $J_{\text{H,H}} = 7.6$  Hz, 2H), 1.71 (q,  $J_{\text{H,H}} = 7.4$  Hz, 2H), 1.34 – 1.24 (m, 8H), 0.88 – 0.84 (m, 3H).  $^{13}\text{C}$  NMR (100 MHz,  $\text{CDCl}_3$ ):  $\delta$  = 200.7, 137.2, 132.9, 128.6, 128.1, 38.7, 31.8, 29.4, 29.2, 24.5, 22.7, 14.1.

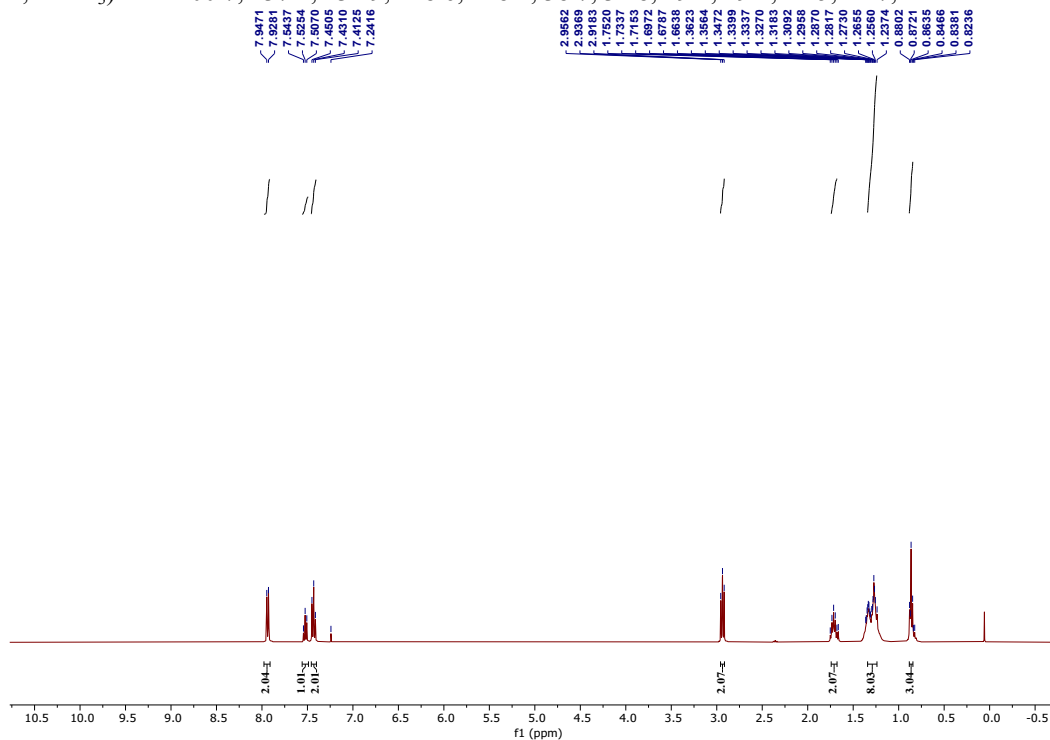

**Figure S72.**  $^1\text{H}$  NMR Spectrum (500 MHz,  $\text{CDCl}_3$ ) of **P33**.

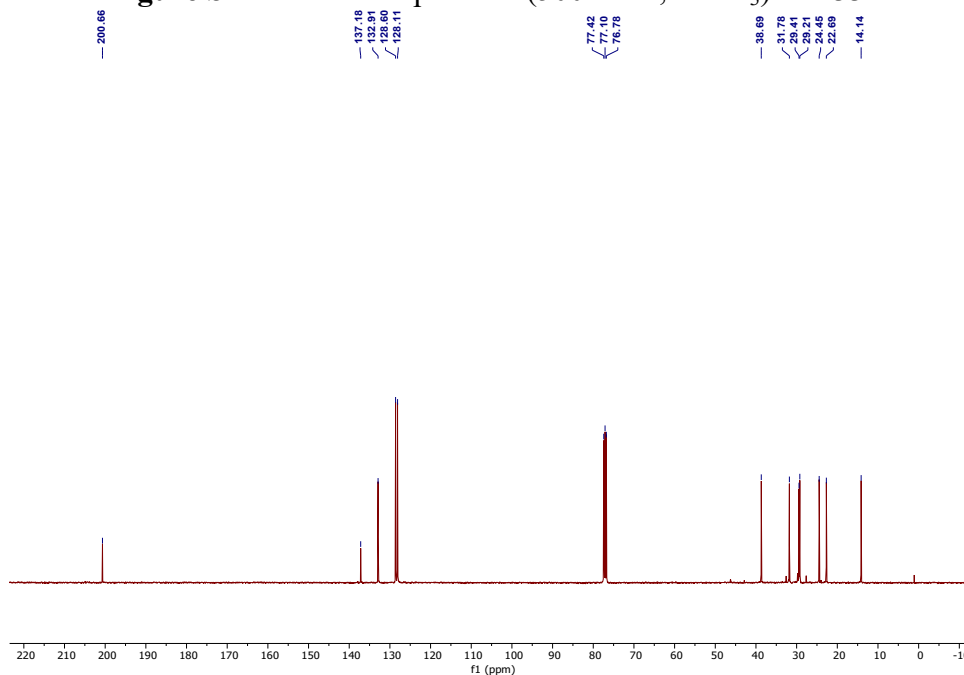

Figure S73.  $^{13}\text{C}\{^1\text{H}\}$  NMR Spectrum (125 MHz,  $\text{CDCl}_3$ ) of P33.

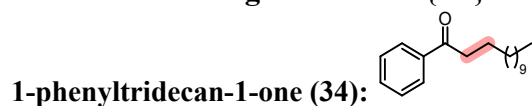

Purified by column chromatography using silica gel and ethyl acetate-hexane as eluent 73% (100.2 mg) isolated yield; white solid.  $^1\text{H}$  NMR (400 MHz,  $\text{CDCl}_3$ ):  $\delta$  = 7.95 – 7.93 (m, 2H), 7.56 – 7.50 (m, 1H), 7.44 (dd,  $J_{\text{H,H}}$  = 8.4, 7.0 Hz, 2H), 2.93 (d,  $J_{\text{H,H}}$  = 7.5 Hz, 2H), 1.73 – 1.69 (m, 2H), 1.24 (s, 18H), 0.85 (d,  $J_{\text{H,H}}$  = 7.1 Hz, 3H).  $^{13}\text{C}$  NMR (100 MHz,  $\text{CDCl}_3$ ):  $\delta$  = 200.7, 137.2, 132.9, 128.6, 128.1, 38.7, 32.0, 29.7, 29.7, 29.6, 29.5, 29.4, 24.5, 22.8, 14.2.

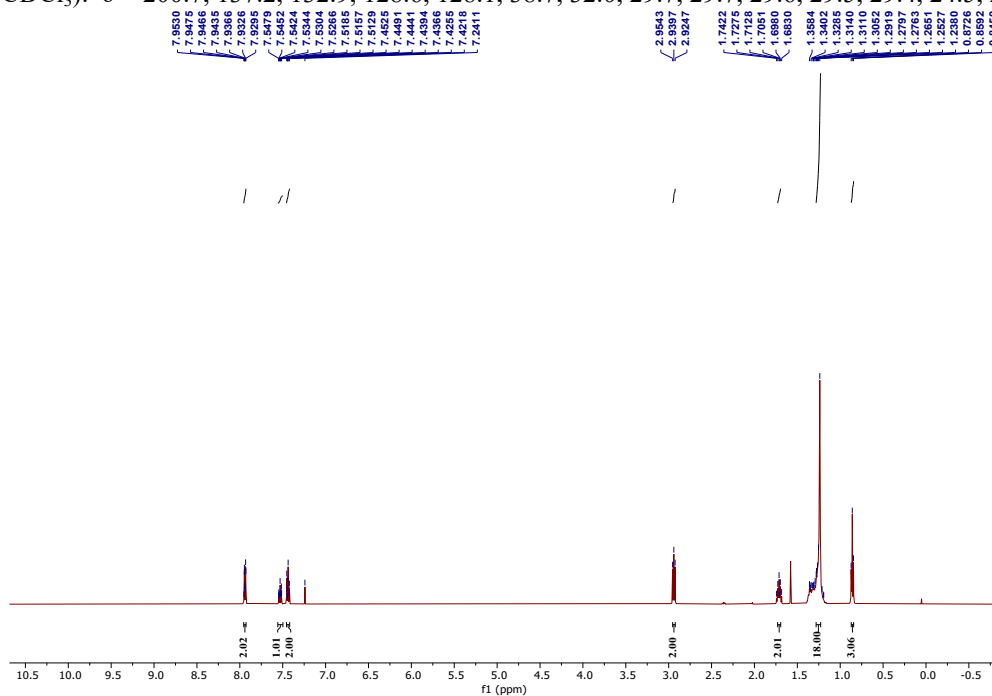

Figure S74.  $^{13}\text{C}$  NMR Spectrum (125 MHz,  $\text{CDCl}_3$ ) of P34.

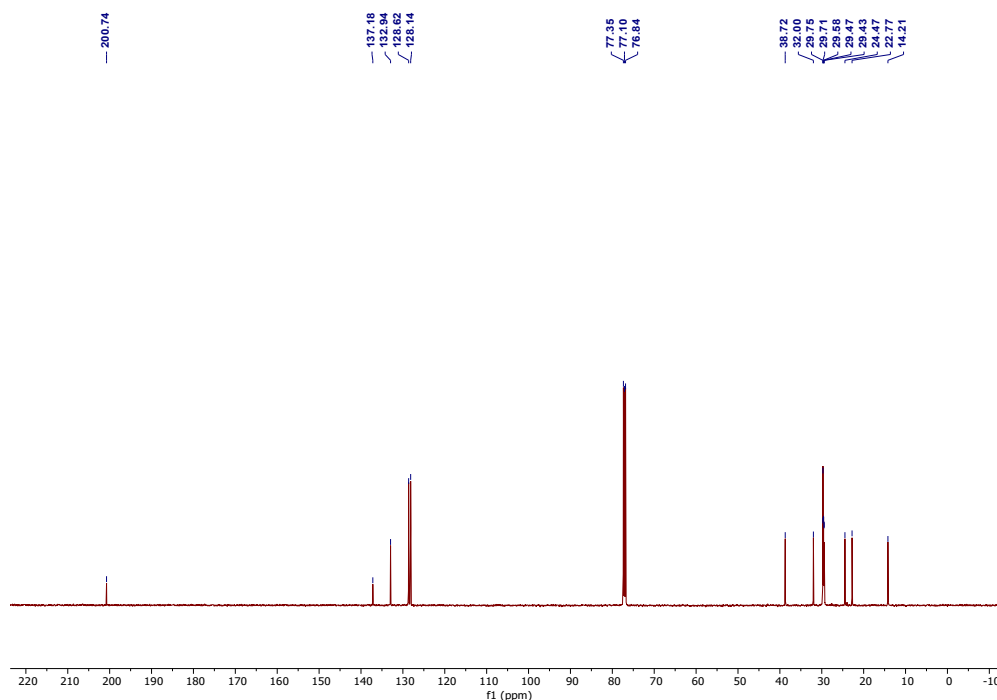

Figure S75.  $^{13}\text{C}\{^1\text{H}\}$  NMR Spectrum (125 MHz,  $\text{CDCl}_3$ ) of P34.

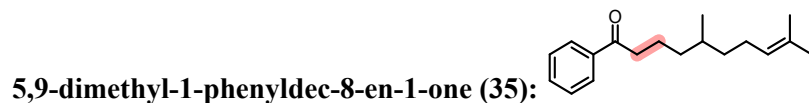

Purified by column chromatography using silica gel and ethyl acetate-hexane as eluent 75% (96.9 mg) isolated yield; white solid.  $^1\text{H}$  NMR (400 MHz,  $\text{CDCl}_3$ ):  $\delta$  = 7.94 (d,  $J_{\text{H,H}} = 7.6$  Hz, 2H), 7.53 (t,  $J_{\text{H,H}} = 7.4$  Hz, 1H), 7.44 (t,  $J_{\text{H,H}} = 7.6$  Hz, 2H), 5.08 (t,  $J_{\text{H,H}} = 7.4$  Hz, 1H), 2.93 (t,  $J_{\text{H,H}} = 7.4$  Hz, 2H), 1.94 (dt,  $J_{\text{H,H}} = 14.7, 6.8$  Hz, 2H), 1.76 – 1.68 (m, 2H), 1.66 (s, 3H), 1.58 (s, 3H), 1.44 – 1.32 (m, 3H), 1.18 (m, 2H), 0.88 (d,  $J_{\text{H,H}} = 6.2$  Hz, 3H).  $^{13}\text{C}$  NMR (125 MHz,  $\text{CDCl}_3$ ):  $\delta$  = 200.7, 137.2, 132.9, 131.2, 128.6, 128.1, 125.0, 39.0, 37.0, 36.7, 32.4, 25.8, 25.6, 21.9, 19.5, 17.7.

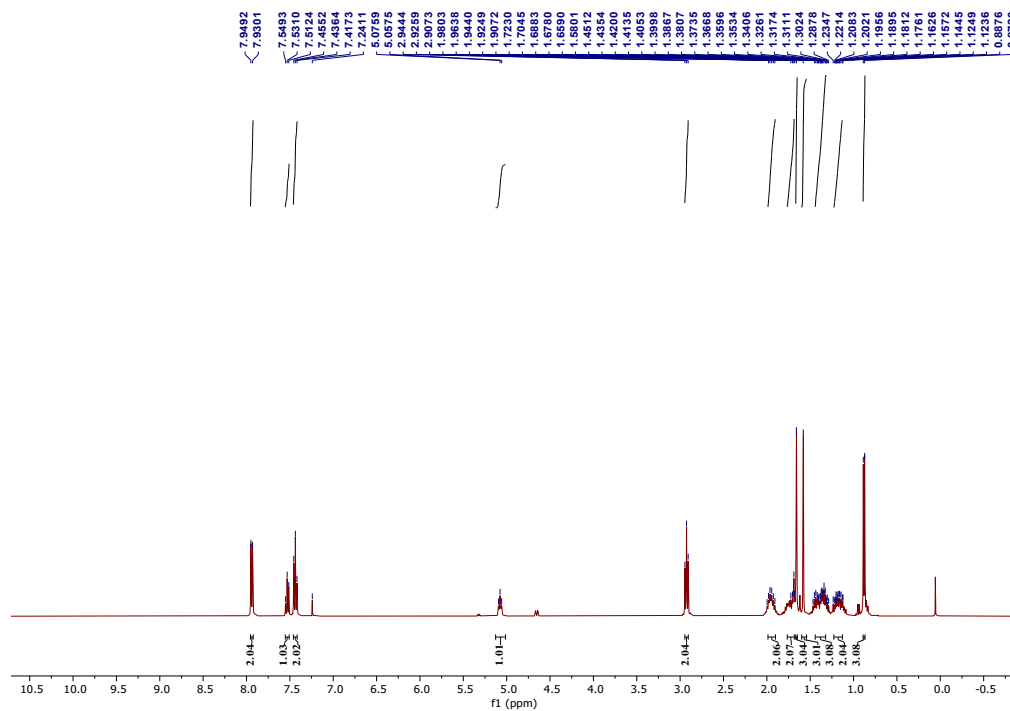

Figure S76.  $^1\text{H}$  NMR Spectrum (500 MHz,  $\text{CDCl}_3$ ) of P35.

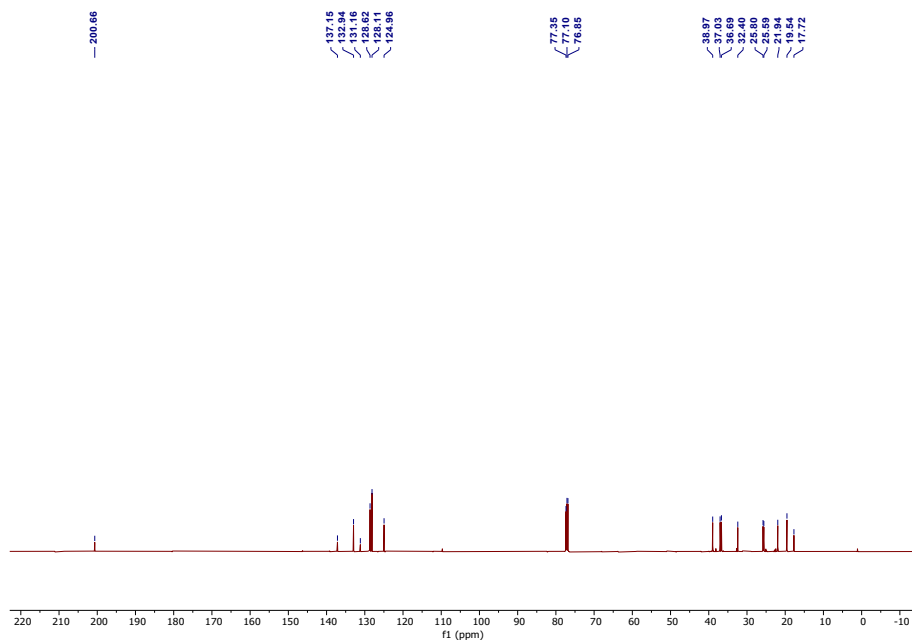

Figure S77.  $^{13}\text{C}\{^1\text{H}\}$  NMR Spectrum (125 MHz,  $\text{CDCl}_3$ ) of P35.

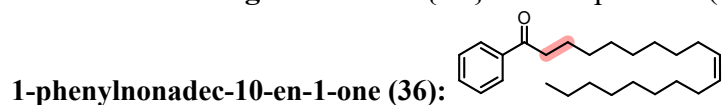

Purified by column chromatography using silica gel and ethyl acetate-hexane as eluent 76% (135.5 mg) isolated yield; white solid.  $^1\text{H}$  NMR (400 MHz,  $\text{CDCl}_3$ ):  $\delta$  = 7.93 (s, 2H), 7.53 (s, 1H), 7.43 (s, 2H), 5.34 (dt,  $J_{\text{H,H}}$  = 14.6, 4.3 Hz, 2H), 2.94 (s, 2H), 1.95 (m, 4H), 1.72 (q,  $J_{\text{H,H}}$  = 7.3 Hz, 4H), 1.24 (s, 23H), 0.86 (s, 3H).  $^{13}\text{C}$  NMR (100 MHz,  $\text{CDCl}_3$ ):  $\delta$  = 200.7, 137.2, 132.9, 130.5, 130.4, 128.6, 128.1, 38.7, 32.7, 32.0, 29.8, 29.7, 29.6, 29.5, 29.3, 29.2, 27.3, 24.5, 22.8, 14.2.

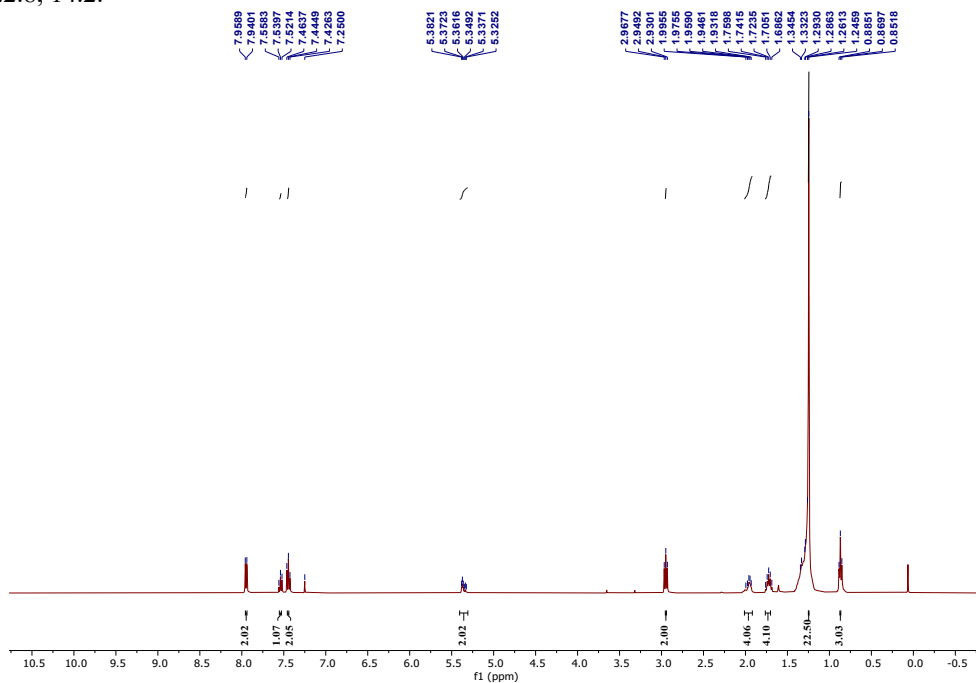

Figure S78.  $^1\text{H}$  NMR Spectrum (500 MHz,  $\text{CDCl}_3$ ) of P36.

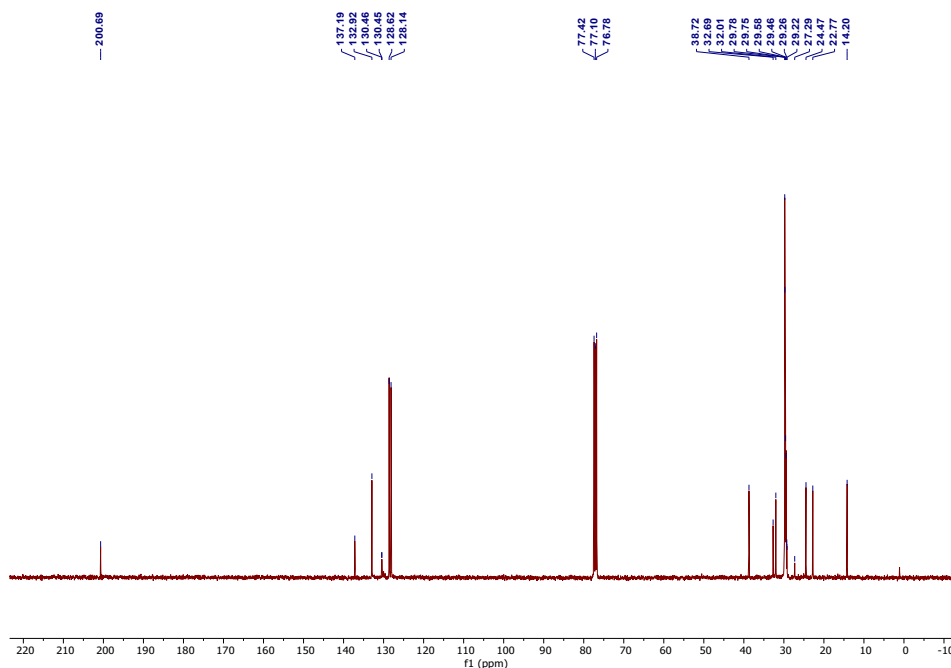

Figure S79.  $^{13}\text{C}\{^1\text{H}\}$  NMR Spectrum (125 MHz,  $\text{CDCl}_3$ ) of P36.

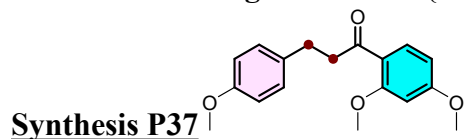

**1-(2,4-dimethoxyphenyl)-3-(4-methoxyphenyl)propan-1-one (P37)**. 48.4 mg; 70% isolated yield; yellow solid:  $^1\text{H}$  NMR (500 MHz,  $\text{CDCl}_3$ ):  $\delta$  = 7.80 (d, 1H), 7.15 (d, 2H), 6.82 (d, 2H), 6.53 – 6.50 (m, 1H), 6.44 (d, 1H), 3.86 (s, 3H), 3.84 (s, 3H), 3.77 (s, 3H), 3.22 (t, 2H), 2.93 (t, 2H).  $^{13}\text{C}$  NMR (125 MHz,  $\text{CDCl}_3$ ):  $\delta$  = 199.7, 164.5, 160.9, 157.9, 134.2, 132.9, 129.5, 121.2, 113.9, 105.2, 98.5, 55.6, 55.6, 55.5, 45.7, 29.9.

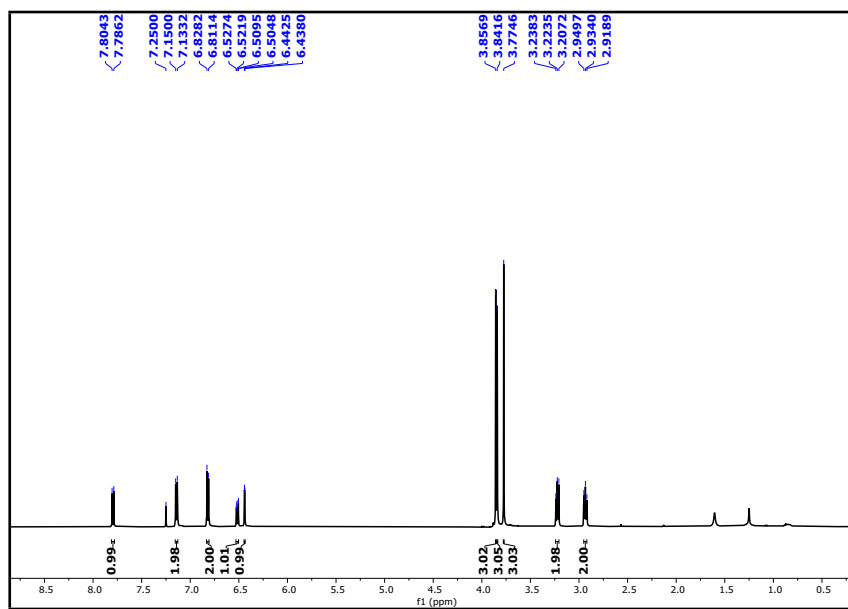

Figure S80.  $^1\text{H}$  NMR Spectrum (500 MHz,  $\text{CDCl}_3$ ) of P37.

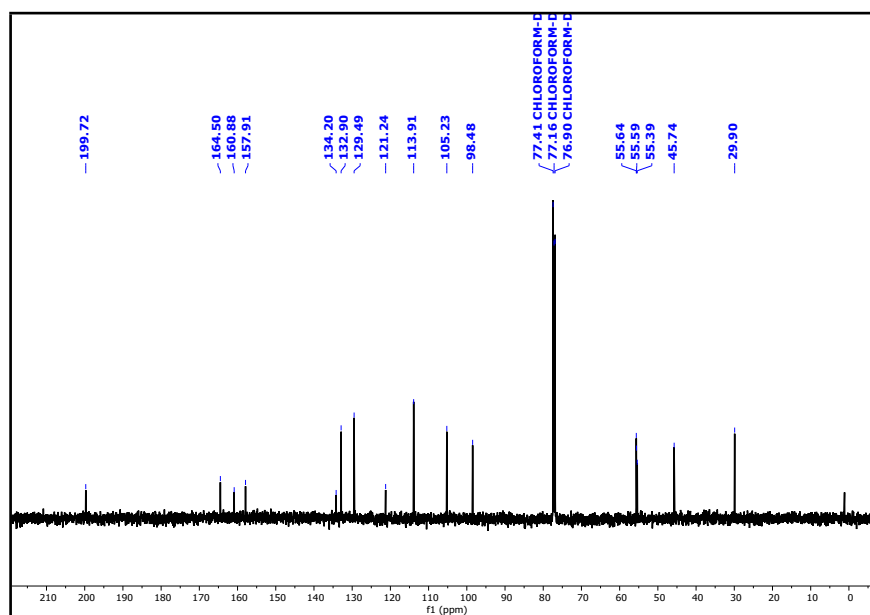

Figure S81.  $^{13}\text{C}$  NMR Spectrum (125 MHz,  $\text{CDCl}_3$ ) of P37.

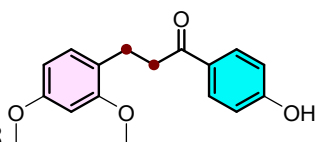

### Synthesis P38

**3-(2,4-dimethoxyphenyl)-1-(4-hydroxyphenyl)propan-1-one (P38)**. 48 mg; 73% isolated yield; yellow solid:  $^1\text{H}$  NMR (500 MHz,  $\text{CDCl}_3$ ):  $\delta$  = 7.90 (d, 2H), 7.06 (d, 1H), 6.88 (d, 2H), 6.44 – 6.39 (m, 2H), 3.77 (s, 6H), 3.17 (t, 2H), 2.95 (t, 2H).  $^{13}\text{C}$  NMR (125 MHz,  $\text{CDCl}_3$ ):  $\delta$  = 200.1, 160.9, 159.5, 158.5, 131.0, 130.4, 122.0, 115.5, 104.0, 98.7, 55.5, 55.3, 39.0, 25.7.

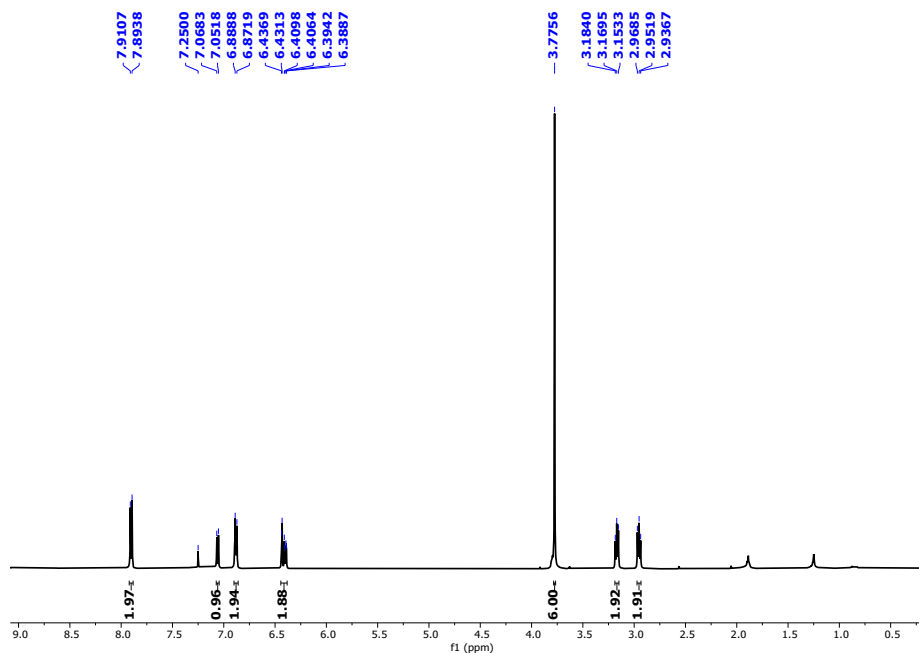

Figure S82.  $^1\text{H}$  NMR Spectrum (500 MHz,  $\text{CDCl}_3$ ) of P38.

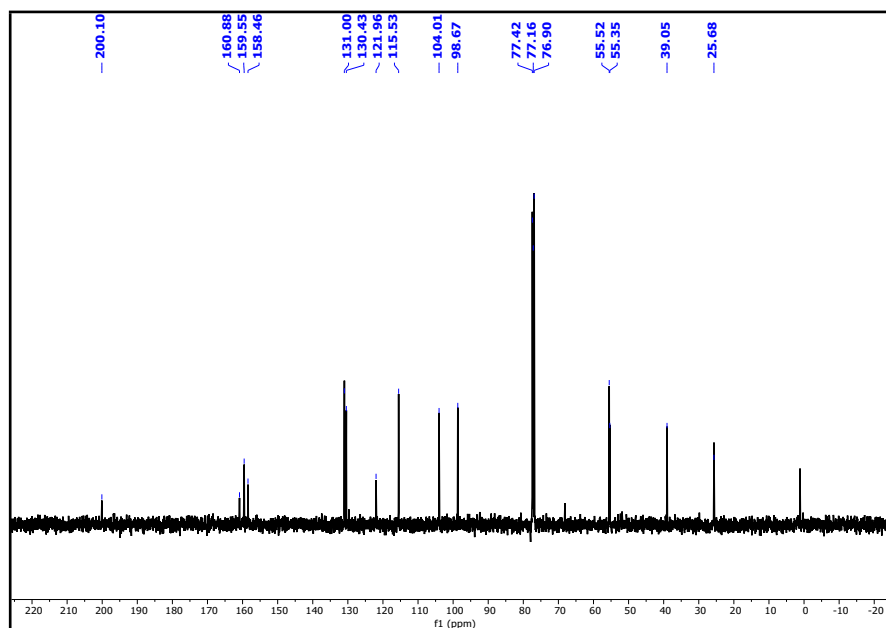

Figure S83.  $^{13}\text{C}\{^1\text{H}\}$  NMR Spectrum (125 MHz,  $\text{CDCl}_3$ ) of P38.

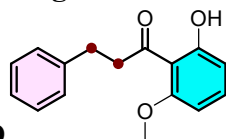

### Synthesis P39

**1-(2-hydroxy-6-methoxyphenyl)-3-phenylpropan-1-one (P39).** 53.4 mg; 79% isolated yield; yellow oil:  $^1\text{H}$  NMR (500 MHz,  $\text{CDCl}_3$ ):  $\delta$  = 13.20 (s, 1H), 7.35 – 7.23 (m, 6H), 6.58 (d, 1H), 6.38 (d, 1H), 3.87 (s, 3H), 3.38 (t, 2H), 3.01 (t, 2H).  $^{13}\text{C}\{^1\text{H}\}$  NMR (125 MHz,  $\text{CDCl}_3$ ):  $\delta$  = 206.6, 164.8, 161.4, 141.7, 136.1, 128.6, 126.1, 111.3, 111.0, 101.3, 55.8, 46.6, 30.6.

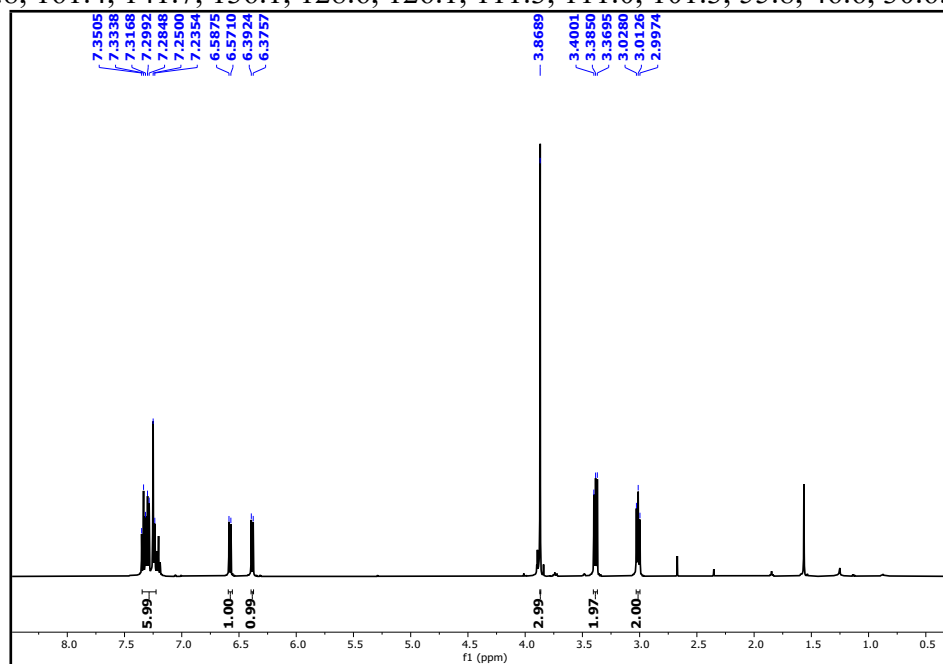

Figure S84.  $^1\text{H}$  NMR Spectrum (500 MHz,  $\text{CDCl}_3$ ) of P39.

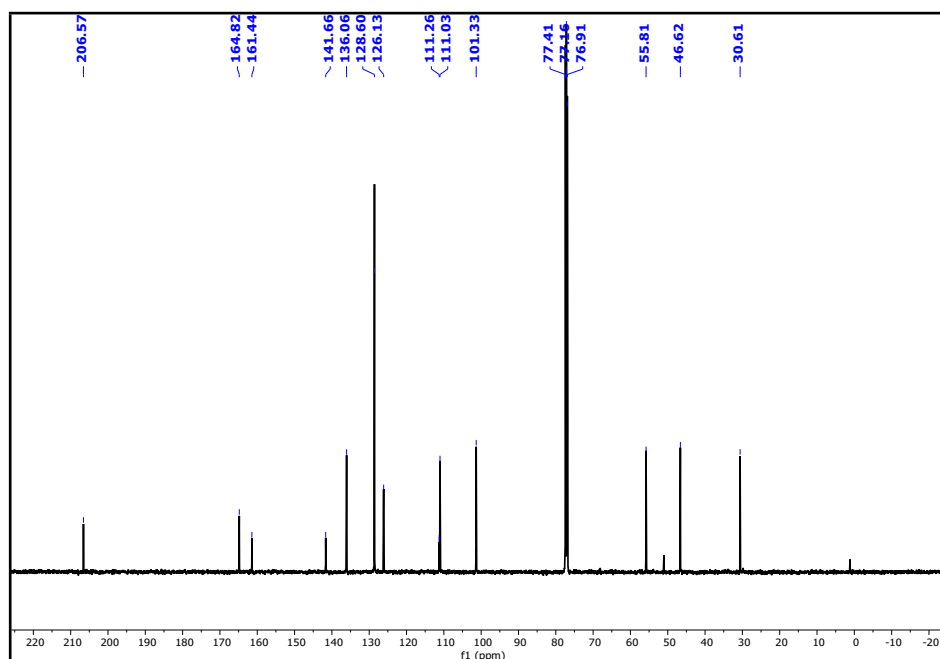

Figure S85.  $^{13}\text{C}\{^1\text{H}\}$  NMR Spectrum (125 MHz,  $\text{CDCl}_3$ ) of P39.

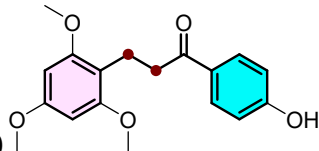

### Synthesis P40

**1-(4-hydroxyphenyl)-3-(2,4,6-trimethoxyphenyl)propan-1-one, 40.** 55.0 mg; 79% isolated yield; yellow solid:  $^1\text{H}$  NMR (500 MHz,  $\text{CDCl}_3$ ):  $\delta$  = 7.89 (d, 2H), 6.87 (d, 2H), 6.74 (s, 1H), 6.50 (s, 1H), 3.85 (s, 3H), 3.79 (s, 3H), 3.79 (s, 3H), 3.17 (t, 2H), 2.95 (t, 2H).  $^{13}\text{C}\{^1\text{H}\}$  NMR (100 MHz,  $\text{CDCl}_3$ ):  $\delta$  = 199.6, 160.8, 151.7, 148.1, 142.9, 130.9, 129.8, 121.2, 115.5, 114.7, 97.9, 56.8, 56.4, 39.1, 25.8.

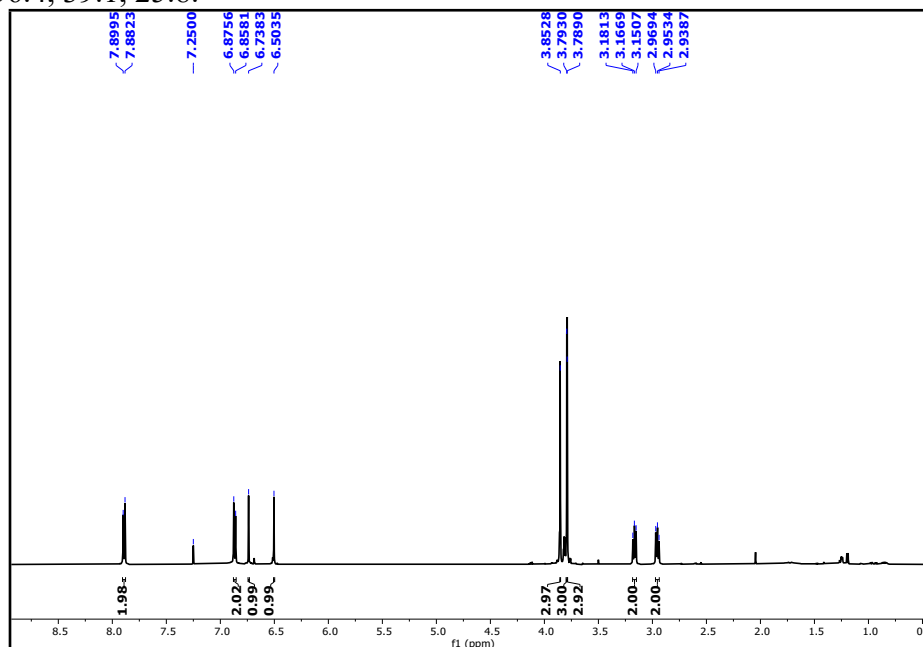

Figure S86.  $^1\text{H}$  NMR Spectrum (500 MHz,  $\text{CDCl}_3$ ) of P40.

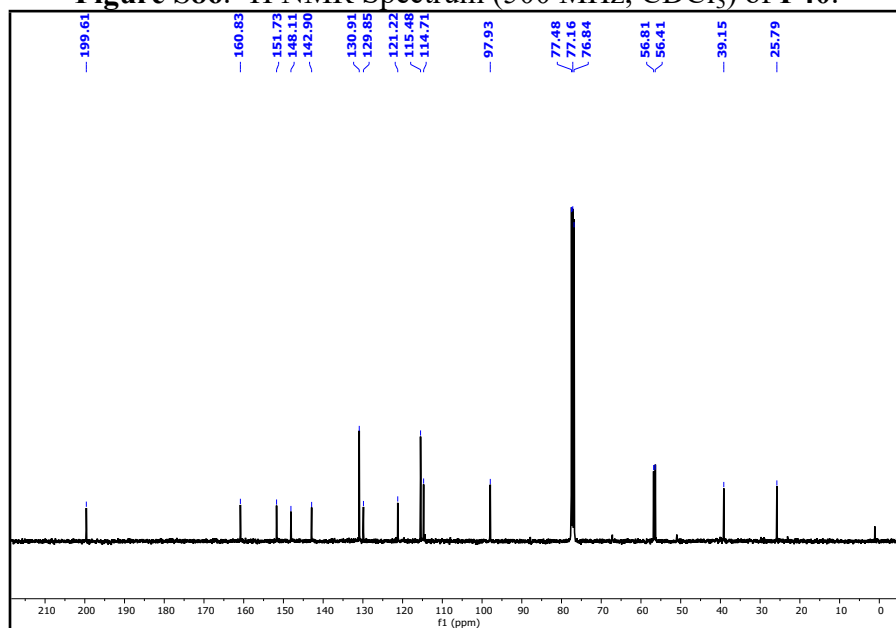

Figure S87.  $^{13}\text{C}\{^1\text{H}\}$  NMR Spectrum (125 MHz,  $\text{CDCl}_3$ ) of P40.

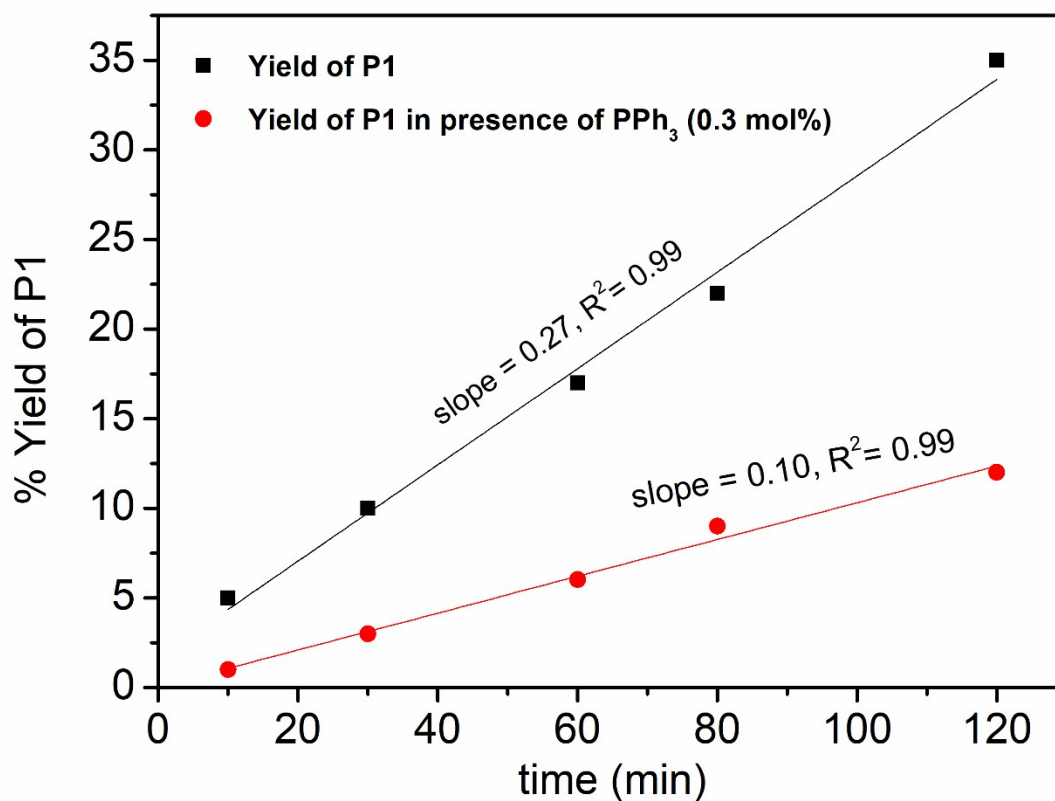

Figure S88. Determination of initial slopes for the product formation in the presence of excess  $\text{PPh}_3$ .

**Experimental condition:** Kinetic experiments were performed using a model  $\alpha$ -alkylation reaction under catalytic conditions. In a typical experiment, complex **1** (0.1 mol %) was dissolved in dry, degassed toluene under an inert atmosphere. The 4'-methoxyacetophenone (2 mmol) and phenylmethanol (2.2 mmol) were added, and the reaction mixture was heated at 120 °C. Apparent rate constants were determined by monitoring product formation as a function of time using  $^1\text{H}$  NMR. To evaluate the effect of phosphine coordination, parallel experiments were conducted in the presence of added triphenylphosphine ( $\text{PPh}_3$ , 10 equiv. relative to Complex **1**). Initial rates were determined from the linear region of the product concentration versus time plots. In the absence of added  $\text{PPh}_3$ , a significantly higher apparent rate constant was observed. In contrast, the addition of excess  $\text{PPh}_3$  resulted in a pronounced decrease in the apparent rate of product formation, indicating inhibition of the catalytic process. Experiments were repeated twice to ensure reproducibility.

e.

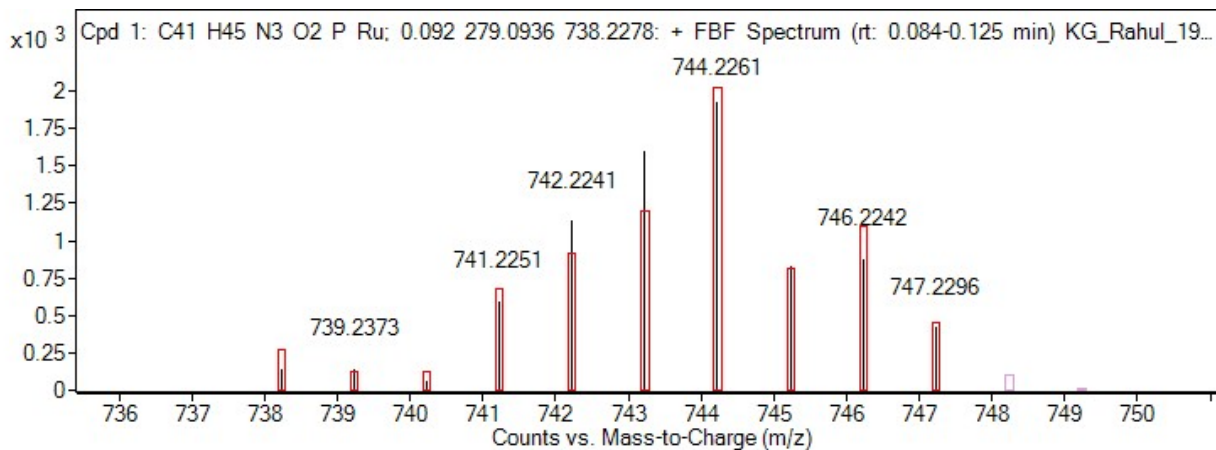

**Figure S89.**HRMS spectrum of Intermediate **C**

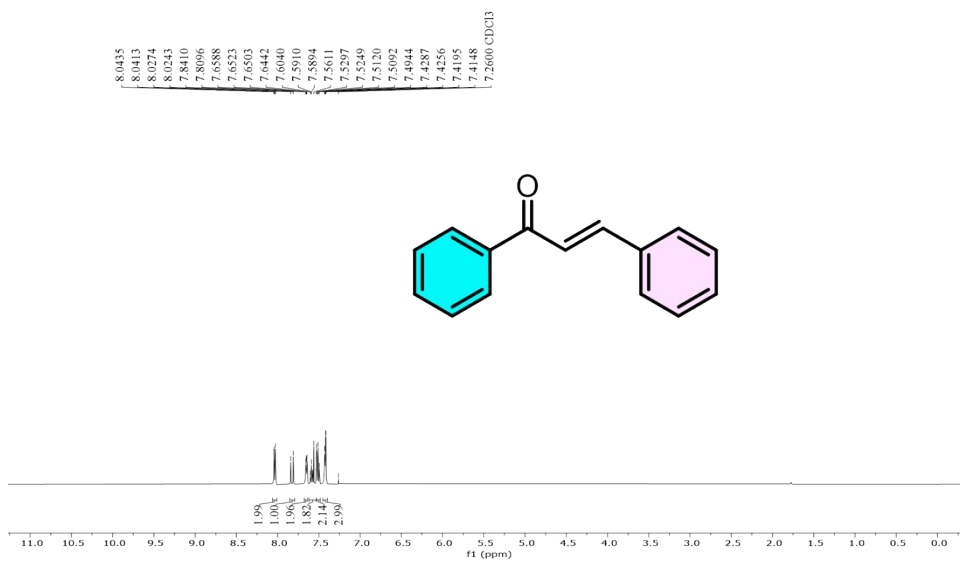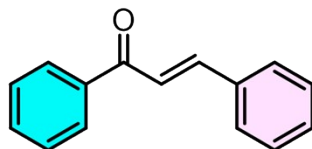

Figure S90.  $^1\text{H}$  NMR Spectrum (500 MHz,  $\text{CDCl}_3$ ).

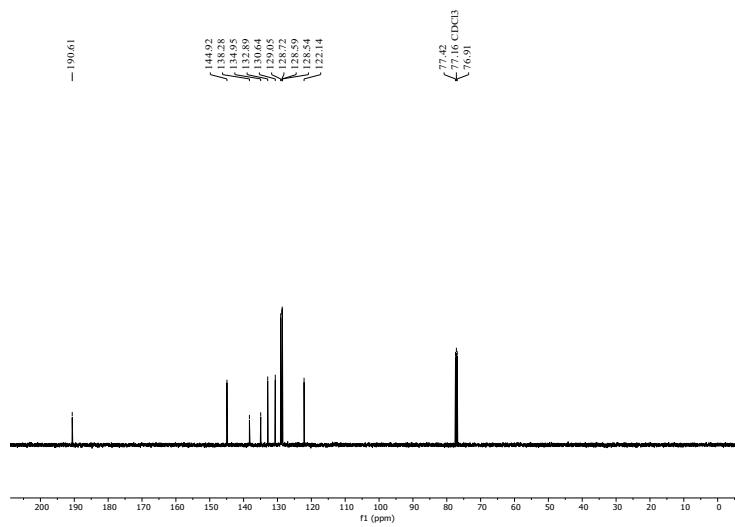

Figure S91.  $^{13}\text{C}\{^1\text{H}\}$  NMR Spectrum (125 MHz,  $\text{CDCl}_3$ )

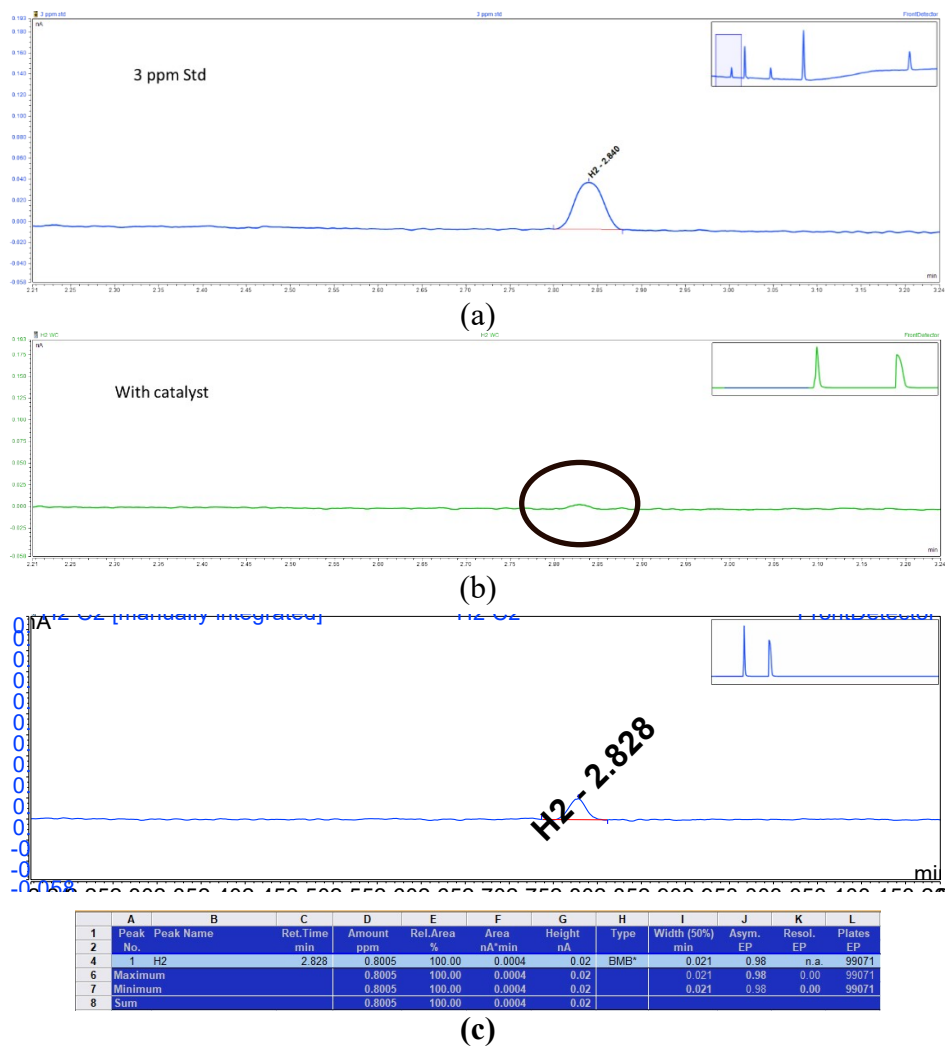

**Figure S92.** GC-PDD chromatogram a) hydrogen standard (3 ppm) and; b) catalytic mixture from H tube (Scheme S1D); catalytic mixture from H tube (Scheme S1E).

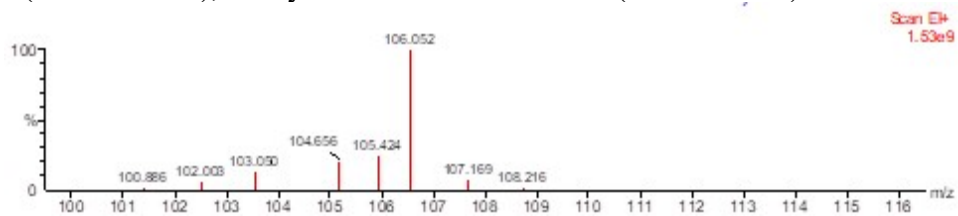

**Figure S93.** GC-MS spectra of styrene reduction.

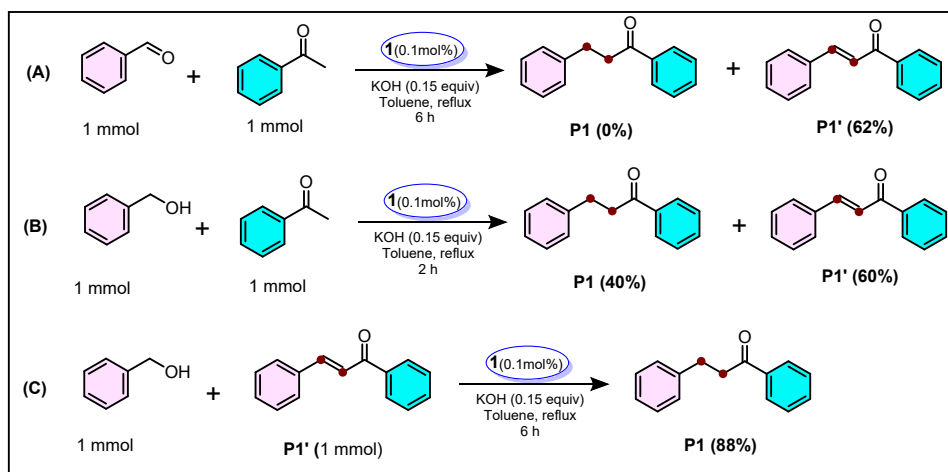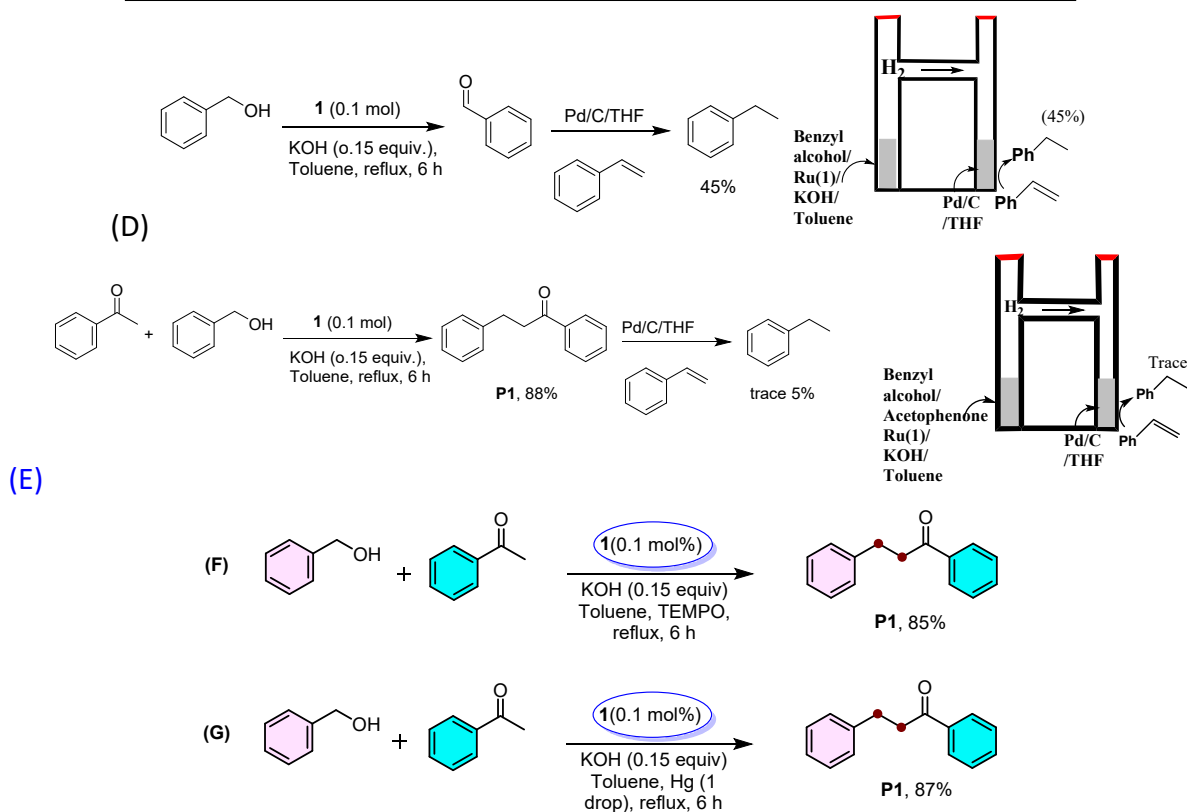

**Scheme S1.** Control experiments.

#### 4. References

1. R. Freitag, T. J. Muller, J. Conradie, *J. Chem. Crystallogr.* 2014, **44**, 352.
2. N. Miyaura, A. Suzuki, *Chem. Rev.* 1995, **95**, 2457.
3. L. Krause, R. Herbst-Irmer, G.M. Sheldrick, D. J. Stalke, *Appl. Crystallogr.* 2015, **48**, 3.
4. G. Sheldrick, *Acta Cryst. C*, 2015, **71**, 3.
5. O. V. Dolomanov, L. J. Bourhis, R. O.J. Gildea, J.A.K. Howard, H. Puschmann, H., *J. Appl. Crystallogr.* 2009, **42**, 339.
6. S. Singh, R. Prasad, S. Upreti, N. Jha, A. Ramanan, *Acta. Crystallogr. Sect. E Struct.* 2006, **62**, 1014.

7. M. J. Frisch, G. W. Trucks, H. B. Schlegel, G. E. Scuseria, M. A. Robb, J. R. Cheeseman, G. Scalmani, V. Barone, B. Mennucci, G. A. Petersson, H. Nakatsuji, M. Caricato, X. Li, H. P. Hratchian, A. F. Izmaylov, J. Bloino, G. Zheng, J. L. Sonnenberg, M. Hada, M. Ehara, K. Toyota, R. Fukuda, J. Hasegawa, M. Ishida, T. Nakajima, Y. Honda, O. Kitao, H. Nakai, T. Vreven, J. A. Montgomery Jr., J. E. Peralta, F. Ogliaro, M. Bearpark, J. J. Heyd, E. Brothers, K. N. Kudin, V. N. Staroverov, R. Kobayashi, J. Normand, K. Raghavachari, A. Rendell, J. C. Burant, S. S. Iyengar, J. Tomasi, M. Cossi, N. Rega, N. J. Millam, M. Klene, J. E. Knox, J. B. Cross, V. Bakken, C. Adamo, J. Jaramillo, R. Gomperts, R. E. Stratmann, O. Yazyev, A. J. Austin, R. Cammi, C. Pomelli, J. W. Ochterski, R. L. Martin, K. Morokuma, V. G. Zakrzewski, G. A. Voth, P. Salvador, J. J. Dannenberg, S. Dapprich, A. D. Daniels, Ö. Farkas, J. B. Foresman, J. V. Ortiz, J. Cioslowski and D. J. Fox, *Gaussian 09, Revision D.01*, Gaussian, Inc., Wallingford CT, 2009
8. R.D. Dennington, T.A. Keith, J. M. Millam, 2008 GaussView 5.0.8, Gaussian.
